# Supplementary material for: Driver versus navigator causation in biology: the case of insulin and fasting glucose
Source: PeerJ journal article supplement (doi:10.7717/peerj.10396), 2020-12-11
Supplement: PRISMA_IRKO_meta-analysis_flowchart.pdf [file PRISMA_IRKO_meta-analysis_flowchart.pdf]

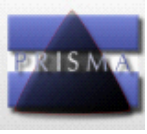

## PRISMA 2009 Flow Diagram- Insulin Receptor Knockout (IRKO) meta-analysis

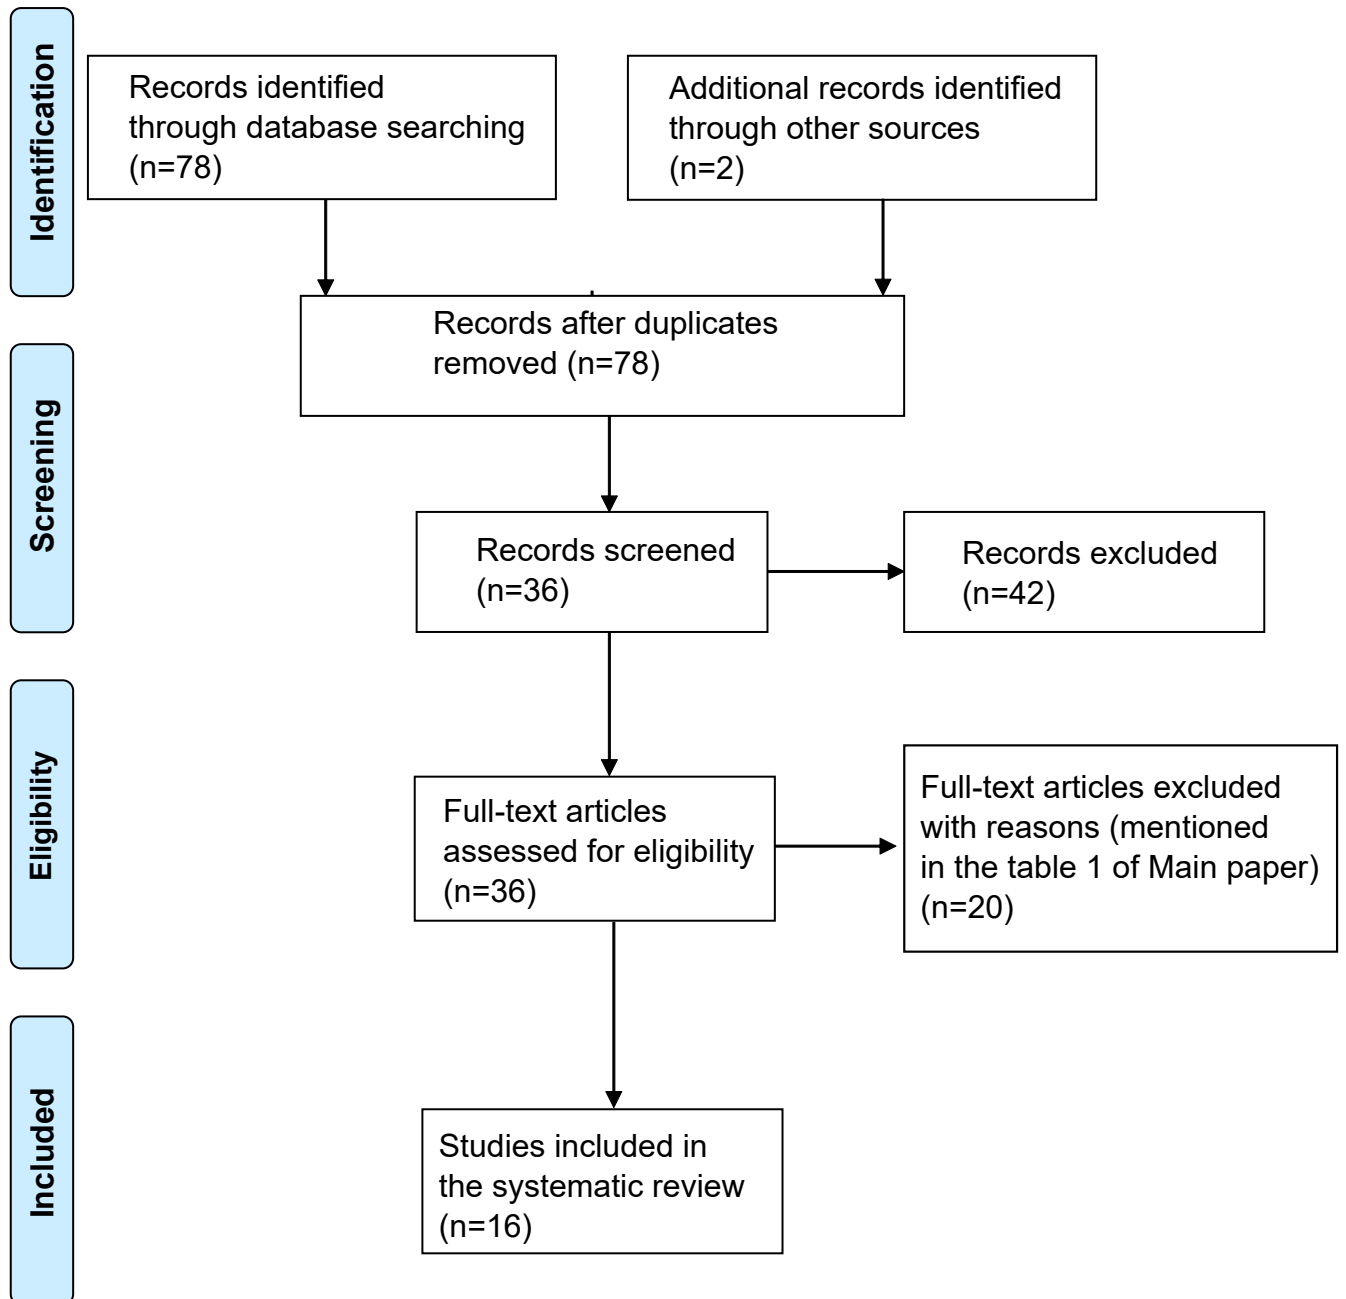

From: Moher D, Liberati A, Tetzlaff J, Altman DG, The PRISMA Group (2009). Preferred Reporting Items for Systematic Reviews and Meta-Analyses: The PRISMA Statement. PLoS Med 6(6): e1000097. doi:10.1371/journal.pmed1000097

For more information, visit [www.prisma-statement.org](http://www.prisma-statement.org).
