# Supplementary material for: Driver versus navigator causation in biology: the case of insulin and fasting glucose
Source: PeerJ. 2020 Dec 11;8:e10396. doi: 10.7717/peerj.10396 (PMC7735078; doi:10.7717/peerj.10396)
Supplement: Supplemental Information 9 [file peerj-08-10396-s009.xlsx]

## Sheet: Duration of fasting
		3	6	9	12	16
STZ		592	394	289	337	279
		460	313	248	262	263
		397	324	371	263	275
		572	474	427	370	349
		440	311	147	95	104
		576	387	358	309	237
		372	118	72	55	54
		173	78	83	81	71
		327	69	55	53	61
Control		111	96	97	116	81
		101	109	95	89	82
		107	95	75	98	80
		115	104	89	101	82
		114	82	93	85	97
		119	95	92	85	78
		115	77	90	85	78
		143	104	98	80	92
		123	86	100	78	100
		135	94	89	98	83
