# Supplementary material for: Driver versus navigator causation in biology: the case of insulin and fasting glucose
Source: PeerJ. 2020 Dec 11;8:e10396. doi: 10.7717/peerj.10396 (PMC7735078; doi:10.7717/peerj.10396)
Supplement: Supplemental Information 10 [file peerj-08-10396-s010.xlsx]

## Sheet: Fasting normal-fasting high
STZ-50									STZ-70
	Fasting high			Fasting normal					Fasting high				Fasting normal
Date	Rat label	FG	Post-meal G	Rat label	FG	Post-meal G	Date		Date	Rat label	FG	Post-meal G	Rat label	FG	Post-meal G	Date
04.07.2017	P2	288	484	F1	94	264	02.07.2017		04.07.2017	STZ-70-2	305	451	STZ-70-1	118	400	02.07.2017
28.07.2017	LT-STZ-1	279	592	F2	76	365			15.07.2017	STZ-70-3	185	429	STZ-F2	106	360	05.04.2018
	LT-STZ-3	263	460	F3	90	328	04.07.2017		05.04.2018	SPF-STZ-70-1	341	600	STZ-P1	100	464
	LT-STZ-4	275	397	P3	70	327				SPF-STZ-70-2	220	600	STZ-P2(1)	105	476
07.12.2017	LT-STZ-5	237	576	P4	97	335	15.07.2017			STZ-F1	206	309	HI-1	101	238	14.04.2018
	LT-STZ-6	349	512	F5	84	354			14.04.2018	HI-2	229	600	HI-3	124	404
				P4	84	394			13.04.2018	STZ-F3(1)	278	519	HI-4	95	141
				LT-STZ-2	104	440	28.07.2017			STZ-P3(1)	229	589	STZ-F4	108	450	13.04.2018
				LT-STZ-7	54	372	07.12.2017		10.05.2018	STZ-F3(2)	201	507	STZ-P2(2)	132	446
				LT-STZ-8	71	173							STZ-P2(3)	121	397	10.05.2018
				LT-STZ-10	61	327							STZ-P3(2)	98	414
				SPF-STZ-50-1	65	357	05.04.2018						HI-12	81	151	16.05.2018
				HI-6	83	308	14.04.2018						HI-21	106	340	19.05.2018
				HI-7	97	273
				HI-14	92	350	16.05.2018
				HI-16	71	198
				F4	136	399	15.07.2017
		STZ-50				STZ-70
		PP	Fasting normal	Fasting high		PP	Fasting normal	Fasting high
		264	94			400	118		mean	360.077
		365	76			360	106		SD	113.474
		328	90			464	100			107.308
		327	70			476	105			13.61
		335	97			238	101			511.556
		354	84			404	124			100.655
		394	84			141	95			243.778
		440	104			450	108			52.5423
		372	54			446	132
		173	71			397	121
		327	61			414	98
		357	65			151	81
		308	83			340	106
		273	97			451		305
		350	92			429		185
		198	71			600		341
		399	136			600		220
		484		288		309		206
		592		279		600		229
		460		263		519		278
		397		275		589		229
		576		237		507		201
		512		349
		FN-F	FN-PP	FH-F	FH-PP
	STZ-50	84.0588	327.294	281.833	503.5	mean
		19.4148	68.8002	37.3332	73.1785	SD
	STZ-70	107.308	360.077	243.778	511.556	mean
		13.61	113.474	52.5423	100.655	SD
1	94	264									400	118
2	76	365									360	106
3	90	328									464	100
4	70	327									476	105
5	97	335									238	101
6	84	354									404	124
7	84	394									141	95
8	104	440									450	108
9	54	372									446	132
10	71	173									397	121
11	61	327									414	98
12	65	357									151	81
13	83	308									340	106
14	97	273									451	305
15	92	350									429	185
16	71	198									600	341
17	136	399									600	220
18	288	484									309	206
19	279	592									600	229
20	263	460									519	278
21	275	397									589	229
22	237	576									507	201
23	349	512

## Sheet: Blood Glucose-fasting
	STZ-50
	STZ-F-1	STZ-F-2	STZ-F-3	STZ-F-4	STZ-F-5	STZ-F-6	STZ-P-1	STZ-P-2	STZ-P-3	STZ-P-4	STZ-P-5	STZ-P-6	STZ-50 fasting mean	STZ-50 fasting SD	STZ-fasting SE
1	94	76	90	136	84	59	83	288	70	84	62	40	97.1667	64.4428	18.603		60	6	6
2	74	111	84	181	97	83	54	117	78	73	66	61	89.9167	34.3603	9.91896		70	14	8
3	83	70	111	185	94	102	93	116	84	110	82	75	100.417	30.4256	8.78313		80	56	42
4	100	101	118	140	74	107	82	112	76	91	80	77	96.5	20.3537	5.8756		90	96	40
5	95	80	77	95	87	107	79	82	88	79	84	80	86.0833	8.93876	2.5804		100	118	22
6	105	96	84	83	75	103	85	80	85	94	80	75	87.0833	10.1306	2.92445		110	131	13
7	86	70	74	81	69	109	93	74	77	98	88	86	83.75	12.0765	3.48617		120	138	7
8	80	81	90	84	68	88	101	51	81	79	81	74	79.8333	12.2314	3.53089		130	138	0
9	83	77	49	107	95	104	87	76	74	78	87	80	83.0833	15.2223	4.39431		140	140	2
10	87	92	75	111	81	100	94	76	73	76	71	60	83	14.2382	4.11022		150	168	28
11	82	79	85	101	98	98	73	104	72	77	91	83	86.9167	11.1719	3.22504
12	89	78	71	208	93	100	83	71	86	84	91	77	94.25	36.8711	10.6438
	STZ-70
	STZ-70(1)	STZ-70(2)	STZ-70(3)	STZ-70(4)	STZ-F1	STZ-F2	STZ-F3	STZ-P1	STZ-P3	STZ-70 fasting mean	STZ-70 fasting SD	STZ-70 fasting SE
	118	305	255	93	158	126	201	119	98	163.667	74.6224	24.8741
	94	289	199	97	114	75	177	85	72	133.556	73.4781	24.4927
	85	307	116	77	206	106	139	100	78	134.889	75.9777	25.3259
	75	305	131	94	156	90	160	88	81	131.111	72.6953	24.2318
	91	218	147	64	100	103	113	92	100	114.222	44.6256	14.8752
	69	239	151	74	269	108	180	106	96	143.556	72.0783	24.0261
	60	313	215	81	386	149	78	97	88	163	117.083	39.0278
	69	191	148	80	436	116	163	88	122	157	112.057	37.3523
	88	291	324	74	379	100	119	104	68	171.889	122.58	40.86
	94	316	304	55	379	106	64	179	81	175.333	125.016	41.672
	65	315	310	82	409	113	222	99	97	190.222	127.062	42.3539
	69	333	308	81	345	83	353	84	91	194.111	134.082	44.6938
	Citrate Buffer (CB)
	CB-F-1	CB-F-2	CB-F-3	CB-F-4	CB-F-5	CB-F-6	CB-P-1	CB-P-2	CB-P-3	CB-P-4	CB-P-5	CB-P-6	CB-F	CB-P	CB fasting mean	CB fasting SD	CB fasting SE
	76	80	76	69	62	59	74	83	69	62	58	62	100	105	73.9286	14.4779	3.86938
	67	72	91	74	85	83	82	100	79	104	71	105	106	90	86.3571	13.3624	3.57126
	78	86	79	63	82	102	99	89	90	77	85	74	121	88	86.6429	14.0253	3.74842
	81	87	76	79	71	107	96	115	88	72	65	90	101	105	88.0714	15.102	4.03619
	95	92	87	74	71	107	76	81	78	72	70	80	107	83	83.7857	12.3611	3.30364
	69	85	79	82	80	103	76	91	105	92	74	86	101	92	86.7857	11.0883	2.96347
	83	83	80	79	71	109	81	62	111	82	73	112	113	103	88.7143	17.2289	4.60462
	89	82	86	91	75	88	85	70	51	85	79	78	119	113	85.0714	16.5876	4.43322
	82	90	83	89	85	104	77	72	71	81	77	77	88	116	85.1429	12.2717	3.27974
	80	71	77	65	90	56	66	74	93	105	74	74	95	88	79.1429	13.4956	3.60686
	79	71	81	66	84	81	74	111	74	83	71	79	106	99	82.7857	13.4403	3.59208
	68	89	72	66	74	87	71	75	80	98	84	77	78	92	79.3571	9.47553	2.53244
Day	CB fasting mean	CB fasting SD	STZ-50 fasting mean	STZ-50 fasting SD	STZ-70 fasting mean	STZ-70 fasting SD
1	73.9286	14.4779	97.1667	64.4428	163.667	74.6224
2	86.3571	13.3624	89.9167	34.3603	133.556	73.4781
3	86.6429	14.0253	100.417	30.4256	134.889	75.9777
4	88.0714	15.102	96.5	20.3537	131.111	72.6953
5	83.7857	12.3611	86.0833	8.93876	114.222	44.6256
6	86.7857	11.0883	87.0833	10.1306	143.556	72.0783
7	88.7143	17.2289	83.75	12.0765	163	117.083
8	85.0714	16.5876	79.8333	12.2314	157	112.057
9	85.1429	12.2717	83.0833	15.2223	171.889	122.58
10	79.1429	13.4956	83	14.2382	175.333	125.016
11	82.7857	13.4403	86.9167	11.1719	190.222	127.062
12	79.3571	9.47553	94.25	36.8711	194.111	134.082

## Sheet: Glucose SS versus PS
Day	CB-F	CB-F (SD)	CB-F (SE)	CB-P	CB-P (SD)	CB-P (SE)	STZ-F	STZ-50 F (SD)	STZ-50 F (SE)	STZ-P	STZ-50 P (SD)	STZ-50 P (SE)	STZ-70 F	STZ-70 F (SD)	STZ-70 F (SE)	STZ-70 P	STZ-70 P (SD)	STZ-70 P (SE)
1	73.9286	14.4779	3.86938	105	17.1599	4.58617	97.1667	64.4428	18.603	275.667	141.54	40.859	163.667	74.6224	24.8741	354	156.009	52.0029
2	86.3571	13.3624	3.57126	112.929	22.283	5.95539	89.9167	34.3603	9.91896	289.333	126.664	36.5649	133.556	73.4781	24.4927	339	155.42	51.8068
3	86.6429	14.0253	3.74842	131.071	31.563	8.43558	100.417	30.4256	8.78313	326.25	130.375	37.636	134.889	75.9777	25.3259	377.444	174.826	58.2752
4	88.0714	15.102	4.03619	120.429	33.8179	9.03821	96.5	20.3537	5.8756	280.167	105.083	30.335	131.111	72.6953	24.2318	364.333	174.174	58.0582
5	83.7857	12.3611	3.30364	123.143	34.438	9.20395	86.0833	8.93876	2.5804	290.583	111.357	32.1461	114.222	44.6256	14.8752	391.222	182.764	60.9213
6	86.7857	11.0883	2.96347	120.786	26.49	7.07975	87.0833	10.1306	2.92445	295.167	117.585	33.9438	143.556	72.0783	24.0261	377	186.568	62.1895
7	88.7143	17.2289	4.60462	115.714	29.6555	7.92577	83.75	12.0765	3.48617	289.083	118.856	34.3108	163	117.083	39.0278	369.111	171.201	57.0671
8	85.0714	16.5876	4.43322	118.429	32.2078	8.60789	79.8333	12.2314	3.53089	286.083	119.627	34.5334	157	112.057	37.3523	356.889	162.909	54.303
9	85.1429	12.2717	3.27974	118.571	28.0843	7.50583	83.0833	15.2223	4.39431	275.667	121.773	35.1528	171.889	122.58	40.86	370.111	190.761	63.5871
10	79.1429	13.4956	3.60686	105.929	12.4187	3.31905	83	14.2382	4.11022	258.5	99.6799	28.7751	175.333	125.016	41.672	343.556	172.867	57.6224
11	82.7857	13.4403	3.59208	107.571	15.8537	4.23709	86.9167	11.1719	3.22504	280.333	110.465	31.8884	190.222	127.062	42.3539	355.444	182.093	60.6976
12	79.3571	9.47553	2.53244	104.286	10.3733	2.77237	94.25	36.8711	10.6438	253.25	115.4	33.3131	194.111	134.082	44.6938	342.778	174.261	58.087
