# Supplementary material for: Driver versus navigator causation in biology: the case of insulin and fasting glucose
Source: PeerJ. 2020 Dec 11;8:e10396. doi: 10.7717/peerj.10396 (PMC7735078; doi:10.7717/peerj.10396)
Supplement: Supplemental Information 11 [file peerj-08-10396-s011.xlsx]

## Sheet: fasting
0 minutes/fasting							0 minutes
Control			Inhibition/KO				IRKO-Control			Control
mean	SEM	95% CI	mean	SEM	95% CI		(IRKO-Con)-95%CI IRKO	(IRKO-Con)	(IRKO-Con)+95%CI IRKO	-95%CI Con	Control	+95%CI Con
85.23	18.754	36.7578	100.575	11.932	23.3867		-8.04172	15.345	38.7317	-36.7578	0	36.7578
221.331	13.076	25.629	254.528	20.121	39.4372		-6.24016	33.197	72.6342	-25.629	0	25.629
251.404	11.663	22.8595	250.108	32.397	63.4981		-64.7941	-1.296	62.2021	-22.8595	0	22.8595
98.949	9.425	18.473	123.295	10.997	21.5541		2.79188	24.346	45.9001	-18.473	0	18.473
122.615	13.079	25.6348	129.972	16.349	32.044		-24.687	7.357	39.401	-25.6348	0	25.6348
126.478	13.882	27.2087	168.123	10.797	21.1621		20.4829	41.645	62.8071	-27.2087	0	27.2087
141.753	14.182	27.7967	154.645	11.598	22.7321		-9.84008	12.892	35.6241	-27.7967	0	27.7967
146.524	6.417	12.5773	103.743	8.556	16.7698		-59.5508	-42.781	-26.0112	-12.5773	0	12.5773
130.135	8.974	17.589	126.285	8.97	17.5812		-21.4312	-3.85	13.7312	-17.589	0	17.589
166.667	11.111	21.7776	174.074	11.111	21.7776		-14.3706	7.407	29.1846	-21.7776	0	21.7776
133.751	12.278	24.0649	143.559	12.262	24.0335		-14.2255	9.808	33.8415	-24.0649	0	24.0649
120.128	12.78	25.0488	125.24	10.223	20.0371		-14.9251	5.112	25.1491	-25.0488	0	25.0488
182.65	11.658	22.8497	182.642	10.363	20.3115		-20.3195	-0.008	20.3035	-22.8497	0	22.8497
136.556	12.084	23.6846	138.973	10.876	21.317		-18.9	2.417	23.734	-23.6846	0	23.6846
108.703	20.067	39.3313	103.679	20.071	39.3392		-44.3632	-5.024	34.3152	-39.3313	0	39.3313
102.318	23.103	45.2819	99.01	31.353	61.4519		-64.7599	-3.308	58.1439	-45.2819	0	45.2819
110.574	28.845	56.5362	160.259	17.628	34.5509		15.1341	49.685	84.2359	-56.5362	0	56.5362
189.356	27.227	53.3649	214.109	38.366	75.1974		-50.4444	24.753	99.9504	-53.3649	0	53.3649
IRKO-Control			Control				Fasting
(IRKO-Con)-95%CI IRKO	(IRKO-Con)	(IRKO-Con)+95%CI IRKO	-95%CI Con	Control	+95%CI Con		Control	IDE
-8.04172	15.345	38.7317	-36.7578	0	36.7578	1	-36.7578	-8.04172	1	16 hours
-6.24016	33.197	72.6342	-25.629	0	25.629	2	0	15.345	1
-64.7941	-1.296	62.2021	-22.8595	0	22.8595	3	36.7578	38.7317	1
2.79188	24.346	45.9001	-18.473	0	18.473	4
-24.687	7.357	39.401	-25.6348	0	25.6348	5	-25.629	-6.24016	2	6 hours
20.4829	41.645	62.8071	-27.2087	0	27.2087	6	0	33.197	2
-9.84008	12.892	35.6241	-27.7967	0	27.7967	7	25.629	72.6342	2
-59.5508	-42.781	-26.0112	-12.5773	0	12.5773	8
-21.4312	-3.85	13.7312	-17.589	0	17.589	9	-22.8595	-64.7941	3	6 hours
-14.3706	7.407	29.1846	-21.7776	0	21.7776	10	0	-1.296	3
-14.2255	9.808	33.8415	-24.0649	0	24.0649	11	22.8595	62.2021	3
-14.9251	5.112	25.1491	-25.0488	0	25.0488	12
-20.3195	-0.008	20.3035	-22.8497	0	22.8497	13	-18.473	2.79188	4	6 hours
-18.9	2.417	23.734	-23.6846	0	23.6846	14	0	24.346	4
-44.3632	-5.024	34.3152	-39.3313	0	39.3313	15	18.473	45.9001	4
-64.7599	-3.308	58.1439	-45.2819	0	45.2819	16
15.1341	49.685	84.2359	-56.5362	0	56.5362	17	-25.6348	-24.687	5	6 hours
-50.4444	24.753	99.9504	-53.3649	0	53.3649	18	0	7.357	5
							25.6348	39.401	5
							-27.2087	20.4829	6	6 hours
							0	41.645	6
							27.2087	62.8071	6
							-27.7967	-9.84008	7	6 hours
							0	12.892	7
							27.7967	35.6241	7
							-12.5773	-59.5508	8	ON
							0	-42.781	8
							12.5773	-26.0112	8
							-17.589	-21.4312	9	14 hours
							0	-3.85	9
							17.589	13.7312	9
							-21.7776	-14.3706	10	14 hours
							0	7.407	10
							21.7776	29.1846	10
							-24.0649	-14.2255	11	14 hours
							0	9.808	11
							24.0649	33.8415	11
							-25.0488	-14.9251	12	14 hours
							0	5.112	12
							25.0488	25.1491	12
							-22.8497	-20.3195	13	14 hours
							0	-0.008	13
							22.8497	20.3035	13
							-23.6846	-18.9	14	14 hours
							0	2.417	14
							23.6846	23.734	14
							-39.3313	-44.3632	15	6 to 9 hours
							0	-5.024	15
							39.3313	34.3152	15
							-45.2819	-64.7599	16	6 to 9 hours
							0	-3.308	16
							45.2819	58.1439	16
							-56.5362	15.1341	17	6 to 9 hours
							0	49.685	17
							56.5362	84.2359	17
							-53.3649	-50.4444	18	ON
							0	24.753	18
							53.3649	99.9504	18

## Sheet: 15 minutes
15 minutes/fed							15 minutes
Control			Inhibition/KO				IRKO-Control			Control
mean	SEM	95% CI	mean	SEM	95% CI		(IRKO-Con)-95%CI IRKO	(IRKO-Con)	(IRKO-Con)+95%CI IRKO	-95%CI Con	Control	+95%CI Con
345.797	11.928	23.3789	388.418	18.75	36.75		5.871	42.621	79.371	-23.3789	0	23.3789
261.486	21.126	41.407	342.974	30.185	59.1626		22.3254	81.488	140.651	-41.407	0	41.407
377.106	18.143	35.5603	356.371	31.102	60.9599		-81.6949	-20.735	40.2249	-35.5603	0	35.5603
187.628	7.853	15.3919	237.106	23.562	46.1815		3.29648	49.478	95.6595	-15.3919	0	15.3919
223.091	15.531	30.4408	256.605	13.899	27.242		6.27196	33.514	60.756	-30.4408	0	30.4408
365.553	13.882	27.2087	462.725	21.594	42.3242		54.8478	97.172	139.496	-27.2087	0	27.2087
301.874	20.613	40.4015	353.42	14.169	27.7712		23.7748	51.546	79.3172	-40.4015	0	40.4015
327.273	17.112	33.5395	240.642	19.252	37.7339		-124.365	-86.631	-48.8971	-33.5395	0	33.5395
313.62	12.812	25.1115	261.059	17.949	35.18		-87.741	-52.561	-17.381	-25.1115	0	25.1115
337.037	18.519	36.2972	279.012	18.519	36.2972		-94.3222	-58.025	-21.7278	-36.2972	0	36.2972
335.9	29.447	57.7161	302.764	12.286	24.0806		-57.2166	-33.136	-9.05544	-57.7161	0	57.7161
300.319	17.891	35.0664	301.597	17.892	35.0683		-33.7903	1.278	36.3463	-35.0664	0	35.0664
372.097	20.725	40.621	302.157	15.544	30.4662		-100.406	-69.94	-39.4738	-40.621	0	40.621
329.909	15.71	30.7916	283.988	13.293	26.0543		-71.9753	-45.921	-19.8667	-30.7916	0	30.7916
15 minutes
IRKO-Control			Control				15 minutes
(IRKO-Con)-95%CI IRKO	(IRKO-Con)	(IRKO-Con)+95%CI IRKO	-95%CI Con	Control	+95%CI Con		Control	IDE
5.871	42.621	79.371	-23.3789	0	23.3789	1	-23.3789	5.871	1
22.3254	81.488	140.651	-41.407	0	41.407	2	0	42.621	1
-81.6949	-20.735	40.2249	-35.5603	0	35.5603	3	23.3789	79.371	1
3.29648	49.478	95.6595	-15.3919	0	15.3919	4
6.27196	33.514	60.756	-30.4408	0	30.4408	5	-41.407	22.3254	2
54.8478	97.172	139.496	-27.2087	0	27.2087	6	0	81.488	2
23.7748	51.546	79.3172	-40.4015	0	40.4015	7	41.407	140.651	2
-124.365	-86.631	-48.8971	-33.5395	0	33.5395	8
-87.741	-52.561	-17.381	-25.1115	0	25.1115	9	-35.5603	-81.6949	3
-94.3222	-58.025	-21.7278	-36.2972	0	36.2972	10	0	-20.735	3
-57.2166	-33.136	-9.05544	-57.7161	0	57.7161	11	35.5603	40.2249	3
-33.7903	1.278	36.3463	-35.0664	0	35.0664	12
-100.406	-69.94	-39.4738	-40.621	0	40.621	13	-15.3919	3.29648	4
-71.9753	-45.921	-19.8667	-30.7916	0	30.7916	14	0	49.478	4
							15.3919	95.6595	4
							-30.4408	6.27196	5
							0	33.514	5
							30.4408	60.756	5
							-27.2087	54.8478	6
							0	97.172	6
							27.2087	139.496	6
							-40.4015	23.7748	7
							0	51.546	7
							40.4015	79.3172	7
							-33.5395	-124.365	8
							0	-86.631	8
							33.5395	-48.8971	8
							-25.1115	-87.741	9
							0	-52.561	9
							25.1115	-17.381	9
							-36.2972	-94.3222	10
							0	-58.025	10
							36.2972	-21.7278	10
							-57.7161	-57.2166	11
							0	-33.136	11
							57.7161	-9.05544	11
							-35.0664	-33.7903	12
							0	1.278	12
							35.0664	36.3463	12
							-40.621	-100.406	13
							0	-69.94	13
							40.621	-39.4738	13
							-30.7916	-71.9753	14
							0	-45.921	14
							30.7916	-19.8667	14
0 minutes/fasting
	Control				Inhibition/KO
	mean	95% CI	upper bound	lower bound	mean	95% CI	upper bound	lower bound	IRKO > control	IRKO< Control
1	85.23	36.7578	121.988	48.4722	100.575	23.3867	123.962	77.1883	0	0
2	221.331	25.629	246.96	195.702	254.528	39.4372	293.965	215.091	0	0
3	251.404	22.8595	274.263	228.545	250.108	63.4981	313.606	186.61	0	0
4	98.949	18.473	117.422	80.476	123.295	21.5541	144.849	101.741	0	0
5	122.615	25.6348	148.25	96.9802	129.972	32.044	162.016	97.928	0	0
6	126.478	27.2087	153.687	99.2693	168.123	21.1621	189.285	146.961	0	0
7	141.753	27.7967	169.55	113.956	154.645	22.7321	177.377	131.913	0	0
8	146.524	12.5773	159.101	133.947	103.743	16.7698	120.513	86.9732	0	1
9	130.135	17.589	147.724	112.546	126.285	17.5812	143.866	108.704	0	0
10	166.667	21.7776	188.445	144.889	174.074	21.7776	195.852	152.296	0	0
11	133.751	24.0649	157.816	109.686	143.559	24.0335	167.593	119.525	0	0
12	120.128	25.0488	145.177	95.0792	125.24	20.0371	145.277	105.203	0	0
13	182.65	22.8497	205.5	159.8	182.642	20.3115	202.953	162.331	0	0
14	136.556	23.6846	160.241	112.871	138.973	21.317	160.29	117.656	0	0
15	108.703	39.3313	148.034	69.3717	103.679	39.3392	143.018	64.3398	0	0
16	102.318	45.2819	147.6	57.0361	99.01	61.4519	160.462	37.5581	0	0
17	110.574	56.5362	167.11	54.0378	160.259	34.5509	194.81	125.708	0	0
18	189.356	53.3649	242.721	135.991	214.109	75.1974	289.306	138.912	0	0
									0	1

## Sheet: 30 minutes
30 minutes/fed							30 minutes
Control			Inhibition/KO				IRKO-Control			Control
mean	SEM	95%CI	mean	SEM	95% CI		(IRKO-Con)-95%CI IRKO	(IRKO-Con)	(IRKO-Con)+95%CI IRKO	-95%CI Con	Control	+95%CI Con
316.611	11.932	23.3867	446.159	22.159	43.4316	1	86.1164	129.548	172.98	-23.3867	0	23.3867
291.584	20.119	39.4332	411.304	19.114	37.4634	2	82.2566	119.72	157.183	-39.4332	0	39.4332
535.205	44.06	86.3576	478.186	34.989	68.5784	3	-125.597	-57.019	11.5594	-86.3576	0	86.3576
164.789	8.638	16.9305	258.244	18.848	36.9421	4	56.5129	93.455	130.397	-16.9305	0	16.9305
258.99	7.358	14.4217	274.52	12.263	24.0355	5	-8.50548	15.53	39.5655	-14.4217	0	14.4217
385.604	12.339	24.1844	498.201	15.424	30.231	6	82.366	112.597	142.828	-24.1844	0	24.1844
284.16	12.881	25.2468	382.104	18.035	35.3486	7	62.5954	97.944	133.293	-25.2468	0	25.2468
281.283	23.53	46.1188	201.07	20.321	39.8292	8	-120.042	-80.213	-40.3838	-46.1188	0	46.1188
294.545	15.377	30.1389	243.266	16.663	32.6595	9	-83.9385	-51.279	-18.6195	-30.1389	0	30.1389
344.444	18.519	36.2972	246.914	25.926	50.815	10	-148.345	-97.53	-46.715	-36.2972	0	36.2972
368.734	25.758	50.4857	358.895	20.859	40.8836	11	-50.7226	-9.839	31.0446	-50.4857	0	50.4857
311.821	21.725	42.581	357.827	35.783	70.1347	12	-24.1287	46.006	116.141	-42.581	0	42.581
394.438	18.135	35.5446	314.127	11.658	22.8497	13	-103.161	-80.311	-57.4613	-35.5446	0	35.5446
362.538	24.169	47.3712	334.743	14.501	28.422	14	-56.217	-27.795	0.62696	-47.3712	0	47.3712
189.385	33.449	65.56	186.037	51.832	101.591	15	-104.939	-3.348	98.2427	-65.56	0	65.56
234.738	52.802	103.492	307.345	51.152	100.258	16	-27.6509	72.607	172.865	-103.492	0	103.492
199.521	68.916	135.075	387.015	38.461	75.3836	17	112.11	187.494	262.878	-135.075	0	135.075
346.535	28.466	55.7934	393.564	22.278	43.6649	18	3.36412	47.029	90.6939	-55.7934	0	55.7934
30 minutes
	IRKO-Control			Control				30 minutes
	(IRKO-Con)-95%CI IRKO	(IRKO-Con)	(IRKO-Con)+95%CI IRKO	-95%CI Con	Control	+95%CI Con		Control	IDE
1	86.1164	129.548	172.98	-23.3867	0	23.3867		-23.3867	86.1164	1
2	82.2566	119.72	157.183	-39.4332	0	39.4332		0	129.548	1
3	-125.597	-57.019	11.5594	-86.3576	0	86.3576		23.3867	172.98	1
4	56.5129	93.455	130.397	-16.9305	0	16.9305
5	-8.50548	15.53	39.5655	-14.4217	0	14.4217		-39.4332	82.2566	2
6	82.366	112.597	142.828	-24.1844	0	24.1844		0	119.72	2
7	62.5954	97.944	133.293	-25.2468	0	25.2468		39.4332	157.183	2
8	-120.042	-80.213	-40.3838	-46.1188	0	46.1188
9	-83.9385	-51.279	-18.6195	-30.1389	0	30.1389		-86.3576	-125.597	3
10	-148.345	-97.53	-46.715	-36.2972	0	36.2972		0	-57.019	3
11	-50.7226	-9.839	31.0446	-50.4857	0	50.4857		86.3576	11.5594	3
12	-24.1287	46.006	116.141	-42.581	0	42.581
13	-103.161	-80.311	-57.4613	-35.5446	0	35.5446		-16.9305	56.5129	4
14	-56.217	-27.795	0.62696	-47.3712	0	47.3712		0	93.455	4
15	-104.939	-3.348	98.2427	-65.56	0	65.56		16.9305	130.397	4
16	-27.6509	72.607	172.865	-103.492	0	103.492
17	112.11	187.494	262.878	-135.075	0	135.075		-14.4217	-8.50548	5
18	3.36412	47.029	90.6939	-55.7934	0	55.7934		0	15.53	5
								14.4217	39.5655	5
								-24.1844	82.366	6
								0	112.597	6
								24.1844	142.828	6
								-25.2468	62.5954	7
								0	97.944	7
								25.2468	133.293	7
								-46.1188	-120.042	8
								0	-80.213	8
								46.1188	-40.3838	8
								-30.1389	-83.9385	9
								0	-51.279	9
								30.1389	-18.6195	9
								-36.2972	-148.345	10
								0	-97.53	10
								36.2972	-46.715	10
								-50.4857	-50.7226	11
								0	-9.839	11
								50.4857	31.0446	11
								-42.581	-24.1287	12
								0	46.006	12
								42.581	116.141	12
								-35.5446	-103.161	13
								0	-80.311	13
								35.5446	-57.4613	13
								-47.3712	-56.217	14
								0	-27.795	14
								47.3712	0.62696	14
								-65.56	-104.939	15
								0	-3.348	15
								65.56	98.2427	15
								-103.492	-27.6509	16
								0	72.607	16
								103.492	172.865	16
								-135.075	112.11	17
								0	187.494	17
								135.075	262.878	17
								-55.7934	3.36412	18
								0	47.029	18
								55.7934	90.6939	18

## Sheet: 60 minutes
60 minutes/fed							60 minutes
Control			Inhibition/KO				IRKO-Control			Control
mean	SEM	95%CI	mean	SEM	95% CI		(IRKO-Con)-95%CI IRKO	(IRKO-Con)	(IRKO-Con)+95%CI IRKO	-95%CI Con	Control	+95%CI Con
186.653	11.927	23.3769	292.326	17.042	33.4023	1	72.2707	105.673	139.075	-23.3769	0	23.3769
204.898	13.076	25.629	245.137	22.133	43.3807	2	-3.14168	40.239	83.6197	-25.629	0	25.629
256.587	16.846	33.0182	251.404	29.806	58.4198	3	-63.6028	-5.183	53.2368	-33.0182	0	33.0182
123.82	9.427	18.4769	200.785	29.055	56.9478	4	20.0172	76.965	133.913	-18.4769	0	18.4769
213.896	8.174	16.021	231.058	17.168	33.6493	5	-16.4873	17.162	50.8113	-16.021	0	16.021
228.278	16.967	33.2553	297.686	13.882	27.2087	6	42.1993	69.408	96.6167	-33.2553	0	33.2553
221.652	7.726	15.143	304.121	25.779	50.5268	7	31.9422	82.469	132.996	-15.143	0	15.143
267.38	11.764	23.0574	160.428	17.112	33.5395	8	-140.492	-106.952	-73.4125	-23.0574	0	23.0574
239.732	12.817	25.1213	205.128	12.825	25.137	9	-59.741	-34.604	-9.467	-25.1213	0	25.1213
330.864	23.457	45.9757	241.975	24.692	48.3963	10	-137.285	-88.889	-40.4927	-45.9757	0	45.9757
326.397	30.675	60.123	304.312	28.228	55.3269	11	-77.4119	-22.085	33.2419	-60.123	0	60.123
213.419	11.502	22.5439	328.435	30.67	60.1132	12	54.9028	115.016	175.129	-22.5439	0	22.5439
330.326	16.831	32.9888	395.093	31.088	60.9325	13	3.83452	64.767	125.699	-32.9888	0	32.9888
333.535	21.752	42.6339	297.281	15.71	30.7916	14	-67.0456	-36.254	-5.4624	-42.6339	0	42.6339
156.374	25.079	49.1548	151.353	23.423	45.9091	15	-50.9301	-5.021	40.8881	-49.1548	0	49.1548
205.446	34.65	67.914	264.855	74.25	145.53	16	-86.121	59.409	204.939	-67.914	0	67.914
177.88	68.916	135.075	384.612	44.863	87.9315	17	118.801	206.732	294.663	-135.075	0	135.075
346.535	28.466	55.7934	393.564	22.278	43.6649	18	3.36412	47.029	90.6939	-55.7934	0	55.7934
	IRKO-Control			Control				60 minutes
	(IRKO-Con)-95%CI IRKO	(IRKO-Con)	(IRKO-Con)+95%CI IRKO	-95%CI Con	Control	+95%CI Con		Control	IDE
1	72.2707	105.673	139.075	-23.3769	0	23.3769		-23.3769	72.2707	1
2	-3.14168	40.239	83.6197	-25.629	0	25.629		0	105.673	1
3	-63.6028	-5.183	53.2368	-33.0182	0	33.0182		23.3769	139.075	1
4	20.0172	76.965	133.913	-18.4769	0	18.4769
5	-16.4873	17.162	50.8113	-16.021	0	16.021		-25.629	-3.14168	2
6	42.1993	69.408	96.6167	-33.2553	0	33.2553		0	40.239	2
7	31.9422	82.469	132.996	-15.143	0	15.143		25.629	83.6197	2
8	-140.492	-106.952	-73.4125	-23.0574	0	23.0574
9	-59.741	-34.604	-9.467	-25.1213	0	25.1213		-33.0182	-63.6028	3
10	-137.285	-88.889	-40.4927	-45.9757	0	45.9757		0	-5.183	3
11	-77.4119	-22.085	33.2419	-60.123	0	60.123		33.0182	53.2368	3
12	54.9028	115.016	175.129	-22.5439	0	22.5439
13	3.83452	64.767	125.699	-32.9888	0	32.9888		-18.4769	20.0172	4
14	-67.0456	-36.254	-5.4624	-42.6339	0	42.6339		0	76.965	4
15	-50.9301	-5.021	40.8881	-49.1548	0	49.1548		18.4769	133.913	4
16	-86.121	59.409	204.939	-67.914	0	67.914
17	118.801	206.732	294.663	-135.075	0	135.075		-16.021	-16.4873	5
18	3.36412	47.029	90.6939	-55.7934	0	55.7934		0	17.162	5
								16.021	50.8113	5
								-33.2553	42.1993	6
								0	69.408	6
								33.2553	96.6167	6
								-15.143	31.9422	7
								0	82.469	7
								15.143	132.996	7
								-23.0574	-140.492	8
								0	-106.952	8
								23.0574	-73.4125	8
								-25.1213	-59.741	9
								0	-34.604	9
								25.1213	-9.467	9
								-45.9757	-137.285	10
								0	-88.889	10
								45.9757	-40.4927	10
								-60.123	-77.4119	11
								0	-22.085	11
								60.123	33.2419	11
								-22.5439	54.9028	12
								0	115.016	12
								22.5439	175.129	12
								-32.9888	3.83452	13
								0	64.767	13
								32.9888	125.699	13
								-42.6339	-67.0456	14
								0	-36.254	14
								42.6339	-5.4624	14
								-49.1548	-50.9301	15
								0	-5.021	15
								49.1548	40.8881	15
								-67.914	-86.121	16
								0	59.409	16
								67.914	204.939	16
								-135.075	118.801	17
								0	206.732	17
								135.075	294.663	17
								-55.7934	3.36412	18
								0	47.029	18
								55.7934	90.6939	18

## Sheet: 90 minutes
90 minutes/fed							90 minutes
Control			Inhibition/KO				IRKO-Control			Control
mean	SEM	95% CI	mean	SEM	95% CI		(IRKO-Con)-95%CI IRKO	(IRKO-Con)	(IRKO-Con)+95%CI IRKO	-95%CI Con	Control	+95%CI Con
163.481	9.054	17.7458	200.704	20.121	39.4372	1	-2.21416	37.223	76.6602	-17.7458	0	17.7458
181.425	10.367	20.3193	191.793	9.071	17.7792	2	-7.41116	10.368	28.1472	-20.3193	0	20.3193
104.839	4.715	9.2414	147.249	31.415	61.5734	3	-19.1634	42.41	103.983	-9.2414	0	9.2414
173.706	6.541	12.8204	185.148	7.357	14.4197	4	-2.97772	11.442	25.8617	-12.8204	0	12.8204
115.681	13.882	27.2087	144.987	10.797	21.1621	5	8.14388	29.306	50.4681	-27.2087	0	27.2087
172.043	10.303	20.1939	218.435	24.485	47.9906	6	-1.5986	46.392	94.3826	-20.1939	0	20.1939
165.696	14.094	27.6242	163.132	10.256	20.1018	7	-22.6658	-2.564	17.5378	-27.6242	0	27.6242
265.432	16.049	31.456	245.679	27.16	53.2336	8	-72.9866	-19.753	33.4806	-31.456	0	31.456
269.345	30.674	60.121	250.933	31.886	62.4966	9	-80.9086	-18.412	44.0846	-60.121	0	60.121
157.188	6.389	12.5224	264.537	30.671	60.1152	10	47.2338	107.349	167.464	-12.5224	0	12.5224
266.2	16.824	32.975	429.42	19.43	38.0828	11	125.137	163.22	201.303	-32.975	0	32.975
259.819	27.794	54.4762	264.653	18.127	35.5289	12	-30.6949	4.834	40.3629	-54.4762	0	54.4762
130.028	21.739	42.6084	133.38	13.378	26.2209	13	-22.8689	3.352	29.5729	-42.6084	0	42.6084
172.86	28.056	54.9898	235.567	80.854	158.474	14	-95.7668	62.707	221.181	-54.9898	0	54.9898
173.88	44.877	87.9589	340.529	27.249	53.408	15	113.241	166.649	220.057	-87.9589	0	87.9589
211.634	32.179	63.0708	409.653	49.505	97.0298	16	100.989	198.019	295.049	-63.0708	0	63.0708
90 minutes
IRKO-Control			Control				90 minutes
(IRKO-Con)-95%CI IRKO	(IRKO-Con)	(IRKO-Con)+95%CI IRKO	-95%CI Con	Control	+95%CI Con		Control	IDE
-2.21416	37.223	76.6602	-17.7458	0	17.7458	1	-17.7458	-2.21416	1
-7.41116	10.368	28.1472	-20.3193	0	20.3193	2	0	37.223	1
-19.1634	42.41	103.983	-9.2414	0	9.2414	3	17.7458	76.6602	1
-2.97772	11.442	25.8617	-12.8204	0	12.8204	4
8.14388	29.306	50.4681	-27.2087	0	27.2087	5	-20.3193	-7.41116	2
-1.5986	46.392	94.3826	-20.1939	0	20.1939	6	0	10.368	2
-22.6658	-2.564	17.5378	-27.6242	0	27.6242	7	20.3193	28.1472	2
-72.9866	-19.753	33.4806	-31.456	0	31.456	8
-80.9086	-18.412	44.0846	-60.121	0	60.121	9	-9.2414	-19.1634	3
47.2338	107.349	167.464	-12.5224	0	12.5224	10	0	42.41	3
125.137	163.22	201.303	-32.975	0	32.975	11	9.2414	103.983	3
-30.6949	4.834	40.3629	-54.4762	0	54.4762	12
-22.8689	3.352	29.5729	-42.6084	0	42.6084	13	-12.8204	-2.97772	4
-95.7668	62.707	221.181	-54.9898	0	54.9898	14	0	11.442	4
113.241	166.649	220.057	-87.9589	0	87.9589	15	12.8204	25.8617	4
100.989	198.019	295.049	-63.0708	0	63.0708	16
							-27.2087	8.14388	5
							0	29.306	5
							27.2087	50.4681	5
							-20.1939	-1.5986	6
							0	46.392	6
							20.1939	94.3826	6
							-27.6242	-22.6658	7
							0	-2.564	7
							27.6242	17.5378	7
							-31.456	-72.9866	8
							0	-19.753	8
							31.456	33.4806	8
							-60.121	-80.9086	9
							0	-18.412	9
							60.121	44.0846	9
							-12.5224	47.2338	10
							0	107.349	10
							12.5224	167.464	10
							-32.975	125.137	11
							0	163.22	11
							32.975	201.303	11
							-54.4762	-30.6949	12
							0	4.834	12
							54.4762	40.3629	12
							-42.6084	-22.8689	13
							0	3.352	13
							42.6084	29.5729	13
							-54.9898	-95.7668	14
							0	62.707	14
							54.9898	221.181	14
							-87.9589	113.241	15
							0	166.649	15
							87.9589	220.057	15
							-63.0708	100.989	16
							0	198.019	16
							63.0708	295.049	16

## Sheet: 120 minutes
120 minutes/fed							120 minutes
Control			Inhibition/KO				IRKO-Control			Control
mean	SEM	95%CI	mean	SEM	95%CI		(IRKO-Con)-95%CI IRKO	(IRKO-Con)	(IRKO-Con)+95%CI IRKO	-95%CI Con	Control	+95%CI Con
102.283	13.644	26.7422	139.771	11.932	23.3867	1	14.1013	37.488	60.8747	-26.7422	0	26.7422
127.097	4.024	7.88704	162.308	12.072	23.6611	2	11.5499	35.211	58.8721	-7.88704	0	7.88704
163.283	12.959	25.3996	165.875	9.071	17.7792	3	-15.1872	2.592	20.3712	-25.3996	0	25.3996
90.572	7.853	15.3919	107.064	21.206	41.5638	4	-25.0718	16.492	58.0558	-15.3919	0	15.3919
144.959	12.266	24.0414	154.765	15.531	30.4408	5	-20.6348	9.806	40.2468	-24.0414	0	24.0414
84.833	9.255	18.1398	94.087	10.797	21.1621	6	-11.9081	9.254	30.4161	-18.1398	0	18.1398
148.202	11.592	22.7203	146.907	23.208	45.4877	7	-46.7827	-1.295	44.1927	-22.7203	0	22.7203
185.027	9.625	18.865	111.23	7.487	14.6745	8	-88.4715	-73.797	-59.1225	-18.865	0	18.865
146.785	10.256	20.1018	151.914	8.978	17.5969	9	-12.4679	5.129	22.7259	-20.1018	0	20.1018
187.654	13.581	26.6188	240.741	27.16	53.2336	10	-0.1466	53.087	106.321	-26.6188	0	26.6188
206.158	19.632	38.4787	208.612	22.093	43.3023	11	-40.8483	2.454	45.7563	-38.4787	0	38.4787
132.907	7.667	15.0273	203.195	30.671	60.1152	12	10.1728	70.288	130.403	-15.0273	0	15.0273
213.746	23.316	45.6994	435.249	32.375	63.455	13	158.048	221.503	284.958	-45.6994	0	45.6994
241.692	26.586	52.1086	241.692	19.336	37.8986	14	-37.8986	0	37.8986	-52.1086	0	52.1086
118.756	11.702	22.9359	122.096	13.378	26.2209	15	-22.8809	3.34	29.5609	-22.9359	0	22.9359
158.42	23.095	45.2662	193.073	57.756	113.202	16	-78.5488	34.653	147.855	-45.2662	0	45.2662
149.021	64.094	125.624	302.869	25.641	50.2564	17	103.592	153.848	204.104	-125.624	0	125.624
185.644	24.753	48.5159	339.109	55.693	109.158	18	44.3067	153.465	262.623	-48.5159	0	48.5159
120 minutes								120 minutes
IRKO-Control			Control					Control	IDE
	(IRKO-Con)-95%CI IRKO	(IRKO-Con)	(IRKO-Con)+95%CI IRKO	-95%CI Con	Control	+95%CI Con		-26.7422	14.1013	1
1	14.1013	37.488	60.8747	-26.7422	0	26.7422		0	37.488	1
2	11.5499	35.211	58.8721	-7.88704	0	7.88704		26.7422	60.8747	1
3	-15.1872	2.592	20.3712	-25.3996	0	25.3996
4	-25.0718	16.492	58.0558	-15.3919	0	15.3919		-7.88704	11.5499	2
5	-20.6348	9.806	40.2468	-24.0414	0	24.0414		0	35.211	2
6	-11.9081	9.254	30.4161	-18.1398	0	18.1398		7.88704	58.8721	2
7	-46.7827	-1.295	44.1927	-22.7203	0	22.7203
8	-88.4715	-73.797	-59.1225	-18.865	0	18.865		-25.3996	-15.1872	3
9	-12.4679	5.129	22.7259	-20.1018	0	20.1018		0	2.592	3
10	-0.1466	53.087	106.321	-26.6188	0	26.6188		25.3996	20.3712	3
11	-40.8483	2.454	45.7563	-38.4787	0	38.4787
12	10.1728	70.288	130.403	-15.0273	0	15.0273		-15.3919	-25.0718	4
13	158.048	221.503	284.958	-45.6994	0	45.6994		0	16.492	4
14	-37.8986	0	37.8986	-52.1086	0	52.1086		15.3919	58.0558	4
15	-22.8809	3.34	29.5609	-22.9359	0	22.9359
16	-78.5488	34.653	147.855	-45.2662	0	45.2662		-24.0414	-20.6348	5
17	103.592	153.848	204.104	-125.624	0	125.624		0	9.806	5
18	44.3067	153.465	262.623	-48.5159	0	48.5159		24.0414	40.2468	5
								-18.1398	-11.9081	6
								0	9.254	6
								18.1398	30.4161	6
								-22.7203	-46.7827	7
								0	-1.295	7
								22.7203	44.1927	7
								-18.865	-88.4715	8
								0	-73.797	8
								18.865	-59.1225	8
								-20.1018	-12.4679	9
								0	5.129	9
								20.1018	22.7259	9
								-26.6188	-0.1466	10
								0	53.087	10
								26.6188	106.321	10
								-38.4787	-40.8483	11
								0	2.454	11
								38.4787	45.7563	11
								-15.0273	10.1728	12
								0	70.288	12
								15.0273	130.403	12
								-45.6994	158.048	13
								0	221.503	13
								45.6994	284.958	13
								-52.1086	-37.8986	14
								0	0	14
								52.1086	37.8986	14
								-22.9359	-22.8809	15
								0	3.34	15
								22.9359	29.5609	15
								-45.2662	-78.5488	16
								0	34.653	16
								45.2662	147.855	16
								-125.624	103.592	17
								0	153.848	17
								125.624	204.104	17
								-48.5159	44.3067	18
								0	153.465	18
								48.5159	262.623	18

## Sheet: 95% CI
Sr. No.	0 minutes/fasting						15 minutes/fed						30 minutes/fed						60 minutes/fed						90 minutes/fed						120 minutes/fed											Total
	Control			Inhibition/KO			Control			Inhibition/KO			Control			Inhibition/KO			Control			Inhibition/KO			Control			Inhibition/KO			Control			Inhibition/KO								18
	mean	SEM	95% CI	mean	SEM	95% CI	mean	SEM	95%CI	mean	SEM	95% CI	mean	SEM	95%CI	mean	SEM	95% CI	mean	SEM	95%CI	mean	SEM	95% CI	mean	SEM	95% CI	mean	SEM	95% CI	mean	SEM	95%CI	mean	SEM	95%CI						14
1	85.23	18.754	36.7578	100.575	11.932	23.3867	345.797	11.928	23.3789	388.418	18.75	19.875	316.611	11.932	23.3867	446.159	22.159	43.4316	186.653	11.927	23.3769	292.326	17.042	33.4023							102.283	13.644	26.7422	139.771	11.932	23.3867						18
2	221.331	13.076	25.629	254.528	20.121	39.4372	261.486	21.126	41.407	342.974	30.185	31.9961	291.584	20.119	39.4332	411.304	19.114	37.4634	204.898	13.076	25.629	245.137	22.133	43.3807	163.481	9.054	17.7458	200.704	20.121	39.4372	127.097	4.024	7.88704	162.308	12.072	23.6611						18
3	251.404	11.663	22.8595	250.108	32.397	63.4981	377.106	18.143	35.5603	356.371	31.102	32.9681	535.205	44.06	86.3576	478.186	34.989	68.5784	256.587	16.846	33.0182	251.404	29.806	58.4198	181.425	10.367	20.3193	191.793	9.071	17.7792	163.283	12.959	25.3996	165.875	9.071	17.7792						16
4	98.949	9.425	18.473	123.295	10.997	21.5541	187.628	7.853	15.3919	237.106	23.562	24.9757	164.789	8.638	16.9305	258.244	18.848	36.9421	123.82	9.427	18.4769	200.785	29.055	56.9478	104.839	4.715	9.2414	147.249	31.415	61.5734	90.572	7.853	15.3919	107.064	21.206	41.5638						18
5	122.615	13.079	25.6348	129.972	16.349	32.044	223.091	15.531	30.4408	256.605	13.899	14.7329	258.99	7.358	14.4217	274.52	12.263	24.0355	213.896	8.174	16.021	231.058	17.168	33.6493	173.706	6.541	12.8204	185.148	7.357	14.4197	144.959	12.266	24.0414	154.765	15.531	30.4408
6	126.478	13.882	27.2087	168.123	10.797	21.1621	365.553	13.882	27.2087	462.725	21.594	22.8896	385.604	12.339	24.1844	498.201	15.424	30.231	228.278	16.967	33.2553	297.686	13.882	27.2087	115.681	13.882	27.2087	144.987	10.797	21.1621	84.833	9.255	18.1398	94.087	10.797	21.1621						Total
7	141.753	14.182	27.7967	154.645	11.598	22.7321	301.874	20.613	40.4015	353.42	14.169	15.0191	284.16	12.881	25.2468	382.104	18.035	35.3486	221.652	7.726	15.143	304.121	25.779	50.5268	172.043	10.303	20.1939	218.435	24.485	47.9906	148.202	11.592	22.7203	146.907	23.208	45.4877						18
8	146.524	6.417	12.5773	103.743	8.556	16.7698	327.273	17.112	33.5395	240.642	19.252	20.4071	281.283	23.53	46.1188	201.07	20.321	39.8292	267.38	11.764	23.0574	160.428	17.112	33.5395			0			0	185.027	9.625	18.865	111.23	7.487	14.6745						14
9	130.135	8.974	17.589	126.285	8.97	17.5812	313.62	12.812	25.1115	261.059	17.949	19.0259	294.545	15.377	30.1389	243.266	16.663	32.6595	239.732	12.817	25.1213	205.128	12.825	25.137	165.696	14.094	27.6242	163.132	10.256	20.1018	146.785	10.256	20.1018	151.914	8.978	17.5969						18
10	166.667	11.111	21.7776	174.074	11.111	21.7776	337.037	18.519	36.2972	279.012	18.519	19.6301	344.444	18.519	36.2972	246.914	25.926	50.815	330.864	23.457	45.9757	241.975	24.692	48.3963	265.432	16.049	31.456	245.679	27.16	53.2336	187.654	13.581	26.6188	240.741	27.16	53.2336						18
11	133.751	12.278	24.0649	143.559	12.262	24.0335	335.9	29.447	57.7161	302.764	12.286	13.0232	368.734	25.758	50.4857	358.895	20.859	40.8836	326.397	30.675	60.123	304.312	28.228	55.3269	269.345	30.674	60.121	250.933	31.886	62.4966	206.158	19.632	38.4787	208.612	22.093	43.3023						16
12	120.128	12.78	25.0488	125.24	10.223	20.0371	300.319	17.891	35.0664	301.597	17.892	18.9655	311.821	21.725	42.581	357.827	35.783	70.1347	213.419	11.502	22.5439	328.435	30.67	60.1132	157.188	6.389	12.5224	264.537	30.671	60.1152	132.907	7.667	15.0273	203.195	30.671	60.1152			2	1	15	18
13	182.65	11.658	22.8497	182.642	10.363	20.3115	372.097	20.725	40.621	302.157	15.544	16.4766	394.438	18.135	35.5446	314.127	11.658	22.8497	330.326	16.831	32.9888	395.093	31.088	60.9325	266.2	16.824	32.975	429.42	19.43	38.0828	213.746	23.316	45.6994	435.249	32.375	63.455
14	136.556	12.084	23.6846	138.973	10.876	21.317	329.909	15.71	30.7916	283.988	13.293	14.0906	362.538	24.169	47.3712	334.743	14.501	28.422	333.535	21.752	42.6339	297.281	15.71	30.7916	259.819	27.794	54.4762	264.653	18.127	35.5289	241.692	26.586	52.1086	241.692	19.336	37.8986
15	108.703	20.067	39.3313	103.679	20.071	39.3392							189.385	33.449	65.56	186.037	51.832	101.591	156.374	25.079	49.1548	151.353	23.423	45.9091	130.028	21.739	42.6084	133.38	13.378	26.2209	118.756	11.702	22.9359	122.096	13.378	26.2209
16	102.318	23.103	45.2819	99.01	31.353	61.4519							234.738	52.802	103.492	307.345	51.152	100.258	205.446	34.65	67.914	264.855	74.25	145.53	172.86	28.056	54.9898	235.567	80.854	158.474	158.42	23.095	45.2662	193.073	57.756	113.202
17	110.574	28.845	56.5362	160.259	17.628	34.5509							199.521	68.916	135.075	387.015	38.461	75.3836	177.88	68.916	135.075	384.612	44.863	87.9315	173.88	44.877	87.9589	340.529	27.249	53.408	149.021	64.094	125.624	302.869	25.641	50.2564
18	189.356	27.227	53.3649	214.109	38.366	75.1974							346.535	28.466	55.7934	393.564	22.278	43.6649	346.535	28.466	55.7934	393.564	22.278	43.6649	211.634	32.179	63.0708	409.653	49.505	97.0298	185.644	24.753	48.5159	339.109	55.693	109.158
0 minutes/fasting
	Control				Inhibition/KO
	mean	95% CI	upper bound	lower bound	mean	95% CI	upper bound	lower bound	IDE > control	IDE< Control		IDE mean > Control	IDE mean < Control
1	85.23	36.7578	121.988	48.4722	100.575	23.3867	123.962	77.1883	0	0		1	0
2	221.331	25.629	246.96	195.702	254.528	39.4372	293.965	215.091	0	0		1	0
3	251.404	22.8595	274.263	228.545	250.108	63.4981	313.606	186.61	0	0		0	1
4	98.949	18.473	117.422	80.476	123.295	21.5541	144.849	101.741	0	0		1	0
5	122.615	25.6348	148.25	96.9802	129.972	32.044	162.016	97.928	0	0		1	0
6	126.478	27.2087	153.687	99.2693	168.123	21.1621	189.285	146.961	0	0		1	0
7	141.753	27.7967	169.55	113.956	154.645	22.7321	177.377	131.913	0	0		1	0
8	146.524	12.5773	159.101	133.947	103.743	16.7698	120.513	86.9732	0	1		0	1
9	130.135	17.589	147.724	112.546	126.285	17.5812	143.866	108.704	0	0		0	1
10	166.667	21.7776	188.445	144.889	174.074	21.7776	195.852	152.296	0	0		1	0
11	133.751	24.0649	157.816	109.686	143.559	24.0335	167.593	119.525	0	0		1	0
12	120.128	25.0488	145.177	95.0792	125.24	20.0371	145.277	105.203	0	0		1	0
13	182.65	22.8497	205.5	159.8	182.642	20.3115	202.953	162.331	0	0		0	1
14	136.556	23.6846	160.241	112.871	138.973	21.317	160.29	117.656	0	0		1	0
15	108.703	39.3313	148.034	69.3717	103.679	39.3392	143.018	64.3398	0	0		0	1
16	102.318	45.2819	147.6	57.0361	99.01	61.4519	160.462	37.5581	0	0		0	1
17	110.574	56.5362	167.11	54.0378	160.259	34.5509	194.81	125.708	0	0		1	0
18	189.356	53.3649	242.721	135.991	214.109	75.1974	289.306	138.912	0	0		1	0
									0	1		12	6
15 minutes												IDE mean > Control	IDE mean < Control
1	345.797	23.3789	369.176	322.418	388.418	19.875	408.293	368.543	0	0		1	0
2	261.486	41.407	302.893	220.079	342.974	31.9961	374.97	310.978	1	0		1	0
3	377.106	35.5603	412.666	341.546	356.371	32.9681	389.339	323.403	0	0		0	1
4	187.628	15.3919	203.02	172.236	237.106	24.9757	262.082	212.13	1	0		1	0
5	223.091	30.4408	253.532	192.65	256.605	14.7329	271.338	241.872	0	0		1	0
6	365.553	27.2087	392.762	338.344	462.725	22.8896	485.615	439.835	1	0		1	0
7	301.874	40.4015	342.275	261.473	353.42	15.0191	368.439	338.401	0	0		1	0
8	327.273	33.5395	360.813	293.733	240.642	20.4071	261.049	220.235	0	1		0	1
9	313.62	25.1115	338.732	288.508	261.059	19.0259	280.085	242.033	0	1		0	1
10	337.037	36.2972	373.334	300.74	279.012	19.6301	298.642	259.382	0	1		0	1
11	335.9	57.7161	393.616	278.184	302.764	13.0232	315.787	289.741	0	0		0	1
12	300.319	35.0664	335.385	265.253	301.597	18.9655	320.563	282.631	0	0		1	0
13	372.097	40.621	412.718	331.476	302.157	16.4766	318.634	285.68	0	1		0	1
14	329.909	30.7916	360.701	299.117	283.988	14.0906	298.079	269.897	0	1		0	1
									3	5		7	7
30 minutes												IDE mean > Control	IDE mean < Control
1	316.611	23.3867	339.998	293.224	446.159	43.4316	489.591	402.727	1	0		1	0
2	291.584	39.4332	331.017	252.151	411.304	37.4634	448.767	373.841	1	0		1	0
3	535.205	86.3576	621.563	448.847	478.186	68.5784	546.764	409.608	0	0		0	1
4	164.789	16.9305	181.719	147.859	258.244	36.9421	295.186	221.302	1	0		1	0
5	258.99	14.4217	273.412	244.568	274.52	24.0355	298.555	250.485	0	0		1	0
6	385.604	24.1844	409.788	361.42	498.201	30.231	528.432	467.97	1	0		1	0
7	284.16	25.2468	309.407	258.913	382.104	35.3486	417.453	346.755	1	0		1	0
8	281.283	46.1188	327.402	235.164	201.07	39.8292	240.899	161.241	0	0		0	1
9	294.545	30.1389	324.684	264.406	243.266	32.6595	275.925	210.607	0	0		0	1
10	344.444	36.2972	380.741	308.147	246.914	50.815	297.729	196.099	0	1		0	1
11	368.734	50.4857	419.22	318.248	358.895	40.8836	399.779	318.011	0	0		0	1
12	311.821	42.581	354.402	269.24	357.827	70.1347	427.962	287.692	0	0		1	0
13	394.438	35.5446	429.983	358.893	314.127	22.8497	336.977	291.277	0	1		0	1
14	362.538	47.3712	409.909	315.167	334.743	28.422	363.165	306.321	0	0		0	1
15	189.385	65.56	254.945	123.825	186.037	101.591	287.628	84.4463	0	0		0	1
16	234.738	103.492	338.23	131.246	307.345	100.258	407.603	207.087	0	0		1	0
17	199.521	135.075	334.596	64.4456	387.015	75.3836	462.399	311.631	0	0		1	0
18	346.535	55.7934	402.328	290.742	393.564	43.6649	437.229	349.899	0	0		1	0
									5	2		10	8
60 minutes												IDE mean > Control	IDE mean < Control
1	186.653	23.3769	210.03	163.276	292.326	33.4023	325.728	258.924	1	0		1	0
2	204.898	25.629	230.527	179.269	245.137	43.3807	288.518	201.756	0	0		1	0
3	256.587	33.0182	289.605	223.569	251.404	58.4198	309.824	192.984	0	0		0	1
4	123.82	18.4769	142.297	105.343	200.785	56.9478	257.733	143.837	1	0		1	0
5	213.896	16.021	229.917	197.875	231.058	33.6493	264.707	197.409	0	0		1	0
6	228.278	33.2553	261.533	195.023	297.686	27.2087	324.895	270.477	1	0		1	0
7	221.652	15.143	236.795	206.509	304.121	50.5268	354.648	253.594	1	0		1	0
8	267.38	23.0574	290.437	244.323	160.428	33.5395	193.968	126.888	0	1		0	1
9	239.732	25.1213	264.853	214.611	205.128	25.137	230.265	179.991	0	0		0	1
10	330.864	45.9757	376.84	284.888	241.975	48.3963	290.371	193.579	0	0		0	1
11	326.397	60.123	386.52	266.274	304.312	55.3269	359.639	248.985	0	0		0	1
12	213.419	22.5439	235.963	190.875	328.435	60.1132	388.548	268.322	1	0		1	0
13	330.326	32.9888	363.315	297.337	395.093	60.9325	456.025	334.161	0	0		1	0
14	333.535	42.6339	376.169	290.901	297.281	30.7916	328.073	266.489	0	0		0	1
15	156.374	49.1548	205.529	107.219	151.353	45.9091	197.262	105.444	0	0		0	1
16	205.446	67.914	273.36	137.532	264.855	145.53	410.385	119.325	0	0		1	0
17	177.88	135.075	312.955	42.8046	384.612	87.9315	472.543	296.681	0	0		1	0
18	346.535	55.7934	402.328	290.742	393.564	43.6649	437.229	349.899	0	0		1	0
									5	1		11	7
90 minutes												IDE mean > Control	IDE mean < Control
1	163.481	17.7458	181.227	145.735	200.704	39.4372	240.141	161.267	0	0		1	0
2	181.425	20.3193	201.744	161.106	191.793	17.7792	209.572	174.014	0	0		1	0
3	104.839	9.2414	114.08	95.5976	147.249	61.5734	208.822	85.6756	0	0		1	0
4	173.706	12.8204	186.526	160.886	185.148	14.4197	199.568	170.728	0	0		1	0
5	115.681	27.2087	142.89	88.4723	144.987	21.1621	166.149	123.825	0	0		1	0
6	172.043	20.1939	192.237	151.849	218.435	47.9906	266.426	170.444	0	0		1	0
7	165.696	27.6242	193.32	138.072	163.132	20.1018	183.234	143.03	0	0		0	1
8	265.432	31.456	296.888	233.976	245.679	53.2336	298.913	192.445	0	0		0	1
9	269.345	60.121	329.466	209.224	250.933	62.4966	313.43	188.436	0	0		0	1
10	157.188	12.5224	169.71	144.666	264.537	60.1152	324.652	204.422	1	0		1	0
11	266.2	32.975	299.175	233.225	429.42	38.0828	467.503	391.337	1	0		1	0
12	259.819	54.4762	314.295	205.343	264.653	35.5289	300.182	229.124	0	0		1	0
13	130.028	42.6084	172.636	87.4196	133.38	26.2209	159.601	107.159	0	0		1	0
14	172.86	54.9898	227.85	117.87	235.567	158.474	394.041	77.0932	0	0		1	0
15	173.88	87.9589	261.839	85.9211	340.529	53.408	393.937	287.121	1	0		1	0
16	211.634	63.0708	274.705	148.563	409.653	97.0298	506.683	312.623	1	0		1	0
									4	0		13	3
120 minutes												IDE mean > Control	IDE mean < Control
1	102.283	26.7422	129.025	75.5408	139.771	23.3867	163.158	116.384	0	0		1	0
2	127.097	7.88704	134.984	119.21	162.308	23.6611	185.969	138.647	1	0		1	0
3	163.283	25.3996	188.683	137.883	165.875	17.7792	183.654	148.096	0	0		1	0
4	90.572	15.3919	105.964	75.1801	107.064	41.5638	148.628	65.5002	0	0		1	0
5	144.959	24.0414	169	120.918	154.765	30.4408	185.206	124.324	0	0		1	0
6	84.833	18.1398	102.973	66.6932	94.087	21.1621	115.249	72.9249	0	0		1	0
7	148.202	22.7203	170.922	125.482	146.907	45.4877	192.395	101.419	0	0		0	1
8	185.027	18.865	203.892	166.162	111.23	14.6745	125.905	96.5555	0	1		0	1
9	146.785	20.1018	166.887	126.683	151.914	17.5969	169.511	134.317	0	0		1	0
10	187.654	26.6188	214.273	161.035	240.741	53.2336	293.975	187.507	0	0		1	0
11	206.158	38.4787	244.637	167.679	208.612	43.3023	251.914	165.31	0	0		1	0
12	132.907	15.0273	147.934	117.88	203.195	60.1152	263.31	143.08	0	0		1	0
13	213.746	45.6994	259.445	168.047	435.249	63.455	498.704	371.794	1	0		1	0
14	241.692	52.1086	293.801	189.583	241.692	37.8986	279.591	203.793	0	0		0	0
15	118.756	22.9359	141.692	95.8201	122.096	26.2209	148.317	95.8751	0	0		1	0
16	158.42	45.2662	203.686	113.154	193.073	113.202	306.275	79.8712	0	0		1	0
17	149.021	125.624	274.645	23.3968	302.869	50.2564	353.125	252.613	0	0		1	0
18	185.644	48.5159	234.16	137.128	339.109	109.158	448.267	229.951	0	0		1	0
									2	1		15	2

## Sheet: Sheet2
Fasting														mean ± SE	Inhibition/KO > control	Inhibition/KO < control	KO and Control equal
	Control					Inhibition/KO								Fasting	3	1	14
	mean	SEM	upper bound	lower bound		mean	SEM	upper bound	lower bound	Inhibition/KO > control	Inhibition/KO < control			15 minutes	6	5	3
1	85.23	18.754	121.988	48.4722		100.575	11.932	123.962	77.1883	0	0			30 minutes	6	4	8
2	221.331	13.076	246.96	195.702		254.528	20.121	293.965	215.091	0	0			60 minutes	8	3	7
3	251.404	11.663	274.263	228.545		250.108	32.397	313.606	186.61	0	0			90 minutes	8	0	8
4	98.949	9.425	117.422	80.476		123.295	10.997	144.849	101.741	0	0			120 minutes	7	1	10
5	122.615	13.079	148.25	96.9802		129.972	16.349	162.016	97.928	0	0
6	126.478	13.882	153.687	99.2693		168.123	10.797	189.285	146.961	0	0			mean ± 95% CI	Inhibition/KO > control	Inhibition/KO < control	KO and Control equal
7	141.753	14.182	169.55	113.956		154.645	11.598	177.377	131.913	0	0			Fasting	0	1	17
8	146.524	6.417	159.101	133.947		103.743	8.556	120.513	86.9732	0	1			15 minutes	1	1	12
9	130.135	8.974	147.724	112.546		126.285	8.97	143.866	108.704	0	0			30 minutes	6	2	10
10	166.667	11.111	188.445	144.889		174.074	11.111	195.852	152.296	0	0			60 minutes	5	1	12
11	133.751	12.278	157.816	109.686		143.559	12.262	167.593	119.525	0	0			90 minutes	4	0	12
12	120.128	12.78	145.177	95.0792		125.24	10.223	145.277	105.203	0	0
13	182.65	11.658	205.5	159.8		182.642	10.363	202.953	162.331	0	0
14	136.556	12.084	160.241	112.871		138.973	10.876	160.29	117.656	0	0
15	108.703	20.067	148.034	69.3717		103.679	20.071	143.018	64.3398	0	0
16	102.318	23.103	147.6	57.0361		99.01	31.353	160.462	37.5581	0	0
17	110.574	28.845	167.11	54.0378		160.259	17.628	194.81	125.708	0	0
18	189.356	27.227	242.721	135.991		214.109	38.366	289.306	138.912	0	0
										0	1
15 minutes
	Control					Inhibition/KO
	mean	SEM	upper bound	lower bound		mean	SEM	upper bound	lower bound	Inhibition/KO > control	Inhibition/KO < control
1	345.797	11.928	369.176	322.418		388.418	18.75	425.168	351.668	0	0
2	261.486	21.126	302.893	220.079		342.974	30.185	402.137	283.811	0	0
3	377.106	18.143	412.666	341.546		356.371	31.102	417.331	295.411	0	0
4	187.628	7.853	203.02	172.236		237.106	23.562	283.288	190.924	0	0
5	223.091	15.531	253.532	192.65		256.605	13.899	283.847	229.363	0	0
6	365.553	13.882	392.762	338.344		462.725	21.594	505.049	420.401	1	0
7	301.874	20.613	342.275	261.473		353.42	14.169	381.191	325.649	0	0
8	327.273	17.112	360.813	293.733		240.642	19.252	278.376	202.908	0	1
9	313.62	12.812	338.732	288.508		261.059	17.949	296.239	225.879	0	0
10	337.037	18.519	373.334	300.74		279.012	18.519	315.309	242.715	0	0
11	335.9	29.447	393.616	278.184		302.764	12.286	326.845	278.683	0	0
12	300.319	17.891	335.385	265.253		301.597	17.892	336.665	266.529	0	0
13	372.097	20.725	412.718	331.476		302.157	15.544	332.623	271.691	0	0
14	329.909	15.71	360.701	299.117		283.988	13.293	310.042	257.934	0	0
										1	1
30 minutes
	Control					Inhibition/KO
	mean	SEM	upper bound	lower bound		mean	SEM	upper bound	lower bound	Inhibition/KO > control	Inhibition/KO < control
1	316.611	11.932	339.998	293.224		446.159	22.159	489.591	424	1	0
2	291.584	20.119	331.017	252.151		411.304	19.114	448.767	392.19	1	0
3	535.205	44.06	621.563	448.847		478.186	34.989	546.764	443.197	0	0
4	164.789	8.638	181.719	147.859		258.244	18.848	295.186	239.396	1	0
5	258.99	7.358	273.412	244.568		274.52	12.263	298.555	262.257	0	0
6	385.604	12.339	409.788	361.42		498.201	15.424	528.432	482.777	1	0
7	284.16	12.881	309.407	258.913		382.104	18.035	417.453	364.069	1	0
8	281.283	23.53	327.402	235.164		201.07	20.321	240.899	180.749	0	0
9	294.545	15.377	324.684	264.406		243.266	16.663	275.925	226.603	0	0
10	344.444	18.519	380.741	308.147		246.914	25.926	297.729	220.988	0	1
11	368.734	25.758	419.22	318.248		358.895	20.859	399.779	338.036	0	0
12	311.821	21.725	354.402	269.24		357.827	35.783	427.962	322.044	0	0
13	394.438	18.135	429.983	358.893		314.127	11.658	336.977	302.469	0	1
14	362.538	24.169	409.909	315.167		334.743	14.501	363.165	320.242	0	0
15	189.385	33.449	254.945	123.825		186.037	51.832	287.628	134.205	0	0
16	234.738	52.802	338.23	131.246		307.345	51.152	407.603	256.193	0	0
17	199.521	68.916	334.596	64.4456		387.015	38.461	462.399	348.554	1	0
18	346.535	28.466	402.328	290.742		393.564	22.278	437.229	371.286	0	0
										6	2
60 minutes
	Control					Inhibition/KO
	mean	SEM	upper bound	lower bound		mean	SEM	upper bound	lower bound	Inhibition/KO > control	Inhibition/KO < control
1	186.653	11.927	210.03	163.276		292.326	17.042	325.728	258.924	1	0
2	204.898	13.076	230.527	179.269		245.137	22.133	288.518	201.756	0	0
3	256.587	16.846	289.605	223.569		251.404	29.806	309.824	192.984	0	0
4	123.82	9.427	142.297	105.343		200.785	29.055	257.733	143.837	1	0
5	213.896	8.174	229.917	197.875		231.058	17.168	264.707	197.409	0	0
6	228.278	16.967	261.533	195.023		297.686	13.882	324.895	270.477	1	0
7	221.652	7.726	236.795	206.509		304.121	25.779	354.648	253.594	1	0
8	267.38	11.764	290.437	244.323		160.428	17.112	193.968	126.888	0	1
9	239.732	12.817	264.853	214.611		205.128	12.825	230.265	179.991	0	0
10	330.864	23.457	376.84	284.888		241.975	24.692	290.371	193.579	0	0
11	326.397	30.675	386.52	266.274		304.312	28.228	359.639	248.985	0	0
12	213.419	11.502	235.963	190.875		328.435	30.67	388.548	268.322	1	0
13	330.326	16.831	363.315	297.337		395.093	31.088	456.025	334.161	0	0
14	333.535	21.752	376.169	290.901		297.281	15.71	328.073	266.489	0	0
15	156.374	25.079	205.529	107.219		151.353	23.423	197.262	105.444	0	0
16	205.446	34.65	273.36	137.532		264.855	74.25	410.385	119.325	0	0
17	177.88	68.916	312.955	42.8046		384.612	44.863	472.543	296.681	0	0
18	346.535	28.466	402.328	290.742		393.564	22.278	437.229	349.899	0	0
										5	1
90 minutes
	Control					Inhibition/KO
	mean	SEM	upper bound	lower bound		mean	SEM	upper bound	lower bound	Inhibition/KO > control	Inhibition/KO < control
1	163.481	9.054	181.227	145.735		200.704	20.121	240.141	161.267	0	0
2	181.425	10.367	201.744	161.106		191.793	9.071	209.572	174.014	0	0
3	104.839	4.715	114.08	95.5976		147.249	31.415	208.822	85.6756	0	0
4	173.706	6.541	186.526	160.886		185.148	7.357	199.568	170.728	0	0
5	115.681	13.882	142.89	88.4723		144.987	10.797	166.149	123.825	0	0
6	172.043	10.303	192.237	151.849		218.435	24.485	266.426	170.444	0	0
7	165.696	14.094	193.32	138.072		163.132	10.256	183.234	143.03	0	0
8	265.432	16.049	296.888	233.976		245.679	27.16	298.913	192.445	0	0
9	269.345	30.674	329.466	209.224		250.933	31.886	313.43	188.436	0	0
10	157.188	6.389	169.71	144.666		264.537	30.671	324.652	204.422	1	0
11	266.2	16.824	299.175	233.225		429.42	19.43	467.503	391.337	1	0
12	259.819	27.794	314.295	205.343		264.653	18.127	300.182	229.124	0	0
13	130.028	21.739	172.636	87.4196		133.38	13.378	159.601	107.159	0	0
14	172.86	28.056	227.85	117.87		235.567	80.854	394.041	77.0932	0	0
15	173.88	44.877	261.839	85.9211		340.529	27.249	393.937	287.121	1	0
16	211.634	32.179	274.705	148.563		409.653	49.505	506.683	312.623	1	0
										4	0
120 minutes
	Control					Inhibition/KO
	mean	SEM	upper bound	lower bound		mean	SEM	upper bound	lower bound	Inhibition/KO > control	Inhibition/KO < control
1	102.283	13.644	129.025	75.5408		139.771	11.932	163.158	116.384	0	0
2	127.097	4.024	134.984	119.21		162.308	12.072	185.969	138.647	1	0
3	163.283	12.959	188.683	137.883		165.875	9.071	183.654	148.096	0	0
4	90.572	7.853	105.964	75.1801		107.064	21.206	148.628	65.5002	0	0
5	144.959	12.266	169	120.918		154.765	15.531	185.206	124.324	0	0
6	84.833	9.255	102.973	66.6932		94.087	10.797	115.249	72.9249	0	0
7	148.202	11.592	170.922	125.482		146.907	23.208	192.395	101.419	0	0
8	185.027	9.625	203.892	166.162		111.23	7.487	125.905	96.5555	0	1
9	146.785	10.256	166.887	126.683		151.914	8.978	169.511	134.317	0	0
10	187.654	13.581	214.273	161.035		240.741	27.16	293.975	187.507	0	0
11	206.158	19.632	244.637	167.679		208.612	22.093	251.914	165.31	0	0
12	132.907	7.667	147.934	117.88		203.195	30.671	263.31	143.08	0	0
13	213.746	23.316	259.445	168.047		435.249	32.375	498.704	371.794	1	0
14	241.692	26.586	293.801	189.583		241.692	19.336	279.591	203.793	0	0
15	118.756	11.702	141.692	95.8201		122.096	13.378	148.317	95.8751	0	0
16	158.42	23.095	203.686	113.154		193.073	57.756	306.275	79.8712	0	0
17	149.021	64.094	274.645	23.3968		302.869	25.641	353.125	252.613	0	0
18	185.644	24.753	234.16	137.128		339.109	55.693	448.267	229.951	0	0
										2	1
