# Supplementary material for: Driver versus navigator causation in biology: the case of insulin and fasting glucose
Source: PeerJ. 2020 Dec 11;8:e10396. doi: 10.7717/peerj.10396 (PMC7735078; doi:10.7717/peerj.10396)
Supplement: Supplemental Information 12 [file peerj-08-10396-s012.xlsx]

## Sheet: details of all papers
DZX and diabetes_Compilation checklist
Sr. No.	Study reference	Concentration of diazoxide used	Details of subjects/model	Fasting duration	GTT details	Sample size for GTT (placebo, treatment)	Main conlcusion of paper	Insulin levels	Figures extracted on	Data extracted on	Special notes
1	Brauner et al 2016	3.2 to 4.2 mg/kg/d for six months	Children over the age of 6 years with hypothalamic lesions (MRI) with hyperinsulinemia and obesity	ON	75g glucose given to patients orally	Different for the 3 conditions 1. before diet-17,13; 2. 5 days after treatment-17,13; 3: 2 montsh after treatment-17,12	DZX treatment in children with HP obesity did not result in a significant weight change	Insulin levels measured in all OGTTs	06.08.2018	07.08.2017
2	Pederson et al 2015	1. No OGTT of DZX treated animals, OGTTS of ob animals 2. Fasting glucose, C-peptide and glucose measured after treating WT and ob/ob mice with 1.125mg/kg DZX	CB57 mice	ON	1g/kg glucose i.p.	n=4 to 5 for each group	Obesity induced hyperinsulinemia increases inflammation in the adipose tissue	Insulin not measured in Ob OGTTs, but fasting insulin measured after DZX treatment	06.08.2018	07.08.2017
3	151. Ramanathan et al 2011	6mg/kg diazoxide	Healthy, young adults	ON	Mixed meal	n=11 for each group	Partial inhibition of insulin secretion affects glucsoe tolerance with no change in glucagon levels	Insulin measured in OGTT	06.08.2018	07.08.2018
4	197. Van Boekel et al 2008	50mg t.i.d for first 4 weeks and then the dose increased till it reached 300mg t.i.d. Study done for a total of 6 months	18 obese, men, age 30 to 50 years	ON	Standardized mixed meal	n=18 for each group	High dose DZX mediated insulin suppression is associated with clinically relevant weight reduction	Insulin measured in OGTT	08.08.2018	10.08.2018
5	206. Due et al 2007	2mg/kg/day DZX or placebo for 8 weeks	35 Overweight and obese men, age 23-54 years	ON	75g glucose in 300m water given to aptients orally	n=13 (DZX) and n=18 (placebo)	No significant differences in weight loss, body fat, REE or appetite were observed between the DZX and placebo groups	Insulin measured in OGTT	08.08.2018		No SD/SEM given in the figure. Fasting glucose and insulin values with SD given in the table. No way to get the post-feeding glucose values with the SD
6	256. Schreuder et al 2005	50/75/100 mg t.i.d for 6 days (30 minute prior to each meal)	Healthy obese and non-obese men, age 30-50 years	ON	Standardized mixed meal	n=5 (non-obese) and n=12 (obese)	DZX mediated insulin suppression is dose dependent and the efficacy of DZX is higher on non-obese subjects.	Insulin measured in OGTT	08.08.2018	09.08.2018	No SD/SEM reported in some of the OGTTs. However 0 and 120 min glucose and insulin reported in the table 2.
7	276. Alemzadeh and Tushaus 2004	150mg/kg/day, twice a day, for 8 weeks given orally	ZDF and ZL rats	18 hour fast	1g/kg glucose i.p.	n=6 for each group	DZX induced beta cell rest helped in prevention of trasition from prediatbetes to diabetes	Insulin measured in OGTT	08.08.2018	09.08.2018	Good references in the introduction
8	315. Matsuda et al 2002	30mg/kg/day for 6 weeks	Male wistar rats, 3 groups-control, STZ induced diabetic and STZ induced diabetic rats treated with DZX	12 hour fast	2g/kg glucose i.p	n=7 for each group	DZX treatment in STZ induced diabetic rats prevent the further deneration of beta cells and could be protective	Insulin measured in OGTT	09.08.2018	09.08.2018	H and E staining of rat pancreas
9	452. Leahy et al 1994	30mg/kg/day, twice a day, for 8-12 days	Male Sprague-Dawley rats, 3 groups-sham, Pancreatectomised rats treated with water, pancreatectomised rats treated eith DZX	ON	3.5g/kg oral gavage	n=4 for each group	Paper supports the hyperinsulinemia first theory. "Our results support the concept that excessive insulin secretion is a major cause of the hyperglycemia-induced loss of p-cell glucose responsiveness"	Insulin not measured during the OGTT, but insilin measured at 2 and 4 weeks post surgery	09.08.2018	09.08.2018	Suppression of insulin after DZX actually results in an increased insulin content in the pancreas (Figure 3)
10	510. Wigand and Blackard 1979	5mg/kg/d, 7 days	10 obese, no diabetic subjects, age 18-33	ON	40g/m2 body surface area glucose given orally	n=10	There is decreased number of insulin receptors in obesity. This decrease is seen because of a downregulation of the receptors and is not the primary underlying cause of IR in obesity, but a contributory role cannot be ruled out.	Insulin not measured, but insulin receptor positive cells quantified	09.08.2018	09.08.2018

## Sheet: all data 0-120
	Reference	Treatment/condition	0 minutes/fasting				120 minutes/fed				0 minutes							120 minutes
			Placebo/Before treatment		DZX		Placebo/After treatment		DZX		DZX-Control			Control				DZX-Control			Control
			mean	SEM	mean	SEM	mean	SEM	mean	SEM	(DZX-Con)-SEM Con	(DZX-Con)	(DZX-Con)+SEM Con	-SEM Con	Control	+SEM Con		(DZX-Con)-SEM Con	(DZX-Con)	(DZX-Con)+SEM Con	-SEM Con	Control	+SEM Con
1	Brauner et al 2016	before diet	79.1899	0.354913	79.1899	3.55597	113.883	1.7302	107.849	5.02019	-3.55597	0	3.55597	-0.354913	0	0.354913	1	-11.0537	-6.03352	-1.01333	-1.7302	0	1.7302
		5 days after treatment	72.8926	1.80398	90	3.3007	116.777	8.11793	121.24	9.69579	13.8067	17.1074	20.4081	-1.80398	0	1.80398	2	-5.23298	4.46281	14.1586	-8.11793	0	8.11793
		2 months after treatment	76.7951	1.45999	100.865	4.12517	108.633	5.47306	184.599	16.9349	19.9451	24.0702	28.1954	-1.45999	0	1.45999	3	59.0306	75.9655	92.9004	-5.47306	0	5.47306
2	Ramanathan et al 2011	DZX treatment	92.6225	2.24784	99.1931	3.2853	107.666	4.49568	118.386	6.22478	3.2853	6.57061	9.85591	-2.24784	0	2.24784	4	4.49568	10.7205	16.9452	-4.49568	0	4.49568
3	van Boekel et al 2008	DZX treatment	99.5172	3.31034	113.172	4.96552	101.586	6.62069	149.586	16.1379	8.68966	13.6552	18.6207	-3.31034	0	3.31034	5	31.8621	48	64.1379	-6.62069	0	6.62069
4	Due et al 2007	0 weeks	111.328		109.421		146.532		165.567		-1.9072	-1.9072	-1.9072	0	0	0		19.0353	19.0353	19.0353	0	0	0
		8 weeks	106.571		114.187		137.964		186.502		7.61656	7.61656	7.61656	0	0	0		48.5377	48.5377	48.5377	0	0	0
5	Schreuder et al 2005	DZX 50mg	106.2	3.6	100.8	1.8	102.6	5.4	93.6	5.4	-7.2	-5.4	-3.6	-3.6	0	3.6	6	-14.4	-9	-3.6	-5.4	0	5.4
		DZX 75mg	106.2	3.6	99	1.8	102.6	5.4	102.6	7.2	-9	-7.2	-5.4	-3.6	0	3.6	7	-7.2	0	7.2	-5.4	0	5.4
		DZX 100mg	106.2	3.6	100.8	3.6	102.6	5.4	104.4	7.2	-9	-5.4	-1.8	-3.6	0	3.6	8	-5.4	1.8	9	-5.4	0	5.4
6	Matsuda et al 2002	Week 0	84.507	12.6761	143.662	9.85915	126.761	15.493	304.225	22.5352	49.2958	59.1549	69.0141	-12.6761	0	12.6761	9	154.93	177.465	200	-15.493	0	15.493
		Week 2	82.312	10.6306	173.102	28.6334	134.06	30.531	430.803	54.6638	62.1565	90.7899	119.423	-10.6306	0	10.6306	10	242.079	296.743	351.407	-30.531	0	30.531
		Week 6	88.5033	14.3167	173.102	28.6334	134.056	27.3319	430.803	54.6638	55.9653	84.5987	113.232	-14.3167	0	14.3167	11	242.082	296.746	351.41	-27.3319	0	27.3319
		Week 8	104.348	14.3478	190.848	39.2101	148.696	14.3478	414.37	53.5995	47.2901	86.5002	125.71	-14.3478	0	14.3478	12	212.075	265.675	319.274	-14.3478	0	14.3478
7	Leahy et al 1994	Px rats treated with DZX	122.545	10.0446	126.562	7.03125	240.067	33.1473	132.589	12.0536	-3.01339	4.01786	11.0491	-10.0446	0	10.0446	13	-119.531	-107.478	-95.4241	-33.1473	0	33.1473
8	Wigand and Blackard 1979	DZX treatment	84.1491	3.06128	96.3924	4.59553	94.3606	4.59373	106.092	4.59192	7.64778	12.2433	16.8388	-3.06128	0	3.06128	14	7.13937	11.7313	16.3232	-4.59373	0	4.59373

## Sheet: fasting
0 minutes/fasting							0 minutes
Placebo/Before treatment			DZX				DZX-Control			Control
mean	SEM	95% CI	mean	SEM	95% CI		(DZX-Con)-95%CI Con	(DZX-Con)	(DZX-Con)+95%CI Con	-95% CI Con	Control	+95% CI Con
79.1899	0.354913	0.695629	79.1899	3.55597	6.9697	1	-6.9697	0	6.9697	-0.695629	0	0.695629
72.8926	1.80398	3.53581	90	3.3007	6.46936	2	10.6381	17.1074	23.5768	-3.53581	0	3.53581
76.7951	1.45999	2.86159	100.865	4.12517	8.08533	3	15.9849	24.0702	32.1556	-2.86159	0	2.86159
92.6225	2.24784	4.40576	99.1931	3.2853	6.43919	4	0.131412	6.57061	13.0098	-4.40576	0	4.40576
99.5172	3.31034	6.48828	113.172	4.96552	9.73241	5	3.92276	13.6552	23.3876	-6.48828	0	6.48828
106.2	3.6	7.056	100.8	1.8	3.528	6	-8.928	-5.4	-1.872	-7.056	0	7.056
106.2	3.6	7.056	99	1.8	3.528	7	-10.728	-7.2	-3.672	-7.056	0	7.056
106.2	3.6	7.056	100.8	3.6	7.056	8	-12.456	-5.4	1.656	-7.056	0	7.056
84.507	12.6761	24.8451	143.662	9.85915	19.3239	9	39.831	59.1549	78.4789	-24.8451	0	24.8451
82.312	10.6306	20.836	173.102	28.6334	56.1215	10	34.6684	90.7899	146.911	-20.836	0	20.836
88.5033	14.3167	28.0607	173.102	28.6334	56.1215	11	28.4772	84.5987	140.72	-28.0607	0	28.0607
104.348	14.3478	28.1217	190.848	39.2101	76.8519	12	9.64832	86.5002	163.352	-28.1217	0	28.1217
122.545	10.0446	19.6875	126.562	7.03125	13.7812	13	-9.76339	4.01786	17.7991	-19.6875	0	19.6875
84.1491	3.06128	6.00011	96.3924	4.59553	9.00724	14	3.23607	12.2433	21.2506	-6.00011	0	6.00011
	0 minutes							Fasting
	DZX-Control			Control				Control	DZX
	(DZX-Con)-95%CI Con	(DZX-Con)	(DZX-Con)+95%CI Con	-95% CI Con	Control	+95% CI Con		-0.695629	-6.9697	1	ON
1	-6.9697	0	6.9697	-0.695629	0	0.695629		0	0	1
2	10.6381	17.1074	23.5768	-3.53581	0	3.53581		0.695629	6.9697	1
3	15.9849	24.0702	32.1556	-2.86159	0	2.86159
4	0.131412	6.57061	13.0098	-4.40576	0	4.40576		-3.53581	10.6381	2	ON
5	3.92276	13.6552	23.3876	-6.48828	0	6.48828		0	17.1074	2
6	-8.928	-5.4	-1.872	-7.056	0	7.056		3.53581	23.5768	2
7	-10.728	-7.2	-3.672	-7.056	0	7.056
8	-12.456	-5.4	1.656	-7.056	0	7.056		-2.86159	15.9849	3	ON
9	39.831	59.1549	78.4789	-24.8451	0	24.8451		0	24.0702	3
10	34.6684	90.7899	146.911	-20.836	0	20.836		2.86159	32.1556	3
11	28.4772	84.5987	140.72	-28.0607	0	28.0607
12	9.64832	86.5002	163.352	-28.1217	0	28.1217		-4.40576	0.131412	4	ON
13	-9.76339	4.01786	17.7991	-19.6875	0	19.6875		0	6.57061	4
14	3.23607	12.2433	21.2506	-6.00011	0	6.00011		4.40576	13.0098	4
								-6.48828	3.92276	5	ON
								0	13.6552	5
								6.48828	23.3876	5
								-7.056	-8.928	6	ON
								0	-5.4	6
								7.056	-1.872	6
								-7.056	-10.728	7	ON
								0	-7.2	7
								7.056	-3.672	7
								-7.056	-12.456	8	ON
								0	-5.4	8
								7.056	1.656	8
								-24.8451	39.831	9	12 hours
								0	59.1549	9
								24.8451	78.4789	9
								-20.836	34.6684	10	12 hours
								0	90.7899	10
								20.836	146.911	10
								-28.0607	28.4772	11	12 hours
								0	84.5987	11
								28.0607	140.72	11
								-28.1217	9.64832	12	12 hours
								0	86.5002	12
								28.1217	163.352	12
								-19.6875	-9.76339	13	ON
								0	4.01786	13
								19.6875	17.7991	13
								-6.00011	3.23607	14	ON
								0	12.2433	14
								6.00011	21.2506	14
		0 minutes/fasting
		Placebo/Before treatment			DZX							only means compared
		mean	95% CI	upper bound	lower bound	mean	95% CI	upper bound	lower bound	IRKO > control	IRKO< Control	IRKO >Control	IRKO < Control
	1	79.1899	0.695629	79.8856	78.4943	79.1899	6.9697	86.1596	72.2202	0	0	0	0
	2	72.8926	3.53581	76.4284	69.3568	90	6.46936	96.4694	83.5306	1	0	1	0
	3	76.7951	2.86159	79.6567	73.9335	100.865	8.08533	108.951	92.78	1	0	1	0
	4	92.6225	4.40576	97.0282	88.2167	99.1931	6.43919	105.632	92.7539	0	0	1	0
	5	99.5172	6.48828	106.006	93.029	113.172	9.73241	122.905	103.44	0	0	1	0
	6	106.2	7.056	113.256	99.144	100.8	3.528	104.328	97.272	0	0	0	1
	7	106.2	7.056	113.256	99.144	99	3.528	102.528	95.472	0	0	0	1
	8	106.2	7.056	113.256	99.144	100.8	7.056	107.856	93.744	0	0	0	1
	9	84.507	24.8451	109.352	59.662	143.662	19.3239	162.986	124.338	1	0	1	0
	10	82.312	20.836	103.148	61.476	173.102	56.1215	229.223	116.98	1	0	1	0
	11	88.5033	28.0607	116.564	60.4425	173.102	56.1215	229.223	116.98	1	0	1	0
	12	104.348	28.1217	132.47	76.2261	190.848	76.8519	267.7	113.996	0	0	1	0
	13	122.545	19.6875	142.232	102.857	126.562	13.7812	140.344	112.781	0	0	1	0
	14	84.1491	6.00011	90.1492	78.149	96.3924	9.00724	105.4	87.3851	0	0	1	0
										5	0	10	3

## Sheet: 15 graphs
	Reference	Treatment/condition	0 minutes/fasting				15 minutes/fed				0 minutes							15 minutes									0 minutes			15 minutes
			Placebo/Before treatment		DZX		Placebo/Before treatment		DZX		DZX-Control			Control				DZX-Control			Control						Control	DZX		Control	DZX
			mean	SEM	mean	SEM	mean	SEM	mean	SEM	(DZX-Con)-SEM Con	(DZX-Con)	(DZX-Con)+SEM Con	-SEM Con	Control	+SEM Con		(DZX-Con)-SEM Con	(DZX-Con)	(DZX-Con)+SEM Con	-SEM Con	Control	+SEM Con				-3.31034	8.68966	1	-1.65517	-0.413793	1
	van Boekel et al 2008	DZX treatment	99.5172	3.31034	113.172	4.96552	126.828	1.65517	133.448	7.03448	8.68966	13.6552	18.6207	-3.31034	0	3.31034	1	-0.413793	6.62069	13.6552	-1.65517	0	1.65517				0	13.6552	1	0	6.62069	1
	Due et al 2007	0 weeks	111.328		109.421		127.664		129.567																		3.31034	18.6207	1	1.65517	13.6552	1
		8 weeks	106.571		114.187		123.858		134.325
	Schreuder et al 2005	DZX 50mg	94.8261		96.3521		96.6414		103.658																		-12.6761	49.2958	2	-23.9437	191.549	2
		DZX 75mg	94.8261		100.013		96.6414		102.744																		0	59.1549	2	0	202.817	2
		DZX 100mg	94.8261		99.403		96.6414		104.574																		12.6761	69.0141	2	23.9437	214.085	2
	Matsuda et al 2002	Week 0	84.507	12.6761	143.662	9.85915	188.732	23.9437	391.549	11.2676	49.2958	59.1549	69.0141	-12.6761	0	12.6761	2	191.549	202.817	214.085	-23.9437	0	23.9437
		Week 2	82.312	10.6306	173.102	28.6334	215.195	30.5254	330.586	49.4577	62.1565	90.7899	119.423	-10.6306	0	10.6306	3	65.9331	115.391	164.849	-30.5254	0	30.5254				-10.6306	62.1565	3	-30.5254	65.9331	3
		Week 6	88.5033	14.3167	173.102	28.6334	252.495	40.3471	330.586	49.4577	55.9653	84.5987	113.232	-14.3167	0	14.3167	4	28.6334	78.0911	127.549	-40.3471	0	40.3471				0	90.7899	3	0	115.391	3
		Week 8	104.348	14.3478	190.848	39.2101	181.304	45.6522	409.308	75.8163	47.2901	86.5002	125.71	-14.3478	0	14.3478	5	152.188	228.004	303.82	-45.6522	0	45.6522				10.6306	119.423	3	30.5254	164.849	3
	Alemzadeh and Tushaus 2004	ZDF	124.615	15.8824	86.7421	10.9955	310.317	15.8824	215.023	9.77376	-48.8688	-37.8733	-26.8778	-15.8824	0	15.8824	6	-105.068	-95.2941	-85.5204	-15.8824	0	15.8824
		ZL	80.9337	9.28747	83.5872	9.28747	175.135	15.9214	195.037	35.8231	-6.63391	2.65356	11.941	-9.28747	0	9.28747	7	-15.9214	19.9017	55.7248	-15.9214	0	15.9214				-14.3167	55.9653	4	-40.3471	28.6334	4
																											0	84.5987	4	0	78.0911	4
																											14.3167	113.232	4	40.3471	127.549	4
																											-14.3478	47.2901	5	-45.6522	152.188	5
	15 minutes							15 minutes																			0	86.5002	5	0	228.004	5
	Placebo/After treatment			DZX				DZX-Control			Control																14.3478	125.71	5	45.6522	303.82	5
	mean	SEM	95% CI	mean	SEM	95% CI		(DZX-Con)-95% CI DZX	(DZX-Con)	(DZX-Con)+95%CI DZX	-95%CI Con	Control to 0	+95%CI Con
	126.828	1.65517	3.24414	133.448	7.03448	13.7876	1	-7.1669	6.62069	20.4083	-3.24414	0	3.24414														-15.8824	-48.8688	6	-15.8824	-105.068	6
	188.732	23.9437	46.9296	391.549	11.2676	22.0845	2	180.732	202.817	224.901	-46.9296	0	46.9296														0	-37.8733	6	0	-95.2941	6
	215.195	30.5254	59.8298	330.586	49.4577	96.9371	3	18.4538	115.391	212.328	-59.8298	0	59.8298														15.8824	-26.8778	6	15.8824	-85.5204	6
	252.495	40.3471	79.0803	330.586	49.4577	96.9371	4	-18.846	78.0911	175.028	-79.0803	0	79.0803
	181.304	45.6522	89.4783	409.308	75.8163	148.6	5	79.4039	228.004	376.604	-89.4783	0	89.4783														-9.28747	-6.63391	7	-15.9214	-15.9214	7
	310.317	15.8824	31.1294	215.023	9.77376	19.1566	6	-114.451	-95.2941	-76.1376	-31.1294	0	31.1294														0	2.65356	7	0	19.9017	7
	175.135	15.9214	31.2059	195.037	35.8231	70.2133	7	-50.3115	19.9017	90.115	-31.2059	0	31.2059														9.28747	11.941	7	15.9214	55.7248	7
									15 minutes
									Control	DZX
	1	-7.1669	6.62069	20.4083	-3.24414	0	3.24414		-3.24414	-7.1669	1
	2	180.732	202.817	224.901	-46.9296	0	46.9296		0	6.62069	1
	3	18.4538	115.391	212.328	-59.8298	0	59.8298		3.24414	20.4083	1
	4	-18.846	78.0911	175.028	-79.0803	0	79.0803
	5	79.4039	228.004	376.604	-89.4783	0	89.4783		-46.9296	180.732	2
	6	-114.451	-95.2941	-76.1376	-31.1294	0	31.1294		0	202.817	2
	7	-50.3115	19.9017	90.115	-31.2059	0	31.2059		46.9296	224.901	2
									-59.8298	18.4538	3
									0	115.391	3
									59.8298	212.328	3
									-79.0803	-18.846	4
									0	78.0911	4
									79.0803	175.028	4
									-89.4783	79.4039	5
									0	228.004	5
									89.4783	376.604	5
									-31.1294	-114.451	6
									0	-95.2941	6
									31.1294	-76.1376	6
									-31.2059	-50.3115	7
									0	19.9017	7
									31.2059	90.115	7
		15 minutes
		Placebo/After treatment										only means compared
		mean	95% CI	upper bound	lower bound	mean	95% CI	upper bound	lower bound	IRKO > control	IRKO< Control	IRKO >Control	IRKO < Control
	1	126.828	3.24414	130.072	123.583	133.448	13.7876	147.236	119.661	0	0	1	0
	2	188.732	46.9296	235.662	141.803	391.549	22.0845	413.634	369.465	1	0	1	0
	3	215.195	59.8298	275.025	155.365	330.586	96.9371	427.523	233.649	0	0	1	0
	4	252.495	79.0803	331.575	173.414	330.586	96.9371	427.523	233.649	0	0	1	0
	5	181.304	89.4783	270.783	91.8261	409.308	148.6	557.908	260.708	0	0	1	0
	6	310.317	31.1294	341.446	279.187	215.023	19.1566	234.179	195.866	0	1	0	1
	7	175.135	31.2059	206.341	143.929	195.037	70.2133	265.25	124.824	0	0	1	0
										1	1	6	1

## Sheet: 30 graphs
	Reference	Treatment/condition	0 minutes/fasting				30 minutes/fed				0 minutes							30 minutes
			Placebo/Before treatment		DZX		Placebo/Before treatment		DZX		DZX-Control			Control				DZX-Control			Control				0 minutes			30 minutes
			mean	SEM	mean	SEM	mean	SEM	mean	SEM	(DZX-Con)-SEM Con	(DZX-Con)	(DZX-Con)+SEM Con	-SEM Con	Control	+SEM Con		(DZX-Con)-SEM Con	(DZX-Con)	(DZX-Con)+SEM Con	-SEM Con	Control	+SEM Con		Control	DZX		Control	DZX
	Brauner et al 2016	before diet	79.1899	0.35	79.1899	3.56	126.704	1.64147	132.737	6.90276	-3.56	0	3.56	-0.35	0	0.35	1	-0.869244	6.03352	12.9363	-1.64147	0	1.64147		-0.35	-3.56	1	-1.64147	-0.869244	1
		5 days after treatment	72.8926	1.80398	90	3.3007	125.702	5.23155	141.322	5.77622	13.8067	17.1074	20.4081	-1.80398	0	1.80398	2	9.84362	15.6198	21.3961	-5.23155	0	5.23155		0	0	1	0	6.03352	1
		2 months after treatment	76.7951	1.45999	100.865	4.12517	129.695	6.01961	171.058	8.03239	19.9451	24.0702	28.1954	-1.45999	0	1.45999	3	33.3305	41.3629	49.3953	-6.01961	0	6.01961		0.35	3.56	1	1.64147	12.9363	1
	Ramanathan et al 2011	DZX treatment	92.6225	2.24784	99.1931	3.2853	123.055	3.80403	130.231	4.58213	3.2853	6.57061	9.85591	-2.24784	0	2.24784	4	2.59366	7.17579	11.7579	-3.80403	0	3.80403
	Due et al 2007	0 weeks	111.328		109.421		162.076		162.08																-1.80398	13.8067	2	-5.23155	9.84362	2
		8 weeks	106.571		114.187		155.415		170.644																0	17.1074	2	0	15.6198	2
	Schreuder et al 2005	DZX 50mg	94.8261		96.3521		130.796		134.763																1.80398	20.4081	2	5.23155	21.3961	2
		DZX 75mg	94.8261		100.013		130.796		137.813
		DZX 100mg	94.8261		99.403		130.796		135.983																-1.45999	19.9451	3	-6.01961	33.3305	3
	Alemzadeh and Tushaus 2004	ZDF	124.615	15.8824	86.7421	10.9955	465.475	19.5475	235.792	17.1041	-48.8688	-37.8733	-26.8778	-15.8824	0	15.8824	5	-246.787	-229.683	-212.579	-19.5475	0	19.5475		0	24.0702	3	0	41.3629	3
		ZL	80.9337	9.28747	83.5872	9.28747	159.214	11.941	165.848	39.8034	-6.63391	2.65356	11.941	-9.28747	0	9.28747	6	-33.1695	6.63391	46.4373	-11.941	0	11.941		1.45999	28.1954	3	6.01961	49.3953	3
	Matsuda et al 2002	Week 0	84.507	12.6761	143.662	9.85915	188.732	25.3521	383.099	16.9014	49.2958	59.1549	69.0141	-12.6761	0	12.6761	7	177.465	194.366	211.268	-25.3521	0	25.3521
		Week 2	82.312	10.6306	173.102	28.6334	245.888	29.1924	389.154	57.2668	62.1565	90.7899	119.423	-10.6306	0	10.6306	8	85.9996	143.266	200.533	-29.1924	0	29.1924		-2.24784	3.2853	4	-3.80403	2.59366	4
		Week 6	88.5033	14.3167	173.102	28.6334	239.479	35.141	389.154	57.2668	55.9653	84.5987	113.232	-14.3167	0	14.3167	9	92.4078	149.675	206.941	-35.141	0	35.141		0	6.57061	4	0	7.17579	4
		Week 8	104.348	14.3478	190.848	39.2101	217.826	19.5652	410.787	86.2686	47.2901	86.5002	125.71	-14.3478	0	14.3478	10	106.693	192.961	279.23	-19.5652	0	19.5652		2.24784	9.85591	4	3.80403	11.7579	4
	Leahy et al 1994	Px rats treated with DZX	122.545	10.0446	126.562	7.03125	316.406	24.1071	287.277	21.0938	-3.01339	4.01786	11.0491	-10.0446	0	10.0446	11	-50.2232	-29.1295	-8.03571	-24.1071	0	24.1071
	Wigand and Blackard 1979	DZX treatment	84.1491	3.06128	96.3924	4.59553	142.657	9.18203	145.209	6.63277	7.64778	12.2433	16.8388	-3.06128	0	3.06128	12	-4.08171	2.55107	9.18384	-9.18203	0	9.18203		-15.8824	-48.8688	5	-19.5475	-246.787	5
																									0	-37.8733	5	0	-229.683	5
																									15.8824	-26.8778	5	19.5475	-212.579	5
	30 minutes/fed							30 minutes																	-9.28747	-6.63391	6	-11.941	-33.1695	6
	Placebo/Before treatment			DZX				DZX-Control			Control														0	2.65356	6	0	6.63391	6
	mean	SEM	95% CI	mean	SEM	95% CI		(DZX-Con)-95% CI DZX	(DZX-Con)	(DZX-Con)+95% CI DZX	-95% CI Con	Control	+95% CI Con												9.28747	11.941	6	11.941	46.4373	6
	126.704	1.64147	3.21729	132.737	6.90276	13.5294	1	-7.4959	6.03352	19.5629	-3.21729	0	3.21729
	125.702	5.23155	10.2538	141.322	5.77622	11.3214	2	4.29845	15.6198	26.9412	-10.2538	0	10.2538												-12.6761	49.2958	7	-25.3521	177.465	7
	129.695	6.01961	11.7984	171.058	8.03239	15.7435	3	25.6194	41.3629	57.1064	-11.7984	0	11.7984												0	59.1549	7	0	194.366	7
	123.055	3.80403	7.45591	130.231	4.58213	8.98098	4	-1.80519	7.17579	16.1568	-7.45591	0	7.45591												12.6761	69.0141	7	25.3521	211.268	7
	465.475	19.5475	38.3131	235.792	17.1041	33.524	5	-263.207	-229.683	-196.159	-38.3131	0	38.3131
	159.214	11.941	23.4044	165.848	39.8034	78.0147	6	-71.3808	6.63391	84.6486	-23.4044	0	23.4044												-10.6306	62.1565	8	-29.1924	85.9996	8
	188.732	25.3521	49.6901	383.099	16.9014	33.1268	7	161.239	194.366	227.493	-49.6901	0	49.6901												0	90.7899	8	0	143.266	8
	245.888	29.1924	57.2171	389.154	57.2668	112.243	8	31.0235	143.266	255.509	-57.2171	0	57.2171												10.6306	119.423	8	29.1924	200.533	8
	239.479	35.141	68.8764	389.154	57.2668	112.243	9	37.4317	149.675	261.918	-68.8764	0	68.8764
	217.826	19.5652	38.3478	410.787	86.2686	169.086	10	23.8748	192.961	362.048	-38.3478	0	38.3478												-14.3167	55.9653	9	-35.141	92.4078	9
	316.406	24.1071	47.25	287.277	21.0938	41.3438	11	-70.4732	-29.1295	12.2143	-47.25	0	47.25												0	84.5987	9	0	149.675	9
	142.657	9.18203	17.9968	145.209	6.63277	13.0002	12	-10.4492	2.55107	15.5513	-17.9968	0	17.9968												14.3167	113.232	9	35.141	206.941	9
																									-14.3478	47.2901	10	-19.5652	106.693	10
									30 minutes																0	86.5002	10	0	192.961	10
		(DZX-Con)-95% CI DZX	(DZX-Con)	(DZX-Con)+95% CI DZX	-95% CI Con	Control	+95% CI Con		Control	DZX															14.3478	125.71	10	19.5652	279.23	10
	1	-7.4959	6.03352	19.5629	-3.21729	0	3.21729		-3.21729	-7.4959	1
	2	4.29845	15.6198	26.9412	-10.2538	0	10.2538		0	6.03352	1														-10.0446	-3.01339	11	-24.1071	-50.2232	11
	3	25.6194	41.3629	57.1064	-11.7984	0	11.7984		3.21729	19.5629	1														0	4.01786	11	0	-29.1295	11
	4	-1.80519	7.17579	16.1568	-7.45591	0	7.45591																		10.0446	11.0491	11	24.1071	-8.03571	11
	5	-263.207	-229.683	-196.159	-38.3131	0	38.3131		-10.2538	4.29845	2
	6	-71.3808	6.63391	84.6486	-23.4044	0	23.4044		0	15.6198	2														-3.06128	7.64778	12	-9.18203	-4.08171	12
	7	161.239	194.366	227.493	-49.6901	0	49.6901		10.2538	26.9412	2														0	12.2433	12	0	2.55107	12
	8	31.0235	143.266	255.509	-57.2171	0	57.2171																		3.06128	16.8388	12	9.18203	9.18384	12
	9	37.4317	149.675	261.918	-68.8764	0	68.8764		-11.7984	25.6194	3
	10	23.8748	192.961	362.048	-38.3478	0	38.3478		0	41.3629	3
	11	-70.4732	-29.1295	12.2143	-47.25	0	47.25		11.7984	57.1064	3
	12	-10.4492	2.55107	15.5513	-17.9968	0	17.9968
									-7.45591	-1.80519	4
									0	7.17579	4
									7.45591	16.1568	4
									-38.3131	-263.207	5
									0	-229.683	5
									38.3131	-196.159	5
									-23.4044	-71.3808	6
									0	6.63391	6
									23.4044	84.6486	6
									-49.6901	161.239	7
									0	194.366	7
									49.6901	227.493	7
									-57.2171	31.0235	8
									0	143.266	8
									57.2171	255.509	8
									-68.8764	37.4317	9
									0	149.675	9
									68.8764	261.918	9
									-38.3478	23.8748	10
									0	192.961	10
									38.3478	362.048	10
									-47.25	-70.4732	11
									0	-29.1295	11
									47.25	12.2143	11
									-17.9968	-10.4492	12
									0	2.55107	12
									17.9968	15.5513	12
	30 minutes/fed
	Placebo/Before treatment				DZX						only means compared
	mean	95% CI	upper bound	lower bound	mean	95% CI	upper bound	lower bound	IRKO > control	IRKO< Control	IRKO >Control	IRKO < Control
1	126.704	3.21729	129.921	123.487	132.737	13.5294	146.267	119.208	0	0	1	0
2	125.702	10.2538	135.956	115.449	141.322	11.3214	152.644	130.001	0	0	1	0
3	129.695	11.7984	141.494	117.897	171.058	15.7435	186.801	155.315	1	0	1	0
4	123.055	7.45591	130.511	115.599	130.231	8.98098	139.212	121.25	0	0	1	0
5	465.475	38.3131	503.788	427.162	235.792	33.524	269.316	202.268	0	1	0	1
6	159.214	23.4044	182.618	135.809	165.848	78.0147	243.862	87.8329	0	0	1	0
7	188.732	49.6901	238.423	139.042	383.099	33.1268	416.225	349.972	1	0	1	0
8	245.888	57.2171	303.105	188.67	389.154	112.243	501.397	276.911	0	0	1	0
9	239.479	68.8764	308.356	170.603	389.154	112.243	501.397	276.911	0	0	1	0
10	217.826	38.3478	256.174	179.478	410.787	169.086	579.874	241.701	0	0	1	0
11	316.406	47.25	363.656	269.156	287.277	41.3438	328.621	245.933	0	0	0	1
12	142.657	17.9968	160.654	124.661	145.209	13.0002	158.209	132.208	0	0	1	0
									2	1	10	2

## Sheet: 60 graphs 
	Reference	Treatment/condition	0 minutes/fasting				60 minutes/fed				0 minutes							60 minutes
			Placebo/Before treatment		DZX		Placebo/Before treatment		DZX		DZX-Control			Control				DZX-Control			Control					0 minutes		60 minutes
			mean	SEM	mean	SEM	mean	SEM	mean	SEM	(DZX-Con)-SEM Con	(DZX-Con)	(DZX-Con)+SEM Con	-SEM Con	Control	+SEM Con		(DZX-Con)-SEM Con	(DZX-Con)	(DZX-Con)+SEM Con	-SEM Con	Control	+SEM Con			Control	DZX	Control	DZX
	Brauner et al 2016	before diet	79.1899	0.354913	79.1899	3.55597	114.637	8.78534	127.458	2.21821	-3.55597	0	3.55597	-0.354913	0	0.354913	1	10.603	12.8212	15.0394	-8.78534	0	8.78534		1	-0.354913	-3.55597	-8.78534	10.603
		5 days after treatment	72.8926	1.80398	90	3.3007	146.529	9.4895	123.471	6.67474	13.8067	17.1074	20.4081	-1.80398	0	1.80398	2	-29.7326	-23.0579	-16.3831	-9.4895	0	9.4895		1	0	0	0	12.8212
		2 months after treatment	76.7951	1.45999	100.865	4.12517	185.601	14.7621	123.17	6.74995	19.9451	24.0702	28.1954	-1.45999	0	1.45999	3	-69.1804	-62.4305	-55.6805	-14.7621	0	14.7621		1	0.354913	3.55597	8.78534	15.0394
	Ramanathan et al 2011	DZX treatment	92.6225	2.24784	99.1931	3.2853	118.386	6.05187	127.896	7.60807	3.2853	6.57061	9.85591	-2.24784	0	2.24784	4	1.90202	9.51009	17.1182	-6.05187	0	6.05187
	van Boekel et al 2008	DZX treatment	99.5172	3.31034	113.172	4.96552	142.552	7.03448	164.069	9.10345	8.68966	13.6552	18.6207	-3.31034	0	3.31034	5	12.4138	21.5172	30.6207	-7.03448	0	7.03448		2	-1.80398	13.8067	-9.4895	-29.7326
	Due et al 2007	0 weeks	111.328		109.421		188.082		194.747																2	0	17.1074	0	-23.0579
		8 weeks	106.571		114.187		173.813		205.214																2	1.80398	20.4081	9.4895	-16.3831
	Matsuda et al 2002	Week 0	84.507	12.6761	143.662	9.85915	185.915	21.1268	385.915	19.7183	49.2958	59.1549	69.0141	-12.6761	0	12.6761	6	180.282	200	219.718	-21.1268	0	21.1268
		Week 2	82.312	10.6306	173.102	28.6334	206.416	30.5366	385.249	49.4577	62.1565	90.7899	119.423	-10.6306	0	10.6306	7	129.376	178.834	228.291	-30.5366	0	30.5366		3	-1.45999	19.9451	-14.7621	-69.1804
		Week 6	88.5033	14.3167	173.102	28.6334	187.419	28.6334	385.249	49.4577	55.9653	84.5987	113.232	-14.3167	0	14.3167	8	148.373	197.831	247.289	-28.6334	0	28.6334		3	0	24.0702	0	-62.4305
		Week 8	104.348	14.3478	190.848	39.2101	199.565	15.6522	438.561	45.7564	47.2901	86.5002	125.71	-14.3478	0	14.3478	9	193.239	238.996	284.752	-15.6522	0	15.6522		3	1.45999	28.1954	14.7621	-55.6805
	Leahy et al 1994	Px rats treated with DZX	122.545	10.0446	126.562	7.03125	330.469	38.1696	247.098	42.1875	-3.01339	4.01786	11.0491	-10.0446	0	10.0446	10	-125.558	-83.3705	-41.183	-38.1696	0	38.1696
	Alemzadeh and Tushaus 2004	ZDF	124.615	15.8824	86.7421	10.9955	368.959	15.8824	171.041	12.2172	-48.8688	-37.8733	-26.8778	-15.8824	0	15.8824	11	-210.136	-197.919	-185.701	-15.8824	0	15.8824		4	-2.24784	3.2853	-6.05187	1.90202
		ZL	80.9337	9.28747	83.5872	9.28747	123.391	15.9214	124.717	10.6143	-6.63391	2.65356	11.941	-9.28747	0	9.28747	12	-9.28747	1.32678	11.941	-15.9214	0	15.9214		4	0	6.57061	0	9.51009
	Wigand and Blackard 1979	DZX treatment	84.1491	3.06128	96.3924	4.59553	139.426	10.2025	164.425	10.7163	7.64778	12.2433	16.8388	-3.06128	0	3.06128	13	14.2824	24.9986	35.7149	-10.2025	0	10.2025		4	2.24784	9.85591	6.05187	17.1182
																									5	-3.31034	8.68966	-7.03448	12.4138
																									5	0	13.6552	0	21.5172
																									5	3.31034	18.6207	7.03448	30.6207
	60 minutes/fed
	Placebo/After treatment			DZX																					6	-12.6761	49.2958	-21.1268	180.282
	mean	SEM	95% CI	mean	SEM	95% CI		(DZX-Con)-95% CI DZX	(DZX-Con)	(DZX-Con)+95% CI DZX	-95% CI Con	Control	+95% CI Con												6	0	59.1549	0	200
	114.637	8.78534	17.2193	127.458	2.21821	4.34768		8.47355	12.8212	17.1689	-17.2193	0	17.2193												6	12.6761	69.0141	21.1268	219.718
	146.529	9.4895	18.5994	123.471	6.67474	13.0825		-36.1403	-23.0579	-9.97536	-18.5994	0	18.5994
	185.601	14.7621	28.9337	123.17	6.74995	13.2299		-75.6604	-62.4305	-49.2006	-28.9337	0	28.9337												7	-10.6306	62.1565	-30.5366	129.376
	118.386	6.05187	11.8617	127.896	7.60807	14.9118		-5.40173	9.51009	24.4219	-11.8617	0	11.8617												7	0	90.7899	0	178.834
	142.552	7.03448	13.7876	164.069	9.10345	17.8428		3.67448	21.5172	39.36	-13.7876	0	13.7876												7	10.6306	119.423	30.5366	228.291
	185.915	21.1268	41.4085	385.915	19.7183	38.6479		161.352	200	238.648	-41.4085	0	41.4085
	206.416	30.5366	59.8516	385.249	49.4577	96.9371		81.8964	178.834	275.771	-59.8516	0	59.8516												8	-14.3167	55.9653	-28.6334	148.373
	187.419	28.6334	56.1215	385.249	49.4577	96.9371		100.894	197.831	294.768	-56.1215	0	56.1215												8	0	84.5987	0	197.831
	199.565	15.6522	30.6783	438.561	45.7564	89.6826		149.313	238.996	328.678	-30.6783	0	30.6783												8	14.3167	113.232	28.6334	247.289
	330.469	38.1696	74.8125	247.098	42.1875	82.6875		-166.058	-83.3705	-0.683036	-74.8125	0	74.8125
	368.959	15.8824	31.1294	171.041	12.2172	23.9457		-221.864	-197.919	-173.973	-31.1294	0	31.1294												9	-14.3478	47.2901	-15.6522	193.239
	123.391	15.9214	31.2059	124.717	10.6143	20.8039		-19.4771	1.32678	22.1307	-31.2059	0	31.2059												9	0	86.5002	0	238.996
	139.426	10.2025	19.9968	164.425	10.7163	21.0039		3.99473	24.9986	46.0026	-19.9968	0	19.9968												9	14.3478	125.71	15.6522	284.752
																									10	-10.0446	-3.01339	-38.1696	-125.558
								60 minutes																	10	0	4.01786	0	-83.3705
	(DZX-Con)-95% CI DZX	(DZX-Con)	(DZX-Con)+95% CI DZX	-95% CI Con	Control	+95% CI Con		Control	DZX																10	10.0446	11.0491	38.1696	-41.183
1	8.47355	12.8212	17.1689	-17.2193	0	17.2193		-17.2193	8.47355	1
2	-36.1403	-23.0579	-9.97536	-18.5994	0	18.5994		0	12.8212	1															11	-15.8824	-48.8688	-15.8824	-210.136
3	-75.6604	-62.4305	-49.2006	-28.9337	0	28.9337		17.2193	17.1689	1															11	0	-37.8733	0	-197.919
4	-5.40173	9.51009	24.4219	-11.8617	0	11.8617																			11	15.8824	-26.8778	15.8824	-185.701
5	3.67448	21.5172	39.36	-13.7876	0	13.7876		-18.5994	-36.1403	2
6	161.352	200	238.648	-41.4085	0	41.4085		0	-23.0579	2															12	-9.28747	-6.63391	-15.9214	-9.28747
7	81.8964	178.834	275.771	-59.8516	0	59.8516		18.5994	-9.97536	2															12	0	2.65356	0	1.32678
8	100.894	197.831	294.768	-56.1215	0	56.1215																			12	9.28747	11.941	15.9214	11.941
9	149.313	238.996	328.678	-30.6783	0	30.6783		-28.9337	-75.6604	3
10	-166.058	-83.3705	-0.683036	-74.8125	0	74.8125		0	-62.4305	3															13	-3.06128	7.64778	-10.2025	14.2824
11	-221.864	-197.919	-173.973	-31.1294	0	31.1294		28.9337	-49.2006	3															13	0	12.2433	0	24.9986
12	-19.4771	1.32678	22.1307	-31.2059	0	31.2059																			13	3.06128	16.8388	10.2025	35.7149
13	3.99473	24.9986	46.0026	-19.9968	0	19.9968		-11.8617	-5.40173	4
								0	9.51009	4
								11.8617	24.4219	4
								-13.7876	3.67448	5
								0	21.5172	5
								13.7876	39.36	5
								-41.4085	161.352	6
								0	200	6
								41.4085	238.648	6
								-59.8516	81.8964	7
								0	178.834	7
								59.8516	275.771	7
								-56.1215	100.894	8
								0	197.831	8
								56.1215	294.768	8
								-30.6783	149.313	9
								0	238.996	9
								30.6783	328.678	9
								-74.8125	-166.058	10
								0	-83.3705	10
								74.8125	-0.683036	10
								-31.1294	-221.864	11
								0	-197.919	11
								31.1294	-173.973	11
								-31.2059	-19.4771	12
								0	1.32678	12
								31.2059	22.1307	12
								-19.9968	3.99473	13
								0	24.9986	13
								19.9968	46.0026	13
	60 minutes/fed
	Placebo/After treatment				DZX						only means compared
	mean	95% CI	upper bound	lower bound	mean	95% CI	upper bound	lower bound	IRKO > control	IRKO< Control	IRKO >Control	IRKO < Control
1	114.637	17.2193	131.856	97.4176	127.458	4.34768	131.806	123.11	0	0	1	0
2	146.529	18.5994	165.128	127.93	123.471	13.0825	136.554	110.389	0	0	0	1
3	185.601	28.9337	214.534	156.667	123.17	13.2299	136.4	109.94	0	1	0	1
4	118.386	11.8617	130.248	106.524	127.896	14.9118	142.808	112.984	0	0	1	0
5	142.552	13.7876	156.339	128.764	164.069	17.8428	181.912	146.226	0	0	1	0
6	185.915	41.4085	227.324	144.507	385.915	38.6479	424.563	347.268	1	0	1	0
7	206.416	59.8516	266.268	146.564	385.249	96.9371	482.187	288.312	1	0	1	0
8	187.419	56.1215	243.54	131.297	385.249	96.9371	482.187	288.312	1	0	1	0
9	199.565	30.6783	230.243	168.887	438.561	89.6826	528.244	348.878	1	0	1	0
10	330.469	74.8125	405.281	255.656	247.098	82.6875	329.786	164.411	0	0	0	1
11	368.959	31.1294	400.089	337.83	171.041	23.9457	194.986	147.095	0	1	0	1
12	123.391	31.2059	154.597	92.1848	124.717	20.8039	145.521	103.914	0	0	1	0
13	139.426	19.9968	159.423	119.43	164.425	21.0039	185.429	143.421	0	0	1	0
									4	2	9	4

## Sheet: 90 graphs
	Reference	Treatment/condition	0 minutes/fasting				90 minutes/fed				0 minutes							90 minutes
			Placebo/Before treatment		DZX		Placebo/Before treatment		DZX		DZX-Control			Control				DZX-Control			Control					0 minutes		90 minutes
			mean	SEM	mean	SEM	mean	SEM	mean	SEM	(DZX-Con)-SEM Con	(DZX-Con)	(DZX-Con)+SEM Con	-SEM Con	Control	+SEM Con		(DZX-Con)-SEM Con	(DZX-Con)	(DZX-Con)+SEM Con	-SEM Con	Control	+SEM Con			Control	DZX	Control	DZX
	Ramanathan et al 2011	DZX treatment	92.6225	2.24784	99.1931	3.2853	109.741	4.66859	130.836	7.86744	3.2853	6.57061	9.85591	-2.24784	0	2.24784	1	13.2277	21.0951	28.9625	-4.66859	0	4.66859		1	-2.24784	3.2853	-4.66859	13.2277
	van Boekel et al 2008	DZX treatment	99.5172	3.31034	113.172	4.96552	114.828	8.27586	162.414	12	8.68966	13.6552	18.6207	-3.31034	0	3.31034	2	35.5862	47.5862	59.5862	-8.27586	0	8.27586		1	0	6.57061	0	21.0951
	Wigand and Blackard 1979	DZX treatment	84.1491	3.06128	96.3924	4.59553	118.848	7.14299	173.441	7.65139	7.64778	12.2433	16.8388	-3.06128	0	3.06128	3	46.9414	54.5928	62.2442	-7.14299	0	7.14299		1	2.24784	9.85591	4.66859	28.9625
																									2	-3.31034	8.68966	-8.27586	35.5862
																									2	0	13.6552	0	47.5862
	90 minutes/fed																								2	3.31034	18.6207	8.27586	59.5862
	Placebo/Before treatment			DZX
	mean	SEM	95% CI	mean	SEM	95% CI		(DZX-Con)-95% CI DZX	(DZX-Con)	(DZX-Con)+95% CI DZX	-95% CI Con	Control	+95% CI Con												3	-3.06128	7.64778	-7.14299	46.9414
	109.741	4.66859	9.15043	130.836	7.86744	15.4202		5.67493	21.0951	36.5153	-9.15043	0	9.15043												3	0	12.2433	0	54.5928
	114.828	8.27586	16.2207	162.414	12	23.52		24.0662	47.5862	71.1062	-16.2207	0	16.2207												3	3.06128	16.8388	7.14299	62.2442
	118.848	7.14299	14.0003	173.441	7.65139	14.9967		39.5961	54.5928	69.5896	-14.0003	0	14.0003
	(DZX-Con)-95% CI DZX	(DZX-Con)	(DZX-Con)+95% CI DZX	-95% CI Con	Control	+95% CI Con		90 minutes
	5.67493	21.0951	36.5153	-9.15043	0	9.15043		Control	DZX
	24.0662	47.5862	71.1062	-16.2207	0	16.2207		-9.15043	5.67493	1
	39.5961	54.5928	69.5896	-14.0003	0	14.0003		0	21.0951	1
								9.15043	36.5153	1
								-16.2207	24.0662	2
								0	47.5862	2
								16.2207	71.1062	2
								-14.0003	39.5961	3
								0	54.5928	3
								14.0003	69.5896	3
	90 minutes/fed
	Placebo/Before treatment				DZX						only means compared
	mean	95% CI	upper bound	lower bound	mean	95% CI	upper bound	lower bound	IRKO > control	IRKO< Control	IRKO >Control	IRKO < Control
	109.741	9.15043	118.891	100.59	130.836	15.4202	146.256	115.416	0	0	1	0
	114.828	16.2207	131.048	98.6069	162.414	23.52	185.934	138.894	1	0	1	0
	118.848	14.0003	132.848	104.848	173.441	14.9967	188.438	158.444	1	0	1	0
									2	0	3	0

## Sheet: 120 graphs
0 minutes							120 minutes														0 minutes				120 minutes
DZX-Control			Control				DZX-Control			Control					0 minutes		120 minutes				Control	DZX			Control	DZX
(DZX-Con)-SEM Con	(DZX-Con)	(DZX-Con)+SEM Con	-SEM Con	Control	+SEM Con		(DZX-Con)-SEM Con	(DZX-Con)	(DZX-Con)+SEM Con	-SEM Con	Control	+SEM Con			Control	DZX	Control	DZX		1	-0.354913	-3.55597	1		-1.7302	-11.0537	1
-3.55597	0	3.55597	-0.354913	0	0.354913	1	-11.0537	-6.03352	-1.01333	-1.7302	0	1.7302		1	-0.354913	-3.55597	-1.7302	-11.0537		1	0	0	1		0	-6.03352	1
13.8067	17.1074	20.4081	-1.80398	0	1.80398	2	-5.23298	4.46281	14.1586	-8.11793	0	8.11793		1	0	0	0	-6.03352		1	0.354913	3.55597	1		1.7302	-1.01333	1
19.9451	24.0702	28.1954	-1.45999	0	1.45999	3	59.0306	75.9655	92.9004	-5.47306	0	5.47306		1	0.354913	3.55597	1.7302	-1.01333
3.2853	6.57061	9.85591	-2.24784	0	2.24784	4	4.49568	10.7205	16.9452	-4.49568	0	4.49568								2	-1.80398	13.8067	2		-8.11793	-5.23298	2
8.68966	13.6552	18.6207	-3.31034	0	3.31034	5	31.8621	48	64.1379	-6.62069	0	6.62069		2	-1.80398	13.8067	-8.11793	-5.23298		2	0	17.1074	2		0	4.46281	2
-1.9072	-1.9072	-1.9072	0	0	0	6	19.0353	19.0353	19.0353	0	0	0		2	0	17.1074	0	4.46281		2	1.80398	20.4081	2		8.11793	14.1586	2
7.61656	7.61656	7.61656	0	0	0	7	48.5377	48.5377	48.5377	0	0	0		2	1.80398	20.4081	8.11793	14.1586
-7.2	-5.4	-3.6	-3.6	0	3.6	8	-14.4	-9	-3.6	-5.4	0	5.4								3	-1.45999	19.9451	3		-5.47306	59.0306	3
-9	-7.2	-5.4	-3.6	0	3.6	9	-7.2	0	7.2	-5.4	0	5.4		3	-1.45999	19.9451	-5.47306	59.0306		3	0	24.0702	3		0	75.9655	3
-9	-5.4	-1.8	-3.6	0	3.6	10	-5.4	1.8	9	-5.4	0	5.4		3	0	24.0702	0	75.9655		3	1.45999	28.1954	3		5.47306	92.9004	3
49.2958	59.1549	69.0141	-12.6761	0	12.6761	11	154.93	177.465	200	-15.493	0	15.493		3	1.45999	28.1954	5.47306	92.9004
62.1565	90.7899	119.423	-10.6306	0	10.6306	12	242.079	296.743	351.407	-30.531	0	30.531								4	-2.24784	3.2853	4		-4.49568	4.49568	4
55.9653	84.5987	113.232	-14.3167	0	14.3167	13	242.082	296.746	351.41	-27.3319	0	27.3319		4	-2.24784	3.2853	-4.49568	4.49568		4	0	6.57061	4		0	10.7205	4
47.2901	86.5002	125.71	-14.3478	0	14.3478	14	212.075	265.675	319.274	-14.3478	0	14.3478		4	0	6.57061	0	10.7205		4	2.24784	9.85591	4		4.49568	16.9452	4
-3.01339	4.01786	11.0491	-10.0446	0	10.0446	15	-119.531	-107.478	-95.4241	-33.1473	0	33.1473		4	2.24784	9.85591	4.49568	16.9452
7.64778	12.2433	16.8388	-3.06128	0	3.06128	16	7.13937	11.7313	16.3232	-4.59373	0	4.59373								5	-3.31034	8.68966	5		-6.62069	31.8621	5
														5	-3.31034	8.68966	-6.62069	31.8621		5	0	13.6552	5		0	48	5
														5	0	13.6552	0	48		5	3.31034	18.6207	5		6.62069	64.1379	5
														5	3.31034	18.6207	6.62069	64.1379
120 minutes/fed																				6	0	-1.9072	6		0	19.0353	6
Placebo/Before treatment			DZX											6	0	-1.9072	0	19.0353		6	0	-1.9072	6		0	19.0353	6
mean	SEM	95% CI	mean	SEM	95% CI		(DZX-Con)-95% CI DZX	(DZX-Con)	(DZX-Con)+95% CI DZX	-95% CI Con	Control	+95% CI Con		6	0	-1.9072	0	19.0353		6	0	-1.9072	6		0	19.0353	6
113.883	1.7302	3.39119	107.849	5.02019	9.83958		-15.8731	-6.03352	3.80606	-3.39119	0	3.39119		6	0	-1.9072	0	19.0353
116.777	8.11793	15.9111	121.24	9.69579	19.0038		-14.5409	4.46281	23.4666	-15.9111	0	15.9111								7	0	7.61656	7		0	48.5377	7
108.633	5.47306	10.7272	184.599	16.9349	33.1924		42.7731	75.9655	109.158	-10.7272	0	10.7272		7	0	7.61656	0	48.5377		7	0	7.61656	7		0	48.5377	7
107.666	4.49568	8.81153	118.386	6.22478	12.2006		-1.48012	10.7205	22.921	-8.81153	0	8.81153		7	0	7.61656	0	48.5377		7	0	7.61656	7		0	48.5377	7
101.586	6.62069	12.9766	149.586	16.1379	31.6303		16.3697	48	79.6303	-12.9766	0	12.9766		7	0	7.61656	0	48.5377
102.6	5.4	10.584	93.6	5.4	10.584		-19.584	-9	1.584	-10.584	0	10.584								8	-3.6	-7.2	8		-5.4	-14.4	8
102.6	5.4	10.584	102.6	7.2	14.112		-14.112	0	14.112	-10.584	0	10.584		8	-3.6	-7.2	-5.4	-14.4		8	0	-5.4	8		0	-9	8
102.6	5.4	10.584	104.4	7.2	14.112		-12.312	1.8	15.912	-10.584	0	10.584		8	0	-5.4	0	-9		8	3.6	-3.6	8		5.4	-3.6	8
126.761	15.493	30.3662	304.225	22.5352	44.169		133.296	177.465	221.634	-30.3662	0	30.3662		8	3.6	-3.6	5.4	-3.6
134.06	30.531	59.8407	430.803	54.6638	107.141		189.602	296.743	403.884	-59.8407	0	59.8407								9	-3.6	-9	9		-5.4	-7.2	9
134.056	27.3319	53.5705	430.803	54.6638	107.141		189.605	296.746	403.887	-53.5705	0	53.5705		9	-3.6	-9	-5.4	-7.2		9	0	-7.2	9		0	0	9
148.696	14.3478	28.1217	414.37	53.5995	105.055		160.62	265.675	370.73	-28.1217	0	28.1217		9	0	-7.2	0	0		9	3.6	-5.4	9		5.4	7.2	9
240.067	33.1473	64.9688	132.589	12.0536	23.625		-131.103	-107.478	-83.8527	-64.9688	0	64.9688		9	3.6	-5.4	5.4	7.2
94.3606	4.59373	9.0037	106.092	4.59192	9.00016		2.73113	11.7313	20.7315	-9.0037	0	9.0037								10	-3.6	-9	10		-5.4	-5.4	10
														10	-3.6	-9	-5.4	-5.4		10	0	-5.4	10		0	1.8	10
														10	0	-5.4	0	1.8		10	3.6	-1.8	10		5.4	9	10
(DZX-Con)-95% CI DZX	(DZX-Con)	(DZX-Con)+95% CI DZX	-95% CI Con	Control	+95% CI Con		Control	DZX						10	3.6	-1.8	5.4	9
-15.8731	-6.03352	3.80606	-3.39119	0	3.39119	1	-3.39119	-15.8731	1											11	-12.6761	49.2958	11		-15.493	154.93	11
-14.5409	4.46281	23.4666	-15.9111	0	15.9111	2	0	-6.03352	1					11	-12.6761	49.2958	-15.493	154.93		11	0	59.1549	11		0	177.465	11
42.7731	75.9655	109.158	-10.7272	0	10.7272	3	3.39119	3.80606	1					11	0	59.1549	0	177.465		11	12.6761	69.0141	11		15.493	200	11
-1.48012	10.7205	22.921	-8.81153	0	8.81153	4								11	12.6761	69.0141	15.493	200
16.3697	48	79.6303	-12.9766	0	12.9766	5	-15.9111	-14.5409	2											12	-10.6306	62.1565	12		-30.531	242.079	12
-19.584	-9	1.584	-10.584	0	10.584	6	0	4.46281	2					12	-10.6306	62.1565	-30.531	242.079		12	0	90.7899	12		0	296.743	12
-14.112	0	14.112	-10.584	0	10.584	7	15.9111	23.4666	2					12	0	90.7899	0	296.743		12	10.6306	119.423	12		30.531	351.407	12
-12.312	1.8	15.912	-10.584	0	10.584	8								12	10.6306	119.423	30.531	351.407
133.296	177.465	221.634	-30.3662	0	30.3662	9	-10.7272	42.7731	3											13	-14.3167	55.9653	13		-27.3319	242.082	13
189.602	296.743	403.884	-59.8407	0	59.8407	10	0	75.9655	3					13	-14.3167	55.9653	-27.3319	242.082		13	0	84.5987	13		0	296.746	13
189.605	296.746	403.887	-53.5705	0	53.5705	11	10.7272	109.158	3					13	0	84.5987	0	296.746		13	14.3167	113.232	13		27.3319	351.41	13
160.62	265.675	370.73	-28.1217	0	28.1217	12								13	14.3167	113.232	27.3319	351.41
-131.103	-107.478	-83.8527	-64.9688	0	64.9688	13	-8.81153	-1.48012	4											14	-14.3478	47.2901	14		-14.3478	212.075	14
2.73113	11.7313	20.7315	-9.0037	0	9.0037	14	0	10.7205	4					14	-14.3478	47.2901	-14.3478	212.075		14	0	86.5002	14		0	265.675	14
							8.81153	22.921	4					14	0	86.5002	0	265.675		14	14.3478	125.71	14		14.3478	319.274	14
														14	14.3478	125.71	14.3478	319.274
							-12.9766	16.3697	5											15	-10.0446	-3.01339	15		-33.1473	-119.531	15
							0	48	5					15	-10.0446	-3.01339	-33.1473	-119.531		15	0	4.01786	15		0	-107.478	15
							12.9766	79.6303	5					15	0	4.01786	0	-107.478		15	10.0446	11.0491	15		33.1473	-95.4241	15
														15	10.0446	11.0491	33.1473	-95.4241
							-10.584	-19.584	6											16	-3.06128	7.64778	16		-4.59373	7.13937	16
							0	-9	6					16	-3.06128	7.64778	-4.59373	7.13937		16	0	12.2433	16		0	11.7313	16
							10.584	1.584	6					16	0	12.2433	0	11.7313		16	3.06128	16.8388	16		4.59373	16.3232	16
														16	3.06128	16.8388	4.59373	16.3232
							-10.584	-14.112	7
							0	0	7
							10.584	14.112	7
							-10.584	-12.312	8
							0	1.8	8
							10.584	15.912	8
							-30.3662	133.296	9
							0	177.465	9
							30.3662	221.634	9
							-59.8407	189.602	10
							0	296.743	10
							59.8407	403.884	10
							-53.5705	189.605	11
							0	296.746	11
							53.5705	403.887	11
							-28.1217	160.62	12
							0	265.675	12
							28.1217	370.73	12
							-64.9688	-131.103	13
							0	-107.478	13
							64.9688	-83.8527	13
							-9.0037	2.73113	14
							0	11.7313	14
							9.0037	20.7315	14
	120 minutes/fed
	Placebo/Before treatment				DZX						only means compared
	mean	95% CI	upper bound	lower bound	mean	95% CI	upper bound	lower bound	IRKO > control	IRKO< Control	IRKO >Control	IRKO < Control
1	113.883	3.39119	117.274	110.491	107.849	9.83958	117.689	98.0096	0	0	0	1
2	116.777	15.9111	132.688	100.866	121.24	19.0038	140.243	102.236	0	0	1	0
3	108.633	10.7272	119.36	97.9061	184.599	33.1924	217.791	151.406	1	0	1	0
4	107.666	8.81153	116.477	98.8542	118.386	12.2006	130.587	106.186	0	0	1	0
5	101.586	12.9766	114.563	88.6097	149.586	31.6303	181.217	117.956	1	0	1	0
6	102.6	10.584	113.184	92.016	93.6	10.584	104.184	83.016	0	0	0	1
7	102.6	10.584	113.184	92.016	102.6	14.112	116.712	88.488	0	0	0	0
8	102.6	10.584	113.184	92.016	104.4	14.112	118.512	90.288	0	0	1	0
9	126.761	30.3662	157.127	96.3944	304.225	44.169	348.394	260.056	1	0	1	0
10	134.06	59.8407	193.9	74.2189	430.803	107.141	537.944	323.662	1	0	1	0
11	134.056	53.5705	187.627	80.4859	430.803	107.141	537.944	323.662	1	0	1	0
12	148.696	28.1217	176.817	120.574	414.37	105.055	519.425	309.315	1	0	1	0
13	240.067	64.9688	305.036	175.098	132.589	23.625	156.214	108.964	0	1	0	1
14	94.3606	9.0037	103.364	85.3569	106.092	9.00016	115.092	97.0917	0	0	1	0
									6	1	10	3
