# Supplementary material for: Driver versus navigator causation in biology: the case of insulin and fasting glucose
Source: PeerJ. 2020 Dec 11;8:e10396. doi: 10.7717/peerj.10396 (PMC7735078; doi:10.7717/peerj.10396)
Supplement: Supplemental Information 13 [file peerj-08-10396-s013.xlsx]

## Sheet: 120 minutes
	Reference	Treatment/condition	0 minutes/fasting				120 minutes/fed				0 minutes							120 minutes								0 minutes		120 minutes
			Placebo/Before treatment		OCT		Placebo/After treatment		OCT		OCT-Control			Control				OCT-Control			Control					Control	OCT	Control	OCT
			mean	SEM	mean	SEM	mean	SEM	mean	SEM	(OCT-Con)-SEM Con	(OCT-Con)	(OCT-Con)+SEM Con	-SEM Con	Control	+SEM Con		(OCT-Con)-SEM Con	(OCT-Con)	(OCT-Con)+SEM Con	-SEM Con	Control	+SEM Con		1	-4.2436	-12.0129	-7.77487	-7.07358
1	151. Masden et al 2011	OCT alone	97.1279	4.2436	92.8898	7.77487	131.06	7.77487	143.777	19.7906	-12.0129	-4.23808	3.53679	-4.2436	0	4.2436	1	-7.07358	12.717	32.5076	-7.77487	0	7.77487		1	0	-4.23808	0	12.717
2		OCT with pegvisomat	106.089	5.54736	110.248	4.16986	158.14	20.1392	181.039	23.6043	-0.0106783	4.15919	8.32905	-5.54736	0	5.54736	2	-0.704766	22.8995	46.5039	-20.1392	0	20.1392		1	4.2436	3.53679	7.77487	32.5076
3	229. Breckenbridge et al 2007	OCT treatment	83.2166	1.57481	83.2166	2.09919	60.5397	2.62469	76.5498	3.14907	-2.09919	0	2.09919	-1.57481	0	1.57481	3	12.861	16.01	19.1591	-2.62469	0	2.62469
4	332. Ronchi et al 2002	OCT treatment	83	9.5	104	27	107	34	121	34	-6	21	48	-9.5	0	9.5	4	-20	14	48	-34	0	34		2	-5.54736	-0.0106783	-20.1392	-0.704766
5	337. Parkinson et al 2002	OCT treatment	93.1742	5.44088	103.36	5.09181	100.306	13.2425	138.005	26.4921	5.09417	10.186	15.2778	-5.44088	0	5.44088	5	11.2072	37.6992	64.1913	-13.2425	0	13.2425		2	0	4.15919	0	22.8995
6	534. Giustina et al 1991	Insulin + 25µg OCT	204.365	0.2	228.408	21.919	257.574	11.667	209.846	21.566	2.124	24.043	45.962	-0.2	0	0.2	6	-69.294	-47.728	-26.162	-11.667	0	11.667		2	5.54736	8.32905	20.1392	46.5039
7		Insulin + 50µg OCT	204.365	0.2	201.187	17.68	257.574	11.667	183.688	14.851	-20.858	-3.178	14.502	-0.2	0	0.2	7	-88.737	-73.886	-59.035	-11.667	0	11.667
8		Insulin + 100µg OCT	204.365	0.2	203.66	0.2	257.574	11.667	197.12	12.729	-0.905	-0.705	-0.505	-0.2	0	0.2	8	-73.183	-60.454	-47.725	-11.667	0	11.667		3	-1.57481	-2.09919	-2.62469	12.861
9	576. Candrina and Giustina 1988	Insulin and OCT	130.915	11.564	149.239	13.491	195.659	14.946	147.968	15.906	4.833	18.324	31.815	-11.564	0	11.564	9	-63.597	-47.691	-31.785	-14.946	0	14.946		3	0	0	0	16.01
10	579. Williams et al 1988	OCT treatment in diabetics	258.696	36.18	213.462	39.798	345.528	37.998	343.71	30.762	-85.032	-45.234	-5.436	-36.18	0	36.18	10	-32.58	-1.818	28.944	-37.998	0	37.998		3	1.57481	2.09919	2.62469	19.1591
11	590. Johnston et al 1986	Non-diabetic	87.228	11.016	87.228	7.326	76.194	8.082	106.308	8.82	-7.326	0	7.326	-11.016	0	11.016	11	21.294	30.114	38.934	-8.082	0	8.082
12		Diabetic	159.012	6.912	155.916	11.538	168.174	19.98	208.188	6.912	-14.634	-3.096	8.442	-6.912	0	6.912	12	33.102	40.014	46.926	-19.98	0	19.98		4	-9.5	-6	-34	-20
13	592. Davies et al 1986	OCT treatment	147.924	27.18	217.53	8.712	187.074	15.228	150.084	16.308	60.894	69.606	78.318	-27.18	0	27.18	13	-53.298	-36.99	-20.682	-15.228	0	15.228		4	0	21	0	14
14	599. williams et al 1986	OCT treatment in diabetics (5µg)	176.508	12.852	163.638	5.508	259.146	18.378	247.194	8.262	-18.378	-12.87	-7.362	-12.852	0	12.852	14	-20.214	-11.952	-3.69	-18.378	0	18.378		4	9.5	48	34	48
15		OCT treatment in diabetics (100µg)	176.508	12.852	141.606	11.016	259.146	18.378	219.654	13.77	-45.918	-34.902	-23.886	-12.852	0	12.852	15	-53.262	-39.492	-25.722	-18.378	0	18.378
																									5	-5.44088	5.09417	-13.2425	11.2072
																									5	0	10.186	0	37.6992
																									5	5.44088	15.2778	13.2425	64.1913
120 minutes/fed
Placebo/Before treatment			OCT																						6	-0.2	2.124	-11.667	-69.294
mean	SEM	95% CI	mean	SEM	95% CI		(OCT-Con)-95% CI OCT	(OCT-Con)	(OCT-Con)+95% CI OCT	-95% CI Con	Control	+95% CI Con													6	0	24.043	0	-47.728
131.06	7.77487	15.2387	143.777	19.7906	38.7895	1	-26.0725	12.717	51.5065	-15.2387	0	15.2387													6	0.2	45.962	11.667	-26.162
158.14	20.1392	39.4729	181.039	23.6043	46.2644	2	-23.3649	22.8995	69.164	-39.4729	0	39.4729
60.5397	2.62469	5.14439	76.5498	3.14907	6.17217	3	9.83786	16.01	22.1822	-5.14439	0	5.14439													7	-0.2	-20.858	-11.667	-88.737
107	34	66.64	121	34	66.64	4	-52.64	14	80.64	-66.64	0	66.64													7	0	-3.178	0	-73.886
100.306	13.2425	25.9553	138.005	26.4921	51.9244	5	-14.2252	37.6992	89.6237	-25.9553	0	25.9553													7	0.2	14.502	11.667	-59.035
257.574	11.667	22.8673	209.846	21.566	42.2694	6	-89.9974	-47.728	-5.45864	-22.8673	0	22.8673
257.574	11.667	22.8673	183.688	14.851	29.108	7	-102.994	-73.886	-44.778	-22.8673	0	22.8673													8	-0.2	-0.905	-11.667	-73.183
257.574	11.667	22.8673	197.12	12.729	24.9488	8	-85.4028	-60.454	-35.5052	-22.8673	0	22.8673													8	0	-0.705	0	-60.454
195.659	14.946	29.2942	147.968	15.906	31.1758	9	-78.8668	-47.691	-16.5152	-29.2942	0	29.2942													8	0.2	-0.505	11.667	-47.725
345.528	37.998	74.4761	343.71	30.762	60.2935	10	-62.1115	-1.818	58.4755	-74.4761	0	74.4761
76.194	8.082	15.8407	106.308	8.82	17.2872	11	12.8268	30.114	47.4012	-15.8407	0	15.8407													9	-11.564	4.833	-14.946	-63.597
168.174	19.98	39.1608	208.188	6.912	13.5475	12	26.4665	40.014	53.5615	-39.1608	0	39.1608													9	0	18.324	0	-47.691
187.074	15.228	29.8469	150.084	16.308	31.9637	13	-68.9537	-36.99	-5.02632	-29.8469	0	29.8469													9	11.564	31.815	14.946	-31.785
259.146	18.378	36.0209	247.194	8.262	16.1935	14	-28.1455	-11.952	4.24152	-36.0209	0	36.0209
259.146	18.378	36.0209	219.654	13.77	26.9892	15	-66.4812	-39.492	-12.5028	-36.0209	0	36.0209													10	-36.18	-85.032	-37.998	-32.58
																									10	0	-45.234	0	-1.818
																									10	36.18	-5.436	37.998	28.944
	(OCT-Con)-95% CI OCT	(OCT-Con)	(OCT-Con)+95% CI OCT	-95% CI Con	Control	+95% CI Con		120 minutes/fed
1	-26.0725	12.717	51.5065	-15.2387	0	15.2387		Control	OCT																11	-11.016	-7.326	-8.082	21.294
2	-23.3649	22.8995	69.164	-39.4729	0	39.4729		-15.2387	-26.0725	1															11	0	0	0	30.114
3	9.83786	16.01	22.1822	-5.14439	0	5.14439		0	12.717	1															11	11.016	7.326	8.082	38.934
4	-52.64	14	80.64	-66.64	0	66.64		15.2387	51.5065	1
5	-14.2252	37.6992	89.6237	-25.9553	0	25.9553																			12	-6.912	-14.634	-19.98	33.102
6	-89.9974	-47.728	-5.45864	-22.8673	0	22.8673		-39.4729	-23.3649	2															12	0	-3.096	0	40.014
7	-102.994	-73.886	-44.778	-22.8673	0	22.8673		0	22.8995	2															12	6.912	8.442	19.98	46.926
8	-85.4028	-60.454	-35.5052	-22.8673	0	22.8673		39.4729	69.164	2
9	-78.8668	-47.691	-16.5152	-29.2942	0	29.2942																			13	-27.18	60.894	-15.228	-53.298
10	-62.1115	-1.818	58.4755	-74.4761	0	74.4761		-5.14439	9.83786	3															13	0	69.606	0	-36.99
11	12.8268	30.114	47.4012	-15.8407	0	15.8407		0	16.01	3															13	27.18	78.318	15.228	-20.682
12	26.4665	40.014	53.5615	-39.1608	0	39.1608		5.14439	22.1822	3
13	-68.9537	-36.99	-5.02632	-29.8469	0	29.8469																			14	-12.852	-18.378	-18.378	-20.214
14	-28.1455	-11.952	4.24152	-36.0209	0	36.0209		-66.64	-52.64	4															14	0	-12.87	0	-11.952
15	-66.4812	-39.492	-12.5028	-36.0209	0	36.0209		0	14	4															14	12.852	-7.362	18.378	-3.69
								66.64	80.64	4
																									15	-12.852	-45.918	-18.378	-53.262
								-25.9553	-14.2252	5															15	0	-34.902	0	-39.492
								0	37.6992	5															15	12.852	-23.886	18.378	-25.722
								25.9553	89.6237	5
								-22.8673	-89.9974	6
								0	-47.728	6
								22.8673	-5.45864	6
								-22.8673	-102.994	7
								0	-73.886	7
								22.8673	-44.778	7
								-22.8673	-85.4028	8
								0	-60.454	8
								22.8673	-35.5052	8
								-29.2942	-78.8668	9
								0	-47.691	9
								29.2942	-16.5152	9
								-74.4761	-62.1115	10
								0	-1.818	10
								74.4761	58.4755	10
								-15.8407	12.8268	11
								0	30.114	11
								15.8407	47.4012	11
								-39.1608	26.4665	12
								0	40.014	12
								39.1608	53.5615	12
								-29.8469	-68.9537	13
								0	-36.99	13
								29.8469	-5.02632	13
								-36.0209	-28.1455	14
								0	-11.952	14
								36.0209	4.24152	14
								-36.0209	-66.4812	15
								0	-39.492	15
								36.0209	-12.5028	15
	120 minutes/fed
	Placebo/Before treatment				OCT						only means compared
	mean	95% CI	upper bound	lower bound	mean	95% CI	upper bound	lower bound	OCT > control	OCT < Control	OCT>Con	Con> Oct
1	131.06	15.2387	146.299	115.821	143.777	38.7895	182.567	104.988	0	0	1	0
2	158.14	39.4729	197.613	118.667	181.039	46.2644	227.304	134.775	0	0	1	0
3	60.5397	5.14439	65.6841	55.3953	76.5498	6.17217	82.7219	70.3776	1	0	1	0
4	107	66.64	173.64	40.36	121	66.64	187.64	54.36	0	0	1	0
5	100.306	25.9553	126.261	74.3508	138.005	51.9244	189.93	86.0809	0	0	1	0
6	257.574	22.8673	280.441	234.707	209.846	42.2694	252.115	167.577	0	0	0	1
7	257.574	22.8673	280.441	234.707	183.688	29.108	212.796	154.58	0	1	0	1
8	257.574	22.8673	280.441	234.707	197.12	24.9488	222.069	172.171	0	1	0	1
9	195.659	29.2942	224.953	166.365	147.968	31.1758	179.144	116.792	0	0	0	1
10	345.528	74.4761	420.004	271.052	343.71	60.2935	404.004	283.416	0	0	0	1
11	76.194	15.8407	92.0347	60.3533	106.308	17.2872	123.595	89.0208	0	0	1	0
12	168.174	39.1608	207.335	129.013	208.188	13.5475	221.736	194.64	0	0	1	0
13	187.074	29.8469	216.921	157.227	150.084	31.9637	182.048	118.12	0	0	0	1
14	259.146	36.0209	295.167	223.125	247.194	16.1935	263.388	231	0	0	0	1
15	259.146	36.0209	295.167	223.125	219.654	26.9892	246.643	192.665	0	0	0	1
											7	8

## Sheet: 60 minutes
	Reference	Treatment/condition	0 minutes/fasting				60 minutes/fed				0 minutes							60 minutes
			Placebo/Before treatment		OCT		Placebo/After treatment		OCT		OCT-Control			Control				OCT-Control			Control					0 minutes		60 minutes
			mean	SEM	mean	SEM	mean	SEM	mean	SEM	(OCT-Con)-SEM Con	(OCT-Con)	(OCT-Con)+SEM Con	-SEM Con	Control	+SEM Con		(OCT-Con)-SEM Con	(OCT-Con)	(OCT-Con)+SEM Con	-SEM Con	Control	+SEM Con			Control	OCT	Control	OCT
1	151. Masden et al 2011	OCT alone	97.1279	4.2436	92.8898	7.77487	192.196	12.7198	168.162	20.5001	-12.0129	-4.23808	3.53679	-4.2436	0	4.2436	1	-44.5343	-24.0342	-3.53403	-12.7198	0	12.7198		1	-4.2436	-12.0129	-12.7198	-44.5343
		OCT with pegvisomat	106.089	5.54736	110.248	4.16986	208.808	8.32371	198.381	9.01246	-0.0106783	4.15919	8.32905	-5.54736	0	5.54736	2	-19.4398	-10.4273	-1.41487	-8.32371	0	8.32371		1	0	-4.23808	0	-24.0342
2	229. Breckenbridge et al 2007	OCT treatment	83.2166	1.57481	83.2166	2.09919	57.9656	3.41209	63.4775	1.57481	-2.09919	0	2.09919	-1.57481	0	1.57481	3	3.93703	5.51184	7.08665	-3.41209	0	3.41209		1	4.2436	3.53679	12.7198	-3.53403
3	337. Parkinson et al 2002	OCT treatment	93.1742	5.44088	103.36	5.09181	147.169	3.39848	196.415	20.721	5.09417	10.186	15.2778	-5.44088	0	5.44088	4	28.525	49.246	69.9671	-3.39848	0	3.39848
4	534. Giustina et al 1991	Insulin + 25µg OCT	204.365	0.2	228.408	21.919	200.92	13.436	217.537	23.332	2.124	24.043	45.962	-0.2	0	0.2	5	-6.715	16.617	39.949	-13.436	0	13.436		2	-5.54736	-0.0106783	-8.32371	-19.4398
		Insulin + 50µg OCT	204.365	0.2	201.187	17.68	200.92	13.436	188.547	16.615	-20.858	-3.178	14.502	-0.2	0	0.2	6	-28.988	-12.373	4.242	-13.436	0	13.436		2	0	4.15919	0	-10.4273
		Insulin + 100µg OCT	204.365	0.2	203.66	0.2	200.92	13.436	199.506	14.496	-0.905	-0.705	-0.505	-0.2	0	0.2	7	-15.91	-1.414	13.082	-13.436	0	13.436		2	5.54736	8.32905	8.32371	-1.41487
5	576. Candrina and Giustina 1988	Insulin and OCT	130.915	11.564	149.239	13.491	178.959	16.377	146.179	16.372	4.833	18.324	31.815	-11.564	0	11.564	8	-49.152	-32.78	-16.408	-16.377	0	16.377
6	579. Williams et al 1988	OCT treatment in diabetics	258.696	36.18	213.462	39.798	334.674	37.998	284.022	36.18	-85.032	-45.234	-5.436	-36.18	0	36.18	9	-86.832	-50.652	-14.472	-37.998	0	37.998		3	-1.57481	-2.09919	-3.41209	3.93703
7	590. Johnston et al 1986	Non-diabetic	87.228	11.016	87.228	7.326	76.554	6.606	157.41	22.014	-7.326	0	7.326	-11.016	0	11.016	10	58.842	80.856	102.87	-6.606	0	6.606		3	0	0	0	5.51184
		Diabetic	159.012	6.912	155.916	11.538	218.592	23.868	176.274	10.764	-14.634	-3.096	8.442	-6.912	0	6.912	11	-53.082	-42.318	-31.554	-23.868	0	23.868		3	1.57481	2.09919	3.41209	7.08665
8	592. Davies et al 1986	OCT treatment	147.924	27.18	217.53	8.712	221.868	23.94	187.074	19.584	60.894	69.606	78.318	-27.18	0	27.18	12	-54.378	-34.794	-15.21	-23.94	0	23.94
9	599. williams et al 1986	OCT treatment in diabetics (5µg)	176.508	12.852	163.638	5.508	256.86	12.852	228.402	2.772	-18.378	-12.87	-7.362	-12.852	0	12.852	13	-31.23	-28.458	-25.686	-12.852	0	12.852		4	-5.44088	5.09417	-3.39848	28.525
		OCT treatment in diabetics (100µg)	176.508	12.852	141.606	11.016	256.86	12.852	187.074	18.342	-45.918	-34.902	-23.886	-12.852	0	12.852	14	-88.128	-69.786	-51.444	-12.852	0	12.852		4	0	10.186	0	49.246
																									4	5.44088	15.2778	3.39848	69.9671
																									5	-0.2	2.124	-13.436	-6.715
60 minutes/fed																									5	0	24.043	0	16.617
Placebo/After treatment		OCT																							5	0.2	45.962	13.436	39.949
mean	SEM	95% CI	mean	SEM	95% CI		(OCT-Con)-95% CI OCT	(OCT-Con)	(OCT-Con)+95% CI OCT	-95% CI Con	Control	+95% CI Con
192.196	12.7198	24.9307	168.162	20.5001	40.1803	1	-64.2145	-24.0342	16.1461	-24.9307	0	24.9307													6	-0.2	-20.858	-13.436	-28.988
208.808	8.32371	16.3145	198.381	9.01246	17.6644	2	-28.0917	-10.4273	7.23709	-16.3145	0	16.3145													6	0	-3.178	0	-12.373
57.9656	3.41209	6.6877	63.4775	1.57481	3.08663	3	2.42521	5.51184	8.59847	-6.6877	0	6.6877													6	0.2	14.502	13.436	4.242
147.169	3.39848	6.66102	196.415	20.721	40.6132	4	8.63281	49.246	89.8593	-6.66102	0	6.66102
200.92	13.436	26.3346	217.537	23.332	45.7307	5	-29.1137	16.617	62.3477	-26.3346	0	26.3346													7	-0.2	-0.905	-13.436	-15.91
200.92	13.436	26.3346	188.547	16.615	32.5654	6	-44.9384	-12.373	20.1924	-26.3346	0	26.3346													7	0	-0.705	0	-1.414
200.92	13.436	26.3346	199.506	14.496	28.4122	7	-29.8262	-1.414	26.9982	-26.3346	0	26.3346													7	0.2	-0.505	13.436	13.082
178.959	16.377	32.0989	146.179	16.372	32.0891	8	-64.8691	-32.78	-0.69088	-32.0989	0	32.0989
334.674	37.998	74.4761	284.022	36.18	70.9128	9	-121.565	-50.652	20.2608	-74.4761	0	74.4761													8	-11.564	4.833	-16.377	-49.152
76.554	6.606	12.9478	157.41	22.014	43.1474	10	37.7086	80.856	124.003	-12.9478	0	12.9478													8	0	18.324	0	-32.78
218.592	23.868	46.7813	176.274	10.764	21.0974	11	-63.4154	-42.318	-21.2206	-46.7813	0	46.7813													8	11.564	31.815	16.377	-16.408
221.868	23.94	46.9224	187.074	19.584	38.3846	12	-73.1786	-34.794	3.59064	-46.9224	0	46.9224
256.86	12.852	25.1899	228.402	2.772	5.43312	13	-33.8911	-28.458	-23.0249	-25.1899	0	25.1899													9	-36.18	-85.032	-37.998	-86.832
256.86	12.852	25.1899	187.074	18.342	35.9503	14	-105.736	-69.786	-33.8357	-25.1899	0	25.1899													9	0	-45.234	0	-50.652
																									9	36.18	-5.436	37.998	-14.472
	(OCT-Con)-95% CI OCT	(OCT-Con)	(OCT-Con)+95% CI OCT	-95% CI Con	Control	+95% CI Con		60 minutes																	10	-11.016	-7.326	-6.606	58.842
1	-64.2145	-24.0342	16.1461	-24.9307	0	24.9307		Control	OCT																10	0	0	0	80.856
2	-28.0917	-10.4273	7.23709	-16.3145	0	16.3145		-24.9307	-64.2145	1															10	11.016	7.326	6.606	102.87
3	2.42521	5.51184	8.59847	-6.6877	0	6.6877		0	-24.0342	1
4	8.63281	49.246	89.8593	-6.66102	0	6.66102		24.9307	16.1461	1															11	-6.912	-14.634	-23.868	-53.082
5	-29.1137	16.617	62.3477	-26.3346	0	26.3346																			11	0	-3.096	0	-42.318
6	-44.9384	-12.373	20.1924	-26.3346	0	26.3346		-16.3145	-28.0917	2															11	6.912	8.442	23.868	-31.554
7	-29.8262	-1.414	26.9982	-26.3346	0	26.3346		0	-10.4273	2
8	-64.8691	-32.78	-0.69088	-32.0989	0	32.0989		16.3145	7.23709	2															12	-27.18	60.894	-23.94	-54.378
9	-121.565	-50.652	20.2608	-74.4761	0	74.4761																			12	0	69.606	0	-34.794
10	37.7086	80.856	124.003	-12.9478	0	12.9478		-6.6877	2.42521	3															12	27.18	78.318	23.94	-15.21
11	-63.4154	-42.318	-21.2206	-46.7813	0	46.7813		0	5.51184	3
12	-73.1786	-34.794	3.59064	-46.9224	0	46.9224		6.6877	8.59847	3															13	-12.852	-18.378	-12.852	-31.23
13	-33.8911	-28.458	-23.0249	-25.1899	0	25.1899																			13	0	-12.87	0	-28.458
14	-105.736	-69.786	-33.8357	-25.1899	0	25.1899		-6.66102	8.63281	4															13	12.852	-7.362	12.852	-25.686
								0	49.246	4
								6.66102	89.8593	4															14	-12.852	-45.918	-12.852	-88.128
																									14	0	-34.902	0	-69.786
								-26.3346	-29.1137	5															14	12.852	-23.886	12.852	-51.444
								0	16.617	5
								26.3346	62.3477	5
								-26.3346	-44.9384	6
								0	-12.373	6
								26.3346	20.1924	6
								-26.3346	-29.8262	7
								0	-1.414	7
								26.3346	26.9982	7
								-32.0989	-64.8691	8
								0	-32.78	8
								32.0989	-0.69088	8
								-74.4761	-121.565	9
								0	-50.652	9
								74.4761	20.2608	9
								-12.9478	37.7086	10
								0	80.856	10
								12.9478	124.003	10
								-46.7813	-63.4154	11
								0	-42.318	11
								46.7813	-21.2206	11
								-46.9224	-73.1786	12
								0	-34.794	12
								46.9224	3.59064	12
								-25.1899	-33.8911	13
								0	-28.458	13
								25.1899	-23.0249	13
								-25.1899	-105.736	14
								0	-69.786	14
								25.1899	-33.8357	14
	60 minutes/fed
	Placebo/After treatment				OCT						only means compared
	mean	95% CI	upper bound	lower bound	mean	95% CI	upper bound	lower bound	OCT > control	OCT < Control	OCT>Con	Con> Oct
1	192.196	24.9307	217.127	167.265	168.162	40.1803	208.342	127.982	0	0	0	1
2	208.808	16.3145	225.123	192.494	198.381	17.6644	216.045	180.716	0	0	0	1
3	57.9656	6.6877	64.6533	51.2779	63.4775	3.08663	66.5641	60.3909	0	0	1	0
4	147.169	6.66102	153.83	140.508	196.415	40.6132	237.028	155.802	1	0	1	0
5	200.92	26.3346	227.255	174.585	217.537	45.7307	263.268	171.806	0	0	1	0
6	200.92	26.3346	227.255	174.585	188.547	32.5654	221.112	155.982	0	0	0	1
7	200.92	26.3346	227.255	174.585	199.506	28.4122	227.918	171.094	0	0	0	1
8	178.959	32.0989	211.058	146.86	146.179	32.0891	178.268	114.09	0	0	0	1
9	334.674	74.4761	409.15	260.198	284.022	70.9128	354.935	213.109	0	0	0	1
10	76.554	12.9478	89.5018	63.6062	157.41	43.1474	200.557	114.263	1	0	1	0
11	218.592	46.7813	265.373	171.811	176.274	21.0974	197.371	155.177	0	0	0	1
12	221.868	46.9224	268.79	174.946	187.074	38.3846	225.459	148.689	0	0	0	1
13	256.86	25.1899	282.05	231.67	228.402	5.43312	233.835	222.969	0	0	0	1
14	256.86	25.1899	282.05	231.67	187.074	35.9503	223.024	151.124	0	1	0	1
									2	1	4	10

## Sheet: 90 minutes
	Reference	Treatment/condition	0 minutes/fasting				90 minutes/fed				0 minutes							90 minutes
			Placebo/Before treatment		OCT		Placebo/After treatment		OCT		OCT-Control			Control				OCT-Control			Control					0 minutes		90 minutes
			mean	SEM	mean	SEM	mean	SEM	mean	SEM	(OCT-Con)-SEM Con	(OCT-Con)	(OCT-Con)+SEM Con	-SEM Con	Control	+SEM Con		(OCT-Con)-SEM Con	(OCT-Con)	(OCT-Con)+SEM Con	-SEM Con	Control	+SEM Con			Control	OCT	Control	OCT
1	151. Masden et al 2011	OCT alone	97.1279	4.2436	92.8898	7.77487	170.106	15.5553	159.504	20.4946	-12.0129	-4.23808	3.53679	-4.2436	0	4.2436	1	-31.0967	-10.6021	9.89253	-15.5553	0	15.5553		1	-4.2436	-12.0129	-15.5553	-31.0967
		OCT with pegvisomat	106.089	5.54736	110.248	4.16986	199.438	21.5167	208.472	22.1948	-0.0106783	4.15919	8.32905	-5.54736	0	5.54736	2	-13.161	9.03381	31.2286	-21.5167	0	21.5167		1	0	-4.23808	0	-10.6021
2	229. Breckenbridge et al 2007	OCT treatment	83.2166	1.57481	83.2166	2.09919	59.5149	3.41209	70.2766	4.19894	-2.09919	0	2.09919	-1.57481	0	1.57481	3	6.56283	10.7618	14.9607	-3.41209	0	3.41209		1	4.2436	3.53679	15.5553	9.89253
3	337. Parkinson et al 2002	OCT treatment	93.1742	5.44088	103.36	5.09181	132.738	10.8699	186.055	19.7022	5.09417	10.186	15.2778	-5.44088	0	5.44088	4	33.6144	53.3166	73.0188	-10.8699	0	10.8699
4	534. Giustina et al 1991	Insulin + 25µg OCT	204.365	0.2	228.408	21.919	217.58	15.909	208.035	25.103	2.124	24.043	45.962	-0.2	0	0.2	5	-34.648	-9.545	15.558	-15.909	0	15.909		2	-5.54736	-0.0106783	-21.5167	-13.161
		Insulin + 50µg OCT	204.365	0.2	201.187	17.68	217.58	15.909	181.873	15.908	-20.858	-3.178	14.502	-0.2	0	0.2	6	-51.615	-35.707	-19.799	-15.909	0	15.909		2	0	4.15919	0	9.03381
		Insulin + 100µg OCT	204.365	0.2	203.66	0.2	217.58	15.909	193.894	13.081	-0.905	-0.705	-0.505	-0.2	0	0.2	7	-36.767	-23.686	-10.605	-15.909	0	15.909		2	5.54736	8.32905	21.5167	31.2286
5	576. Candrina and Giustina 1988	Insulin and OCT	130.915	11.564	149.239	13.491	191.412	16.377	147.059	15.896	4.833	18.324	31.815	-11.564	0	11.564	8	-60.249	-44.353	-28.457	-16.377	0	16.377
6	579. Williams et al 1988	OCT treatment in diabetics	258.696	36.18	213.462	39.798	361.818	28.944	327.438	30.762	-85.032	-45.234	-5.436	-36.18	0	36.18	9	-65.142	-34.38	-3.618	-28.944	0	28.944		3	-1.57481	-2.09919	-3.41209	6.56283
7	590. Johnston et al 1986	Non-diabetic	87.228	11.016	87.228	7.326	71.208	5.85	147.636	14.688	-7.326	0	7.326	-11.016	0	11.016	10	61.74	76.428	91.116	-5.85	0	5.85		3	0	0	0	10.7618
		Diabetic	159.012	6.912	155.916	11.538	194.562	16.182	209.916	6.138	-14.634	-3.096	8.442	-6.912	0	6.912	11	9.216	15.354	21.492	-16.182	0	16.182		3	1.57481	2.09919	3.41209	14.9607
8	599. williams et al 1986	OCT treatment in diabetics (5µg)	176.508	12.852	163.638	5.508	270.396	16.542	250.2	4.59	-18.378	-12.87	-7.362	-12.852	0	12.852	12	-24.786	-20.196	-15.606	-16.542	0	16.542
		OCT treatment in diabetics (100µg)	176.508	12.852	141.606	11.016	270.396	16.542	217.134	13.77	-45.918	-34.902	-23.886	-12.852	0	12.852	13	-67.032	-53.262	-39.492	-16.542	0	16.542		4	-5.44088	5.09417	-10.8699	33.6144
																									4	0	10.186	0	53.3166
																									4	5.44088	15.2778	10.8699	73.0188
90 minutes/fed
Placebo/After treatment			OCT																						5	-0.2	2.124	-15.909	-34.648
mean	SEM	95% CI	mean	SEM	95% CI		(OCT-Con)-95% CI OCT	(OCT-Con)	(OCT-Con)+95% CI OCT	-95% CI Con	Control	+95% CI Con													5	0	24.043	0	-9.545
170.106	15.5553	30.4883	159.504	20.4946	40.1695	1	-50.7716	-10.6021	29.5674	-30.4883	0	30.4883													5	0.2	45.962	15.909	15.558
199.438	21.5167	42.1728	208.472	22.1948	43.5018	2	-34.468	9.03381	52.5356	-42.1728	0	42.1728
59.5149	3.41209	6.6877	70.2766	4.19894	8.22993	3	2.53184	10.7618	18.9917	-6.6877	0	6.6877													6	-0.2	-20.858	-15.909	-51.615
132.738	10.8699	21.3051	186.055	19.7022	38.6163	4	14.7003	53.3166	91.9329	-21.3051	0	21.3051													6	0	-3.178	0	-35.707
217.58	15.909	31.1816	208.035	25.103	49.2019	5	-58.7469	-9.545	39.6569	-31.1816	0	31.1816													6	0.2	14.502	15.909	-19.799
217.58	15.909	31.1816	181.873	15.908	31.1797	6	-66.8867	-35.707	-4.52732	-31.1816	0	31.1816
217.58	15.909	31.1816	193.894	13.081	25.6388	7	-49.3248	-23.686	1.95276	-31.1816	0	31.1816													7	-0.2	-0.905	-15.909	-36.767
191.412	16.377	32.0989	147.059	15.896	31.1562	8	-75.5092	-44.353	-13.1968	-32.0989	0	32.0989													7	0	-0.705	0	-23.686
361.818	28.944	56.7302	327.438	30.762	60.2935	9	-94.6735	-34.38	25.9135	-56.7302	0	56.7302													7	0.2	-0.505	15.909	-10.605
71.208	5.85	11.466	147.636	14.688	28.7885	10	47.6395	76.428	105.216	-11.466	0	11.466
194.562	16.182	31.7167	209.916	6.138	12.0305	11	3.32352	15.354	27.3845	-31.7167	0	31.7167													8	-11.564	4.833	-16.377	-60.249
270.396	16.542	32.4223	250.2	4.59	8.9964	12	-29.1924	-20.196	-11.1996	-32.4223	0	32.4223													8	0	18.324	0	-44.353
270.396	16.542	32.4223	217.134	13.77	26.9892	13	-80.2512	-53.262	-26.2728	-32.4223	0	32.4223													8	11.564	31.815	16.377	-28.457
																									9	-36.18	-85.032	-28.944	-65.142
																									9	0	-45.234	0	-34.38
	(OCT-Con)-95% CI OCT	(OCT-Con)	(OCT-Con)+95% CI OCT	-95% CI Con	Control	+95% CI Con		90 minutes																	9	36.18	-5.436	28.944	-3.618
1	-50.7716	-10.6021	29.5674	-30.4883	0	30.4883		Control	OCT
2	-34.468	9.03381	52.5356	-42.1728	0	42.1728		-30.4883	-50.7716	1															10	-11.016	-7.326	-5.85	61.74
3	2.53184	10.7618	18.9917	-6.6877	0	6.6877		0	-10.6021	1															10	0	0	0	76.428
4	14.7003	53.3166	91.9329	-21.3051	0	21.3051		30.4883	29.5674	1															10	11.016	7.326	5.85	91.116
5	-58.7469	-9.545	39.6569	-31.1816	0	31.1816
6	-66.8867	-35.707	-4.52732	-31.1816	0	31.1816		-42.1728	-34.468	2															11	-6.912	-14.634	-16.182	9.216
7	-49.3248	-23.686	1.95276	-31.1816	0	31.1816		0	9.03381	2															11	0	-3.096	0	15.354
8	-75.5092	-44.353	-13.1968	-32.0989	0	32.0989		42.1728	52.5356	2															11	6.912	8.442	16.182	21.492
9	-94.6735	-34.38	25.9135	-56.7302	0	56.7302
10	47.6395	76.428	105.216	-11.466	0	11.466		-6.6877	2.53184	3															12	-12.852	-18.378	-16.542	-24.786
11	3.32352	15.354	27.3845	-31.7167	0	31.7167		0	10.7618	3															12	0	-12.87	0	-20.196
12	-29.1924	-20.196	-11.1996	-32.4223	0	32.4223		6.6877	18.9917	3															12	12.852	-7.362	16.542	-15.606
13	-80.2512	-53.262	-26.2728	-32.4223	0	32.4223
								-21.3051	14.7003	4															13	-12.852	-45.918	-16.542	-67.032
								0	53.3166	4															13	0	-34.902	0	-53.262
								21.3051	91.9329	4															13	12.852	-23.886	16.542	-39.492
								-31.1816	-58.7469	5
								0	-9.545	5
								31.1816	39.6569	5
								-31.1816	-66.8867	6
								0	-35.707	6
								31.1816	-4.52732	6
								-31.1816	-49.3248	7
								0	-23.686	7
								31.1816	1.95276	7
								-32.0989	-75.5092	8
								0	-44.353	8
								32.0989	-13.1968	8
								-56.7302	-94.6735	9
								0	-34.38	9
								56.7302	25.9135	9
								-11.466	47.6395	10
								0	76.428	10
								11.466	105.216	10
								-31.7167	3.32352	11
								0	15.354	11
								31.7167	27.3845	11
								-32.4223	-29.1924	12
								0	-20.196	12
								32.4223	-11.1996	12
								-32.4223	-80.2512	13
								0	-53.262	13
								32.4223	-26.2728	13
	90 minutes/fed
	Placebo/After treatment				OCT						only means compared
	mean	95% CI	upper bound	lower bound	mean	95% CI	upper bound	lower bound	OCT > control	OCT < Control	OCT>Con	Con> Oct
1	170.106	30.4883	200.594	139.617	159.504	40.1695	199.673	119.334	0	0	0	1
2	199.438	42.1728	241.611	157.265	208.472	43.5018	251.974	164.97	0	0	1	0
3	59.5149	6.6877	66.2026	52.8272	70.2766	8.22993	78.5066	62.0467	0	0	1	0
4	132.738	21.3051	154.043	111.433	186.055	38.6163	224.671	147.439	0	0	1	0
5	217.58	31.1816	248.762	186.398	208.035	49.2019	257.237	158.833	0	0	0	1
6	217.58	31.1816	248.762	186.398	181.873	31.1797	213.053	150.693	0	0	0	1
7	217.58	31.1816	248.762	186.398	193.894	25.6388	219.533	168.255	0	0	0	1
8	191.412	32.0989	223.511	159.313	147.059	31.1562	178.215	115.903	0	0	0	1
9	361.818	56.7302	418.548	305.088	327.438	60.2935	387.732	267.144	0	0	0	1
10	71.208	11.466	82.674	59.742	147.636	28.7885	176.424	118.848	1	0	1	0
11	194.562	31.7167	226.279	162.845	209.916	12.0305	221.946	197.886	0	0	1	0
12	270.396	32.4223	302.818	237.974	250.2	8.9964	259.196	241.204	0	0	0	1
13	270.396	32.4223	302.818	237.974	217.134	26.9892	244.123	190.145	0	0	0	1
									1	0	5	8

## Sheet: 30 minutes
																																								l
Reference	Treatment/condition	0 minutes/fasting				30 minutes/fed				0 minutes							30 minutes								0 minutes		30 minutes
		Placebo/Before treatment		OCT		Placebo/After treatment		OCT		OCT-Control			Control				OCT-Control			Control					Control	OCT	Control	OCT
		mean	SEM	mean	SEM	mean	SEM	mean	SEM	(OCT-Con)-SEM Con	(OCT-Con)	(OCT-Con)+SEM Con	-SEM Con	Control	+SEM Con		(OCT-Con)-SEM Con	(OCT-Con)	(OCT-Con)+SEM Con	-SEM Con	Control	+SEM Con		1	-4.2436	-12.0129	-10.6049	-16.9634
151. Masden et al 2011	OCT alone	97.1279	4.2436	92.8898	7.77487	141.48	10.6049	135.828	11.3117	-12.0129	-4.23808	3.53679	-4.2436	0	4.2436	1	-16.9634	-5.65169	5.65997	-10.6049	0	10.6049		1	0	-4.23808	0	-5.65169
	OCT with pegvisomat	106.089	5.54736	110.248	4.16986	161.253	4.86395	159.176	6.24679	-0.0106783	4.15919	8.32905	-5.54736	0	5.54736	2	-8.32371	-2.07692	4.16986	-4.86395	0	4.86395		1	4.2436	3.53679	10.6049	5.65997
229. Breckenbridge et al 2007		83.2166	1.57481	83.2166	2.09919	69.016	1.04987	71.1158	2.09919	-2.09919	0	2.09919	-1.57481	0	1.57481	3	0.000556078	2.09975	4.19894	-1.04987	0	1.04987
337. Parkinson et al 2002		93.1742	5.44088	103.36	5.09181	142.923	8.14831	145.645	9.16951	5.09417	10.186	15.2778	-5.44088	0	5.44088	4	-6.44788	2.72163	11.8911	-8.14831	0	8.14831		2	-5.54736	-0.0106783	-4.86395	-8.32371
534. Giustina et al 1991	Insulin + 25µg OCT	204.365	0.2	228.408	21.919	202.645	12.373	229.867	24.041	2.124	24.043	45.962	-0.2	0	0.2	5	3.181	27.222	51.263	-12.373	0	12.373		2	0	4.15919	0	-2.07692
	Insulin + 50µg OCT	204.365	0.2	201.187	17.68	202.645	12.373	201.938	13.433	-20.858	-3.178	14.502	-0.2	0	0.2	6	-14.14	-0.707	12.726	-12.373	0	12.373		2	5.54736	8.32905	4.86395	4.16986
	Insulin + 100µg OCT	204.365	0.2	203.66	0.2	202.645	12.373	201.582	13.081	-0.905	-0.705	-0.505	-0.2	0	0.2	7	-14.144	-1.063	12.018	-12.373	0	12.373
576. Candrina and Giustina 1988	Insulin and OCT	130.915	11.564	149.239	13.491	156.874	9.636	143.86	17.351	4.833	18.324	31.815	-11.564	0	11.564	8	-30.365	-13.014	4.337	-9.636	0	9.636		3	-1.57481	-2.09919	-1.04987	0.000556078
579. Williams et al 1988	OCT treatment in diabetics	258.696	36.18	213.462	39.798	298.494	43.416	236.988	48.852	-85.032	-45.234	-5.436	-36.18	0	36.18	9	-110.358	-61.506	-12.654	-43.416	0	43.416		3	0	0	0	2.09975
590. Johnston et al 1986	Non-diabetic	87.228	11.016	87.228	7.326	90.054	3.672	78.282	5.868	-7.326	0	7.326	-11.016	0	11.016	10	-17.64	-11.772	-5.904	-3.672	0	3.672		3	1.57481	2.09919	1.04987	4.19894
	Diabetic	159.012	6.912	155.916	11.538	160.416	7.704	154.26	9.99	-14.634	-3.096	8.442	-6.912	0	6.912	11	-16.146	-6.156	3.834	-7.704	0	7.704
592. Davies et al 1986	OCT treatment	147.924	27.18	217.53	8.712	177.282	21.744	218.61	8.694	60.894	69.606	78.318	-27.18	0	27.18	12	32.634	41.328	50.022	-21.744	0	21.744		4	-5.44088	5.09417	-8.14831	-6.44788
599. williams et al 1986	OCT treatment in diabetics (5µg)	176.508	12.852	163.638	5.508	217.602	8.28	189.144	4.59	-18.378	-12.87	-7.362	-12.852	0	12.852	13	-33.048	-28.458	-23.868	-8.28	0	8.28		4	0	10.186	0	2.72163
	OCT treatment in diabetics (100µg)	176.508	12.852	141.606	11.016	217.602	8.28	154.224	14.706	-45.918	-34.902	-23.886	-12.852	0	12.852	14	-78.084	-63.378	-48.672	-8.28	0	8.28		4	5.44088	15.2778	8.14831	11.8911
																								5	-0.2	2.124	-12.373	3.181
																								5	0	24.043	0	27.222
																								5	0.2	45.962	12.373	51.263
30 minutes/fed																								6	-0.2	-20.858	-12.373	-14.14
Placebo/Before treatment			OCT																					6	0	-3.178	0	-0.707
mean	SEM	95% CI	mean	SEM	95% CI		(OCT-Con)-95% CI OCT	(OCT-Con)	(OCT-Con)+95% CI OCT	-95% CI Con	Control	+95% CI Con												6	0.2	14.502	12.373	12.726
141.48	10.6049	20.7855	135.828	11.3117	22.1709	1	-27.8225	-5.65169	16.5192	-20.7855	0	20.7855
161.253	4.86395	9.53334	159.176	6.24679	12.2437	2	-14.3206	-2.07692	10.1668	-9.53334	0	9.53334												7	-0.2	-0.905	-12.373	-14.144
69.016	1.04987	2.05775	71.1158	2.09919	4.11442	3	-2.01467	2.09975	6.21417	-2.05775	0	2.05775												7	0	-0.705	0	-1.063
142.923	8.14831	15.9707	145.645	9.16951	17.9722	4	-15.2506	2.72163	20.6939	-15.9707	0	15.9707												7	0.2	-0.505	12.373	12.018
202.645	12.373	24.2511	229.867	24.041	47.1204	5	-19.8984	27.222	74.3424	-24.2511	0	24.2511
202.645	12.373	24.2511	201.938	13.433	26.3287	6	-27.0357	-0.707	25.6217	-24.2511	0	24.2511												8	-11.564	4.833	-9.636	-30.365
202.645	12.373	24.2511	201.582	13.081	25.6388	7	-26.7018	-1.063	24.5758	-24.2511	0	24.2511												8	0	18.324	0	-13.014
156.874	9.636	18.8866	143.86	17.351	34.008	8	-47.022	-13.014	20.994	-18.8866	0	18.8866												8	11.564	31.815	9.636	4.337
298.494	43.416	85.0954	236.988	48.852	95.7499	9	-157.256	-61.506	34.2439	-85.0954	0	85.0954
90.054	3.672	7.19712	78.282	5.868	11.5013	10	-23.2733	-11.772	-0.27072	-7.19712	0	7.19712												9	-36.18	-85.032	-43.416	-110.358
160.416	7.704	15.0998	154.26	9.99	19.5804	11	-25.7364	-6.156	13.4244	-15.0998	0	15.0998												9	0	-45.234	0	-61.506
177.282	21.744	42.6182	218.61	8.694	17.0402	12	24.2878	41.328	58.3682	-42.6182	0	42.6182												9	36.18	-5.436	43.416	-12.654
217.602	8.28	16.2288	189.144	4.59	8.9964	13	-37.4544	-28.458	-19.4616	-16.2288	0	16.2288
217.602	8.28	16.2288	154.224	14.706	28.8238	14	-92.2018	-63.378	-34.5542	-16.2288	0	16.2288												10	-11.016	-7.326	-3.672	-17.64
																								10	0	0	0	-11.772
																								10	11.016	7.326	3.672	-5.904
	(OCT-Con)-95% CI OCT	(OCT-Con)	(OCT-Con)+95% CI OCT	-95% CI Con	Control	+95% CI Con		30 minutes
1	-27.8225	-5.65169	16.5192	-20.7855	0	20.7855		Control	OCT															11	-6.912	-14.634	-7.704	-16.146
2	-14.3206	-2.07692	10.1668	-9.53334	0	9.53334		-20.7855	-27.8225	1														11	0	-3.096	0	-6.156
3	-2.01467	2.09975	6.21417	-2.05775	0	2.05775		0	-5.65169	1														11	6.912	8.442	7.704	3.834
4	-15.2506	2.72163	20.6939	-15.9707	0	15.9707		20.7855	16.5192	1
5	-19.8984	27.222	74.3424	-24.2511	0	24.2511																		12	-27.18	60.894	-21.744	32.634
6	-27.0357	-0.707	25.6217	-24.2511	0	24.2511		-9.53334	-14.3206	2														12	0	69.606	0	41.328
7	-26.7018	-1.063	24.5758	-24.2511	0	24.2511		0	-2.07692	2														12	27.18	78.318	21.744	50.022
8	-47.022	-13.014	20.994	-18.8866	0	18.8866		9.53334	10.1668	2
9	-157.256	-61.506	34.2439	-85.0954	0	85.0954																		13	-12.852	-18.378	-8.28	-33.048
10	-23.2733	-11.772	-0.27072	-7.19712	0	7.19712		-2.05775	-2.01467	3														13	0	-12.87	0	-28.458
11	-25.7364	-6.156	13.4244	-15.0998	0	15.0998		0	2.09975	3														13	12.852	-7.362	8.28	-23.868
12	24.2878	41.328	58.3682	-42.6182	0	42.6182		2.05775	6.21417	3
13	-37.4544	-28.458	-19.4616	-16.2288	0	16.2288																		14	-12.852	-45.918	-8.28	-78.084
14	-92.2018	-63.378	-34.5542	-16.2288	0	16.2288		-15.9707	-15.2506	4														14	0	-34.902	0	-63.378
								0	2.72163	4														14	12.852	-23.886	8.28	-48.672
								15.9707	20.6939	4
								-24.2511	-19.8984	5
								0	27.222	5
								24.2511	74.3424	5
								-24.2511	-27.0357	6
								0	-0.707	6
								24.2511	25.6217	6
								-24.2511	-26.7018	7
								0	-1.063	7
								24.2511	24.5758	7
								-18.8866	-47.022	8
								0	-13.014	8
								18.8866	20.994	8
								-85.0954	-157.256	9
								0	-61.506	9
								85.0954	34.2439	9
								-7.19712	-23.2733	10
								0	-11.772	10
								7.19712	-0.27072	10
								-15.0998	-25.7364	11
								0	-6.156	11
								15.0998	13.4244	11
								-42.6182	24.2878	12
								0	41.328	12
								42.6182	58.3682	12
								-16.2288	-37.4544	13
								0	-28.458	13
								16.2288	-19.4616	13
								-16.2288	-92.2018	14
								0	-63.378	14
								16.2288	-34.5542	14
	30 minutes/fed
	Placebo/Before treatment				OCT						only means compared
	mean	95% CI	upper bound	lower bound	mean	95% CI	upper bound	lower bound	OCT > control	OCT < Control	OCT>Con	Con> Oct
1	141.48	20.7855	162.265	120.694	135.828	22.1709	157.999	113.657	0	0	0	1
2	161.253	9.53334	170.786	151.719	159.176	12.2437	171.419	146.932	0	0	0	1
3	69.016	2.05775	71.0738	66.9583	71.1158	4.11442	75.2302	67.0014	0	0	1	0
4	142.923	15.9707	158.894	126.952	145.645	17.9722	163.617	127.673	0	0	1	0
5	202.645	24.2511	226.896	178.394	229.867	47.1204	276.987	182.747	0	0	1	0
6	202.645	24.2511	226.896	178.394	201.938	26.3287	228.267	175.609	0	0	0	1
7	202.645	24.2511	226.896	178.394	201.582	25.6388	227.221	175.943	0	0	0	1
8	156.874	18.8866	175.761	137.987	143.86	34.008	177.868	109.852	0	0	0	1
9	298.494	85.0954	383.589	213.399	236.988	95.7499	332.738	141.238	0	0	0	1
10	90.054	7.19712	97.2511	82.8569	78.282	11.5013	89.7833	66.7807	0	0	0	1
11	160.416	15.0998	175.516	145.316	154.26	19.5804	173.84	134.68	0	0	0	1
12	177.282	42.6182	219.9	134.664	218.61	17.0402	235.65	201.57	0	0	1	0
13	217.602	16.2288	233.831	201.373	189.144	8.9964	198.14	180.148	0	1	0	1
14	217.602	16.2288	233.831	201.373	154.224	28.8238	183.048	125.4	0	1	0	1
									0	2	4	10

## Sheet: fasting
0 minutes/fasting
Placebo/Before treatment			OCT
mean	SEM	95% CI	mean	SEM	95% CI		(OCT-Con)-95% CI OCT	(OCT-Con)	(OCT-Con)+95% CI OCT	-95% CI Con	Control	+95% CI Con
97.1279	4.2436	8.31745	92.8898	7.77487	15.2387	1	-19.4768	-4.23808	11.0007	-8.31745	0	8.31745
106.089	5.54736	10.8728	110.248	4.16986	8.17293	2	-4.01375	4.15919	12.3321	-10.8728	0	10.8728
83.2166	1.57481	3.08663	83.2166	2.09919	4.11442	3	-4.11442	0	4.11442	-3.08663	0	3.08663
83	9.5	18.62	104	27	52.92	4	-31.92	21	73.92	-18.62	0	18.62
93.1742	5.44088	10.6641	103.36	5.09181	9.97994	5	0.206039	10.186	20.1659	-10.6641	0	10.6641
204.365	0.2	0.392	228.408	21.919	42.9612	6	-18.9182	24.043	67.0042	-0.392	0	0.392
204.365	0.2	0.392	201.187	17.68	34.6528	7	-37.8308	-3.178	31.4748	-0.392	0	0.392
204.365	0.2	0.392	203.66	0.2	0.392	8	-1.097	-0.705	-0.313	-0.392	0	0.392
130.915	11.564	22.6654	149.239	13.491	26.4424	9	-8.11836	18.324	44.7664	-22.6654	0	22.6654
258.696	36.18	70.9128	213.462	39.798	78.0041	10	-123.238	-45.234	32.7701	-70.9128	0	70.9128
87.228	11.016	21.5914	87.228	7.326	14.359	11	-14.359	0	14.359	-21.5914	0	21.5914
159.012	6.912	13.5475	155.916	11.538	22.6145	12	-25.7105	-3.096	19.5185	-13.5475	0	13.5475
147.924	27.18	53.2728	217.53	8.712	17.0755	13	52.5305	69.606	86.6815	-53.2728	0	53.2728
176.508	12.852	25.1899	163.638	5.508	10.7957	14	-23.6657	-12.87	-2.07432	-25.1899	0	25.1899
176.508	12.852	25.1899	141.606	11.016	21.5914	15	-56.4934	-34.902	-13.3106	-25.1899	0	25.1899
	(OCT-Con)-95% CI OCT	(OCT-Con)	(OCT-Con)+95% CI OCT	-95% CI Con	Control	+95% CI Con		Fasting
1	-19.4768	-4.23808	11.0007	-8.31745	0	8.31745		Control	OCT		Duration of fasting
2	-4.01375	4.15919	12.3321	-10.8728	0	10.8728		-8.31745	-19.4768	1	ON
3	-4.11442	0	4.11442	-3.08663	0	3.08663		0	-4.23808	1
4	-31.92	21	73.92	-18.62	0	18.62		8.31745	11.0007	1
5	0.206039	10.186	20.1659	-10.6641	0	10.6641
6	-18.9182	24.043	67.0042	-0.392	0	0.392		-10.8728	-4.01375	2	ON
7	-37.8308	-3.178	31.4748	-0.392	0	0.392		0	4.15919	2
8	-1.097	-0.705	-0.313	-0.392	0	0.392		10.8728	12.3321	2
9	-8.11836	18.324	44.7664	-22.6654	0	22.6654
10	-123.238	-45.234	32.7701	-70.9128	0	70.9128		-3.08663	-4.11442	3	ON
11	-14.359	0	14.359	-21.5914	0	21.5914		0	0	3
12	-25.7105	-3.096	19.5185	-13.5475	0	13.5475		3.08663	4.11442	3
13	52.5305	69.606	86.6815	-53.2728	0	53.2728
14	-23.6657	-12.87	-2.07432	-25.1899	0	25.1899		-18.62	-31.92	4	ON
15	-56.4934	-34.902	-13.3106	-25.1899	0	25.1899		0	21	4
								18.62	73.92	4
								-10.6641	0.206039	5	ON
								0	10.186	5
								10.6641	20.1659	5
								-0.392	-18.9182	6	ON
								0	24.043	6
								0.392	67.0042	6
								-0.392	-37.8308	7	ON
								0	-3.178	7
								0.392	31.4748	7
								-0.392	-1.097	8	ON
								0	-0.705	8
								0.392	-0.313	8
								-22.6654	-8.11836	9	ON
								0	18.324	9
								22.6654	44.7664	9
								-70.9128	-123.238	10	ON
								0	-45.234	10
								70.9128	32.7701	10
								-21.5914	-14.359	11	ON
								0	0	11
								21.5914	14.359	11
								-13.5475	-25.7105	12	ON
								0	-3.096	12
								13.5475	19.5185	12
								-53.2728	52.5305	13	10 hours
								0	69.606	13
								53.2728	86.6815	13
								-25.1899	-23.6657	14	ON
								0	-12.87	14
								25.1899	-2.07432	14
								-25.1899	-56.4934	15	ON
								0	-34.902	15
								25.1899	-13.3106	15
	0 minutes/fasting
	Placebo/Before treatment				OCT						only means compared
	mean	95% CI	upper bound	lower bound	mean	95% CI	upper bound	lower bound	OCT > control	OCT < Control	OCT>Con	Con> Oct
1	97.1279	8.31745	105.445	88.8104	92.8898	15.2387	108.129	77.6511	0	0	0	1
2	106.089	10.8728	116.961	95.2158	110.248	8.17293	118.421	102.075	0	0	1	0
3	83.2166	3.08663	86.3032	80.1299	83.2166	4.11442	87.331	79.1022	0	0	0	0
4	83	18.62	101.62	64.38	104	52.92	156.92	51.08	0	0	1	0
5	93.1742	10.6641	103.838	82.5101	103.36	9.97994	113.34	93.3803	0	0	1	0
6	204.365	0.392	204.757	203.973	228.408	42.9612	271.369	185.447	0	0	1	0
7	204.365	0.392	204.757	203.973	201.187	34.6528	235.84	166.534	0	0	0	1
8	204.365	0.392	204.757	203.973	203.66	0.392	204.052	203.268	0	0	0	1
9	130.915	22.6654	153.58	108.25	149.239	26.4424	175.681	122.797	0	0	1	0
10	258.696	70.9128	329.609	187.783	213.462	78.0041	291.466	135.458	0	0	0	1
11	87.228	21.5914	108.819	65.6366	87.228	14.359	101.587	72.869	0	0	0	0
12	159.012	13.5475	172.56	145.464	155.916	22.6145	178.53	133.302	0	0	0	1
13	147.924	53.2728	201.197	94.6512	217.53	17.0755	234.606	200.454	0	0	1	0
14	176.508	25.1899	201.698	151.318	163.638	10.7957	174.434	152.842	0	0	0	1
15	176.508	25.1899	201.698	151.318	141.606	21.5914	163.197	120.015	0	0	0	1
											6	7
