# Supplementary material for: Driver versus navigator causation in biology: the case of insulin and fasting glucose
Source: PeerJ. 2020 Dec 11;8:e10396. doi: 10.7717/peerj.10396 (PMC7735078; doi:10.7717/peerj.10396)
Supplement: Supplemental Information 14 [file peerj-08-10396-s014.xlsx]

## Sheet: all data 
15 minutes	Reference	Kind of IRKO		0 minutes/fasting						15 minutes/fed
				Control			IRKO			Control			IRKO
			Sr. no.	mean	SEM	95% CI	mean	SEM	95% CI	mean	SEM	95% CI	mean	SEM	95% CI
1	Sakaguchi et al 2017	inducible DO IR and IGF-R	1	149.837	10.5611	20.6997	230.365	14.5215	28.462	364.191	9.24292	18.1161	486.965	28.3828	55.6304
2	Kawamori et al 2009	αIRKO (2 months old)	2	78.3232	0	0	61.6545	3.16539	6.20417	255.101	11.1104	21.7765	251.933	30.9505	60.663
		αIRKO (5 months old)	3	78.2924	0	0	78.2924	0	0	296.201	0	0	264.427	0	0
3	Haas et al 2012	LIRKO	4	79.3492	3.08317	6.04302	64.676	7.72237	15.1358	161.644	8.87655	17.398	193.285	8.87174	17.3886
4	Blueher et al 2002	FIRKO (2 months old)	5	64.6079	5.06297	9.92342	53.4694	3.79723	7.44256	152.963	5.06297	9.92342	149.925	3.54408	6.94639
		FIRKO (10 months old)	6	80.9588	5.28733	10.3632	59.7989	3.77818	7.40523	199.977	3.77289	7.39486	161.183	3.27442	6.41786
5	Bruening et al 1998	MIRKO	7	52.9826	5.43467	10.6519	63.8519	4.076	7.98896	147.755	19.0213	37.2818	183.086	12.5677	24.6326
6	Wojtaszewski et al 1999	MIRKO	8	96.6894	3.46411	6.78966	73.1334	5.88899	11.5424	200.494	5.54258	10.8635	199.112	9.69951	19.011
7	Mauvais-Jarvis et al 2000	βIRKO(2 months old)	9	64.0294	5.91354	11.5905	59.7434	0	0	180.294	6.98873	13.6979	204.501	1.61278	3.16106
		βIRKO(6 months old)	10	83.0582	6.31049	12.3686	107.335	6.31049	12.3686	211.826	5.33964	10.4657	305.02	14.0772	27.5914
		MIRKO(2 months old)	11	64.0294	5.91354	11.5905	61.879	2.15038	4.21474	180.294	6.98873	13.6979	166.855	6.98873	13.6979
		MIRKO(6 months old)	12	83.0582	6.31049	12.3686	74.3267	0	0	211.826	5.33964	10.4657	200.169	7.28133	14.2714
		βIRKO-MIRKO (2 months old)	13	64.0294	5.91354	11.5905	51.1271	0	0	180.294	6.98873	13.6979	195.877	0	0
		βIRKO-MIRKO (6 months old)	14	83.0582	6.31049	12.3686	75.2853	6.31355	12.3746	211.826	5.33964	10.4657	243.863	16.5043	32.3485
30 minutes	Reference	Kind of IRKO		0 minutes/fasting						30 minutes/fed
				Control			IRKO			Control			IRKO
			Sr. no.	mean	SEM	95% CI	mean	SEM	95% CI	mean	SEM	95% CI	mean	SEM	95% CI
1	Sakaguchi et al 2017	inducible DO IR and IGF-R	1	149.837	10.5611	20.6997	230.365	14.5215	28.462	248.522	11.8792	23.2832	509.906	23.7604	46.5703
2	Kawamori et al 2009	αIRKO (2 months old)	2	78.3232	0	0	61.6545	3.16539	6.20417	219.984	11.904	23.3319	304.118	41.2644	80.8781
		αIRKO (5 months old)	3	78.2924	0	0	78.2924	0	0	257.422	0	0	294.802	18.0679	35.4131
3	Escribano et al 2009	LIRKO (2 months old)	4	75.5674	3.00344	5.88674	85.9527	5.49998	10.78	208.635	24.6334	48.2814	314.851	21.4999	42.1399
		LIRKO (4 months old)	5	80.4026	9.65867	18.931	93.6807	16.9013	33.1266	233.961	13.2796	26.0281	336.578	21.3279	41.8027
		LIRKO (6 months old)	6	115.625	15.2344	29.8594	105.469	12.8906	25.2656	225.781	17.5781	34.4531	381.72	45.7825	89.7337
		LIRKO (12 months old)	7	129.491	14.485	28.3906	95.693	10.6223	20.8197	212.73	21.7275	42.5858	381.72	23.176	45.4249
4	Ealey et al 2008	MIRKO (7 weeks old)	8	95.092	12.2699	24.0491	91.2577	5.3681	10.5215	436.067	6.13991	12.0342	431.465	16.1043	31.5644
		MIRKO (16 weeks old)	9	73.9796	2.50787	4.91542	87.7705	12.5393	24.5771	380.836	15.0472	29.4925	385.222	16.9281	33.1791
		MIRKO (24 weeks old)	10	92.5034	11.2504	22.0508	98.7463	11.2504	22.0508	332.288	21.2508	41.6515	349.785	21.2508	41.6515
		MIRKO (40 weeks old)	11	82.7586	9.1954	18.023	72.4138	12.069	23.6552	299.425	18.9655	37.1724	358.621	18.9655	37.1724
5	Okada et al 2007	βIRKO (4/5 weeks old)	12	88.466	4.71701	9.24534	105.447	2.83021	5.54721	225.978	6.60382	12.9435	224.087	40.5663	79.51
		LIRKO (4/5 weeks old)	13	88.466	4.71701	9.24534	73.3716	11.3208	22.1888	225.978	6.60382	12.9435	273.144	9.43402	18.4907
		βIRKO-LIRKO (4/5 weeks old)	14	88.466	4.71701	9.24534	224.316	11.3208	22.1888	225.978	6.60382	12.9435	441.07	46.2267	90.6044
		βIRKO (chow 20 weeks old)	15	89.8477	4.44162	8.70558	92.3858	3.17259	6.21827	202.792	17.7665	34.8223	346.193	20.3046	39.797
		βIRKO (HFD 20 weeks old)	16	128.553	20.9391	41.0406	205.33	13.9594	27.3604	370.939	24.7462	48.5025	478.173	24.1117	47.2589
6	Haas et al 2012	LIRKO	17	79.3492	3.08317	6.04302	64.676	7.72237	15.1358	198.423	21.2141	41.5795	216.945	19.2899	37.8082
7	Cohen et al 2004	LIRKO	18	111.951	3.95122	7.74439	120.9	14.8765	29.1578	284.488	12.5122	24.5239	411.779	24.4399	47.9022
8	Otani et al	βIRKO-ND	19	124.829	6.75	13.23	119.205	13.5	26.46	290.762	21.375	41.895	305.395	7.86757	15.4204
		βIRKO-D	20	124.829	6.75	13.23	256.452	40.5	79.38	290.762	21.375	41.895	566.387	63	123.48
9	Blueher et al 2002	FIRKO (2 months old)	21	64.6079	5.06297	9.92342	53.4694	3.79723	7.44256	186.633	8.10075	15.8775	169.415	3.03778	5.95405
		FIRKO (10 months old)	22	80.9588	5.28733	10.3632	59.7989	3.77818	7.40523	219.744	8.31517	16.2977	170.38	1.00751	1.97473
10	Guerra et al 2001	BATIRKO (male, 3 months old)	23	83.6336	3.48427	6.82917	79.4414	4.18113	8.19501	179.331	4.18113	8.19501	219.738	18.1182	35.5117
		BATIRKO (male, 6 months old)	24	87.3134	3.25725	6.38421	182.435	18.2406	35.7516	214.123	14.9834	29.3674	319.648	9.1203	17.8758
		BATIRKO (male, 12 months old)	25	97.8124	3.76184	7.37321	180.568	8.15065	15.9753	211.49	5.64276	11.0598	348.175	16.3013	31.9506
		BATIRKO (female, 3 months old)	26	90.0715	0	0	112.572	3.97351	7.78808	169.074	7.94702	15.5762	216.782	11.2583	22.0662
		BATIRKO (female, 6 months old)	27	96.389	0	0	144.586	13.8553	27.1563	165.862	6.02403	11.8071	262.251	27.1081	53.1319
		BATIRKO (female, 12 months old)	28	96.6449	0	0	121.102	6.11589	11.9871	166.359	5.5043	10.7884	275.215	26.9099	52.7434
11	Lauro et al 1998	Ins R	29	124.465	9.78593	19.1804	163.609	15.2905	29.9694	263.914	17.1254	33.5657	320.183	23.2416	45.5535
		Ins R-K1030 mutant	30	124.465	9.78593	19.1804	122.535	19.9597	39.1209	263.914	17.1254	33.5657	281.52	17.1746	33.6622
12	Bruening et al 1998	MIRKO	31	52.9826	5.43467	10.6519	63.8519	4.076	7.98896	197.691	19.7007	38.6133	198.365	13.9263	27.2956
13	Wojtaszewski et al 1999	MIRKO	32	96.6894	3.46411	6.78966	73.1334	5.88899	11.5424	231.544	12.8252	25.1373	259.965	16.6277	32.5904
14	Micheal et al 2000	LIRKO (2 months old)	33	109.971	7.33138	14.3695	131.965	10.2639	20.1173	294.721	11.7302	22.9912	319.648	31.5249	61.7889
		LIRKO (6 months old)	34	112.069	9.23645	18.1034	100.985	12.931	25.3448	291.872	12.931	25.3448	302.956	32.6355	63.9655
15	Mauvais-Jarvis et al 2000	βIRKO(2 months old)	35	64.0294	5.91354	11.5905	59.7434	0	0	164.571	3.76316	7.3758	256.77	1.61278	3.16106
		βIRKO(6 months old)	36	83.0582	6.31049	12.3686	107.335	6.31049	12.3686	226.992	7.28133	14.2714	352.237	17.4752	34.2514
		MIRKO(2 months old)	37	64.0294	5.91354	11.5905	61.879	2.15038	4.21474	164.571	3.76316	7.3758	212.68	15.0526	29.5032
		MIRKO(6 months old)	38	83.0582	6.31049	12.3686	74.3267	0	0	226.992	7.28133	14.2714	246.403	11.1647	21.8828
		βIRKO-MIRKO (2 months old)	39	64.0294	5.91354	11.5905	51.1271	0	0	164.571	3.76316	7.3758	244.935	4.30076	8.42948
		βIRKO-MIRKO (6 months old)	40	83.0582	6.31049	12.3686	75.2853	6.31355	12.3746	226.992	7.28133	14.2714	281.353	17.9637	35.2088
60 minutes	Reference	Kind of IRKO	Sr.no	0 minutes/fasting						60 minutes/fed
				Control			IRKO			Control			IRKO
				mean	SEM	95% CI	mean	SEM	95% CI	mean	SEM	95% CI	mean	SEM	95% CI
1	Sakaguchi et al 2017	inducible DO IR and IGF-R	1	149.837	10.5611	20.6997	230.365	14.5215	28.462	193.401	13.2013	25.8746	421.122	25.0825	49.1617
2	Kawamori et al 2009	αIRKO (2 months old)	2	78.3232	0	0	61.6545	3.16539	6.20417	141.814	0	0	248.157	49.2034	96.4386
		αIRKO (5 months old)	3	78.2924	0	0	78.2924	0	0	183.583	0	0	252.116	26.7921	52.5125
3	Escribano et al 2009	LIRKO (2 months old)	4	75.5674	3.00344	5.88674	85.9527	5.49998	10.78	167.84	13.566	26.5893	242.75	19.4999	38.2199
		LIRKO (4 months old)	5	80.4026	9.65867	18.931	93.6807	16.9013	33.1266	167.799	12.0686	23.6545	265.995	27.7665	54.4223
		LIRKO (6 months old)	6	115.625	15.2344	29.8594	105.469	12.8906	25.2656	191.406	22.2656	43.6406	329.77	3.20738	6.28646
		LIRKO (12 months old)	7	129.491	14.485	28.3906	95.693	10.6223	20.8197	127.95	20.7608	40.6913	329.77	42.0064	82.3326
4	Ealey et al 2008	MIRKO (7 weeks old)	8	95.092	12.2699	24.0491	91.2577	5.3681	10.5215	419.709	37.5668	73.631	363.717	22.2393	43.589
		MIRKO (16 weeks old)	9	73.9796	2.50787	4.91542	87.7705	12.5393	24.5771	356.651	31.9753	62.6716	381.715	38.8817	76.2082
		MIRKO (24 weeks old)	10	92.5034	11.2504	22.0508	98.7463	11.2504	22.0508	366.436	25.6259	50.2268	378.943	26.251	51.4519
		MIRKO (40 weeks old)	11	82.7586	9.1954	18.023	72.4138	12.069	23.6552	225.287	20.1149	39.4253	350.575	24.1379	47.3103
5	Okada et al 2007	βIRKO	12	88.466	4.71701	9.24534	105.447	2.83021	5.54721	231.393	13.2076	25.887	331.402	30.1889	59.1702
		LIRKO	13	88.466	4.71701	9.24534	73.3716	11.3208	22.1888	231.393	13.2076	25.887	380.451	23.5851	46.2267
		βIRKO-LIRKO	14	88.466	4.71701	9.24534	224.316	11.3208	22.1888	231.393	13.2076	25.887	555.928	76.4156	149.775
		βIRKO (chow)	15	89.8477	4.44162	8.70558	92.3858	3.17259	6.21827	206.599	20.3046	39.797	407.107	36.1675	70.8883
		βIRKO (HFD)	16	128.553	20.9391	41.0406	205.33	13.9594	27.3604	324.619	17.7665	34.8223	578.426	22.2081	43.5279
6	Haas et al 2012	LIRKO	17	79.3492	3.08317	6.04302	64.676	7.72237	15.1358	139.529	14.6603	28.7342	166.533	10.8023	21.1726
7	Cohen et al 2004	LIRKO	18	111.951	3.95122	7.74439	120.9	14.8765	29.1578	285.805	8.56098	16.7795	507.122	21.2521	41.6541
8	Otani et al	βIRKO-ND	19	124.829	6.75	13.23	119.205	13.5	26.46	233.952	16.875	33.075	232.827	18	35.28
		βIRKO-D	20	124.829	6.75	13.23	256.452	40.5	79.38	233.952	16.875	33.075	550.08	33.75	66.15
9	Blueher et al 2002	FIRKO (2 months old)	21	64.6079	5.06297	9.92342	53.4694	3.79723	7.44256	160.811	3.79723	7.44256	150.685	6.32871	12.4043
		FIRKO (10 months old)	22	80.9588	5.28733	10.3632	59.7989	3.77818	7.40523	191.787	4.78569	9.37996	125.292	5.28945	10.3673
10	Guerra et al 2001	BATIRKO (male, 3 months old)	23	83.6336	3.48427	6.82917	79.4414	4.18113	8.19501	150.983	4.87798	9.56084	177.469	11.8465	23.2192
		BATIRKO (male, 6 months old)	24	87.3134	3.25725	6.38421	182.435	18.2406	35.7516	179.382	4.56015	8.9379	277.09	15.6348	30.6442
		BATIRKO (male, 12 months old)	25	97.8124	3.76184	7.37321	180.568	8.15065	15.9753	175.962	6.89671	13.5175	278.785	52.0388	101.996
		BATIRKO (female, 3 months old)	26	90.0715	0	0	112.572	3.97351	7.78808	108.609	0	0	165.999	13.245	25.9603
		BATIRKO (female, 6 months old)	27	96.389	0	0	144.586	13.8553	27.1563	124.492	7.83349	15.3536	173.894	15.6625	30.6984
		BATIRKO (female, 12 months old)	28	96.6449	0	0	121.102	6.11589	11.9871	124.778	3.66953	7.19229	195.715	6.11589	11.9871
11	Lauro et al 1998	Ins R	29	124.465	9.78593	19.1804	163.609	15.2905	29.9694	239.45	14.6789	28.7706	284.709	23.8532	46.7523
		Ins R-K1030 mutant	30	124.465	9.78593	19.1804	122.535	19.9597	39.1209	239.45	14.6789	28.7706	251.123	19.4922	38.2048
12	Bruening et al 1998	MIRKO	31	52.9826	5.43467	10.6519	63.8519	4.076	7.98896	143.334	15.9643	31.2901	174.594	15.6247	30.6243
13	Wojtaszewski et al 1999	MIRKO	32	96.6894	3.46411	6.78966	73.1334	5.88899	11.5424	200.148	16.9741	33.2693	261.109	18.7082	36.668
14	Micheal et al 2000	LIRKO (2 months old)	33	109.971	7.33138	14.3695	131.965	10.2639	20.1173	299.12	18.3284	35.9238	401.76	24.9267	48.8563
		LIRKO (6 months old)	34	112.069	9.23645	18.1034	100.985	12.931	25.3448	278.325	5.54187	10.8621	293.103	30.1724	59.1379
15	Mauvais-Jarvis et al 2000	βIRKO(2 months old)	35	64.0294	5.91354	11.5905	59.7434	0	0	191.183	11.8271	23.1811	241.977	12.9134	25.3102
		βIRKO(6 months old)	36	83.0582	6.31049	12.3686	107.335	6.31049	12.3686	214.608	12.1356	23.7857	348.578	20.3877	39.9599
		MIRKO(2 months old)	37	64.0294	5.91354	11.5905	61.879	2.15038	4.21474	191.183	11.8271	23.1811	192.526	13.4399	26.3421
		MIRKO(6 months old)	38	83.0582	6.31049	12.3686	74.3267	0	0	214.608	12.1356	23.7857	238.873	12.621	24.7371
		βIRKO-MIRKO (2 months old)	39	64.0294	5.91354	11.5905	51.1271	0	0	191.183	11.8271	23.1811	252.744	11.8271	23.1811
		βIRKO-MIRKO (6 months old)	40	83.0582	6.31049	12.3686	75.2853	6.31355	12.3746	214.608	12.1356	23.7857	291.304	17.9576	35.1968
90 minutes	Reference	Kind of IRKO		0 minutes/fasting						90 minutes/fed
				Control			IRKO			Control			IRKO
			Sr. no.	mean	SEM	95% CI	mean	SEM	95% CI	mean	SEM	95% CI	mean	SEM	95% CI
1	Escribano et al 2009	LIRKO (2 months old)	1	75.5674	3.00344	5.88674	85.9527	5.49998	10.78	140.103	16.081	31.5187	180.649	19.4999	38.2199
		LIRKO (4 months old)	2	80.4026	9.65867	18.931	93.6807	16.9013	33.1266	140.275	8.44841	16.5589	203.055	29.7786	58.366
		LIRKO (6 months old)	3	115.625	15.2344	29.8594	105.469	12.8906	25.2656	169.531	16.4062	32.1562	259.468	0.297327	0.582762
		LIRKO (12 months old)	4	129.491	14.485	28.3906	95.693	10.6223	20.8197	114.139	17.8658	35.0169	259.468	35.7306	70.0319
2	Ealey et al 2008	MIRKO (7 weeks old)	5	95.092	12.2699	24.0491	91.2577	5.3681	10.5215	301.045	23.773	46.5951	258.872	29.908	58.6196
		MIRKO (16 weeks old)	6	73.9796	2.50787	4.91542	87.7705	12.5393	24.5771	237.439	31.3483	61.4428	260.642	39.4989	77.4179
		MIRKO (24 weeks old)	7	92.5034	11.2504	22.0508	98.7463	11.2504	22.0508	298.491	64.3773	126.18	261.622	20.6258	40.4265
		MIRKO (40 weeks old)	8	82.7586	9.1954	18.023	72.4138	12.069	23.6552	167.816	20.6897	40.5517	241.379	28.7356	56.3218
3	Okada et al 2007	βIRKO	9	88.466	4.71701	9.24534	105.447	2.83021	5.54721	202.626	7.54722	14.7926	278.094	19.8115	38.8304
		LIRKO	10	88.466	4.71701	9.24534	73.3716	11.3208	22.1888	202.626	7.54722	14.7926	461.114	33.9625	66.5665
		βIRKO-LIRKO	11	88.466	4.71701	9.24534	224.316	11.3208	22.1888	202.626	7.54722	14.7926	649.79	55.6627	109.099
		βIRKO (chow)	12	89.8477	4.44162	8.70558	92.3858	3.17259	6.21827	178.68	9.51777	18.6548	437.563	31.7259	62.1827
		βIRKO (HFD)	13	128.553	20.9391	41.0406	205.33	13.9594	27.3604	313.198	31.0914	60.9391	577.157	26.0152	50.9898
4	Haas et al 2012	LIRKO	14	79.3492	3.08317	6.04302	64.676	7.72237	15.1358	106.872	8.87334	17.3918	123.837	14.2745	27.978
5	Cohen et al 2004	LIRKO	15	111.951	3.95122	7.74439	120.9	14.8765	29.1578	193.61	11.8537	23.2332	527.808	20.1895	39.5714
6	Lauro et al 1998	Ins R	16	124.465	9.78593	19.1804	163.609	15.2905	29.9694	208.869	12.2324	23.9755	260.245	17.737	34.7645
		Ins R-K1030 mutant	17	124.465	9.78593	19.1804	122.535	19.9597	39.1209	208.869	12.2324	23.9755	240.21	15.7821	30.9328
7	Wojtaszewski et al 1999	MIRKO	18	96.6894	3.46411	6.78966	73.1334	5.88899	11.5424	149.33	18.3657	35.9969	213.766	20.0938	39.3839
8	Micheal et al 2000	LIRKO (2 months old)	19	109.971	7.33138	14.3695	131.965	10.2639	20.1173	224.34	16.8622	33.0499	413.49	22.7273	44.5455
		LIRKO (6 months old)	20	112.069	9.23645	18.1034	100.985	12.931	25.3448	242.611	7.38916	14.4828	258.621	22.7833	44.6552
120 minutes	Reference	Kind of IRKO	Sr. no.	0 minutes/fasting						120 minutes/fed
				Control			IRKO			Control			IRKO
				mean	SEM	95% CI	mean	SEM	95% CI	mean	SEM	95% CI	mean	SEM	95% CI
1	Sakaguchi et al 2017	inducible DO IR and IGF-R	1	149.837	10.5611	20.6997	230.365	14.5215	28.462	152.483	13.8614	27.1683	252.811	35.6436	69.8614
		BAT-IRKO	2	140.2	9.299	18.226	236.052	25.7511	50.4721	163.09	2.86123	5.60801	464.95	27.897	54.6781
2	Softic et al	FIRKO (12 weeks)	3	88.1748	0	0	154.756	12.5964	24.6889	133.162	5.39846	10.581	518.252	21.5938	42.3239
		FIRKO (52 weeks)	4	92.2897	2.33645	4.57944	123.832	10.514	20.6075	136.682	3.50467	6.86916	189.252	17.5234	34.3458
3	Kawamori et al 2009	αIRKO (2 months old)	5	78.3232	0	0	61.6545	3.16539	6.20417	85.4807	0	0	110.858	3.97102	7.7832
		αIRKO (5 months old)	6	78.2924	0	0	78.2924	0	0	114.428	0	0	192.307	28.6594	56.1724
		αIRKO (2 months old)	7	77.8243	18.41	36.0837	116.318	20.0837	39.364	105.618	25.4682	49.9176	191.011	15.7303	30.8315
		αIRKO (5 months old)	8	114.644	25.9414	50.8452	115.481	21.7573	42.6444	134.831	28.4644	55.7903	173.034	30.7116	60.1948
		αIRKO (12 months old)	9	147.28	31.7992	62.3264	123.013	20.0837	39.364	135.581	13.4831	26.427	197.004	32.9588	64.5993
4	Escribano et al 2009	LIRKO (2 months old)	10	75.5674	3.00344	5.88674	85.9527	5.49998	10.78	146.55	16.5	32.3399	121.396	7.02838	13.7756
		LIRKO (4 months old)	11	80.4026	9.65867	18.931	93.6807	16.9013	33.1266	118.388	7.64585	14.9859	161.044	27.3641	53.6336
		LIRKO (6 months old)	12	115.625	15.2344	29.8594	105.469	12.8906	25.2656	150.781	13.2812	26.0312	187.5	25.3906	49.7656
		LIRKO (12 months old)	13	129.491	14.485	28.3906	95.693	10.6223	20.8197	117.231	18.8305	36.9077	202.692	19.3133	37.8541
5	Ealey et al 2008	MIRKO (7 weeks old)	14	95.092	12.2699	24.0491	91.2577	5.3681	10.5215	227.876	34.5092	67.638	148.136	7.67859	15.05
		MIRKO (16 weeks old)	15	73.9796	2.50787	4.91542	87.7705	12.5393	24.5771	106.224	3.13483	6.14428	135.067	5.64515	11.0645
		MIRKO (24 weeks old)	16	92.5034	11.2504	22.0508	98.7463	11.2504	22.0508	215.098	44.3766	86.9782	156.345	3.75014	7.35027
		MIRKO (40 weeks old)	17	82.7586	9.1954	18.023	72.4138	12.069	23.6552	119.54	3.44828	6.75862	120.69	9.1954	18.023
6	Okada et al 2007	βIRKO	18	88.466	4.71701	9.24534	105.447	2.83021	5.54721	99.7908	16.9812	33.2832	209.241	2.83021	5.54721
		LIRKO	19	88.466	4.71701	9.24534	73.3716	11.3208	22.1888	99.7908	16.9812	33.2832	350.732	16.9812	33.2832
		βIRKO-LIRKO	20	88.466	4.71701	9.24534	224.316	11.3208	22.1888	99.7908	16.9812	33.2832	592.251	40.5663	79.51
		βIRKO (chow)	21	89.8477	4.44162	8.70558	92.3858	3.17259	6.21827	132.995	18.401	36.066	304.949	46.3198	90.7868
		βIRKO (HFD)	22	128.553	20.9391	41.0406	205.33	13.9594	27.3604	263.706	24.7462	48.5025	443.909	29.1878	57.2081
7	Haas et al 2012	LIRKO	23	79.3492	3.08317	6.04302	64.676	7.72237	15.1358	92.7197	12.3455	24.1972	110.457	20.0679	39.3331
8	Cohen et al 2004	LIRKO	24	111.951	3.95122	7.74439	120.9	14.8765	29.1578	119.854	7.2439	14.198	316.291	26.5605	52.0586
9	Otani et al	βIRKO-ND	25	124.829	6.75	13.23	119.205	13.5	26.46	142.83	16.875	33.075	143.955	18	35.28
		βIRKO-D	26	124.829	6.75	13.23	256.452	40.5	79.38	142.83	16.875	33.075	431.959	39.3713	77.1677
10	Blueher et al 2002	FIRKO (2 months old)	27	64.6079	5.06297	9.92342	53.4694	3.79723	7.44256	82.8346	3.0399	5.95821	71.6918	3.79723	7.44256
		FIRKO (10 months old)	28	80.9588	5.28733	10.3632	59.7989	3.77818	7.40523	144.432	3.27442	6.41786	67.3574	4.03006	7.89891
11	Guerra et al 2001	BATIRKO (male, 3 months old)	29	83.6336	3.48427	6.82917	79.4414	4.18113	8.19501	117.06	3.48427	6.82917	119.848	11.1497	21.8534
		BATIRKO (male, 6 months old)	30	87.3134	3.25725	6.38421	182.435	18.2406	35.7516	126.391	6.5145	12.7684	183.718	5.2116	10.2147
		BATIRKO (male, 12 months old)	31	97.8124	3.76184	7.37321	180.568	8.15065	15.9753	122.882	8.15065	15.9753	210.659	24.452	47.9258
		BATIRKO (female, 3 months old)	32	90.0715	0	0	112.572	3.97351	7.78808	151.43	1.98675	3.89404	123.179	3.97351	7.78808
		BATIRKO (female, 6 months old)	33	96.389	0	0	144.586	13.8553	27.1563	99.9989	0	0	122.886	10.2408	20.0721
		BATIRKO (female, 12 months old)	34	96.6449	0	0	121.102	6.11589	11.9871	100.308	3.05794	5.99357	113.756	10.397	20.3781
12	Lauro et al 1998	Ins R	35	124.465	9.78593	19.1804	163.609	15.2905	29.9694	202.752	13.4557	26.3731	212.538	21.4067	41.9572
		Ins R-K1030 mutant	36	124.465	9.78593	19.1804	122.535	19.9597	39.1209	202.752	13.4557	26.3731	248.801	14.3895	28.2035
13	Bruening et al 1998	MIRKO	37	52.9826	5.43467	10.6519	63.8519	4.076	7.98896	118.883	12.9073	25.2984	114.818	9.51066	18.6409
14	Wojtaszewski et al 1999	MIRKO	38	96.6894	3.46411	6.78966	73.1334	5.88899	11.5424	113.766	14.8996	29.2033	159.496	20.7847	40.738
15	Micheal et al 2000	LIRKO (2 months old)	39	109.971	7.33138	14.3695	131.965	10.2639	20.1173	101.173	4.39883	8.6217	313.783	23.4604	45.9824
		LIRKO (6 months old)	40	112.069	9.23645	18.1034	100.985	12.931	25.3448	174.877	5.54187	10.8621	165.025	19.0887	37.4138
16	Mauvais-Jarvis et al 2000	βIRKO(2 months old)	41	64.0294	5.91354	11.5905	59.7434	0	0	110.255	2.14667	4.20747	152.202	1.07519	2.10737
		βIRKO(6 months old)	42	83.0582	6.31049	12.3686	107.335	6.31049	12.3686	175.282	7.76675	15.2228	284.029	22.3294	43.7657
		MIRKO(2 months old)	43	64.0294	5.91354	11.5905	61.879	2.15038	4.21474	110.255	2.14667	4.20747	115.638	0	0
		MIRKO(6 months old)	44	83.0582	6.31049	12.3686	74.3267	0	0	175.282	7.76675	15.2228	164.603	0	0
		βIRKO-MIRKO (2 months old)	45	64.0294	5.91354	11.5905	51.1271	0	0	110.255	2.14667	4.20747	152.187	9.14652	17.9272
		βIRKO-MIRKO (6 months old)	46	83.0582	6.31049	12.3686	75.2853	6.31355	12.3746	175.282	7.76675	15.2228	216.052	14.0803	27.5974

## Sheet: Fasting_all
Duration of fasting	Source paper	Kind of IRKO		Sr. no.	0 minutes/fasting
					Control		IRKO		Control			IRKO
					mean	95% CI	mean	95% CI	Control 0-CI	Control 0	Control 0+CI	(IRKO-Control)-CI	IRKO-Control	(IRKO-control)+CI
6 hours	Sakaguchi et al 2017	inducible DO IR and IGF-R	1	1	149.837	20.6997	230.365	28.462	-20.6997	0	20.6997	52.066	80.5281	108.99
		BAT-IRKO	2	2	140.2	18.226	236.052	50.4721	-18.226	0	18.226	45.3791	95.8512	146.323
ON	Softic et al 2016	FIRKO (12 weeks)	3	3	88.1748	0	154.756	24.6889	0	0	0	41.892	66.581	91.2699
		FIRKO (52 weeks)	4	4	92.2897	4.57944	123.832	20.6075	-4.57944	0	4.57944	10.9346	31.5421	52.1495
16 hours	Kawamori et al 2009	αIRKO (2 months old)	1	5	78.3232	0	61.6545	6.20417	0	0	0	-22.8728	-16.6687	-10.4645
		αIRKO (5 months old)	2	6	78.2924	0	78.2924	0	0	0	0	0	0	0
		αIRKO (2 months old)	3	7	77.8243	36.0837	116.318	39.364	-36.0837	0	36.0837	-0.870293	38.4937	77.8577
		αIRKO (5 months old)	4	8	114.644	50.8452	115.481	42.6444	-50.8452	0	50.8452	-41.8075	0.83682	43.4812
		αIRKO (12 months old)	5	9	147.28	62.3264	123.013	39.364	-62.3264	0	62.3264	-63.6318	-24.2678	15.0962
16 hours	Escribano et al 2009	LIRKO (2 months old)	1	10	75.5674	5.88674	85.9527	10.78	-5.88674	0	5.88674	-0.394681	10.3853	21.1653
		LIRKO (4 months old)	2	11	80.4026	18.931	93.6807	33.1266	-18.931	0	18.931	-19.8485	13.2781	46.4048
		LIRKO (6 months old)	3	12	115.625	29.8594	105.469	25.2656	-29.8594	0	29.8594	-35.4219	-10.1562	15.1094
		LIRKO (12 months old)	4	13	129.491	28.3906	95.693	20.8197	-28.3906	0	28.3906	-54.618	-33.7983	-12.9785
ON	Ealey et al 2008	MIRKO (7 weeks old)	1	14	95.092	24.0491	91.2577	10.5215	-24.0491	0	24.0491	-14.3558	-3.83436	6.68712
		MIRKO (16 weeks old)	2	15	73.9796	4.91542	87.7705	24.5771	-4.91542	0	4.91542	-10.7863	13.7908	38.3679
		MIRKO (24 weeks old)	3	16	92.5034	22.0508	98.7463	22.0508	-22.0508	0	22.0508	-15.8079	6.24295	28.2937
		MIRKO (40 weeks old)	4	17	82.7586	18.023	72.4138	23.6552	-18.023	0	18.023	-34	-10.3448	13.3103
ON	Okada et al 2007	βIRKO	1	18	88.466	9.24534	105.447	5.54721	-9.24534	0	9.24534	11.434	16.9812	22.5285
		LIRKO	5	19	88.466	9.24534	73.3716	22.1888	-9.24534	0	9.24534	-37.2833	-15.0944	7.09439
		βIRKO-LIRKO	2	20	88.466	9.24534	224.316	22.1888	-9.24534	0	9.24534	113.661	135.85	158.039
		βIRKO (chow)	3	21	89.8477	8.70558	92.3858	6.21827	-8.70558	0	8.70558	-3.6802	2.53807	8.75635
		βIRKO (HFD)	4	22	128.553	41.0406	205.33	27.3604	-41.0406	0	41.0406	49.4162	76.7766	104.137
ON	Haas et al 2012	LIRKO	6	23	79.3492	6.04302	64.676	15.1358	-6.04302	0	6.04302	-29.809	-14.6731	0.4627
16 hours	Cohen et al 2004	LIRKO	7	24	111.951	7.74439	120.9	29.1578	-7.74439	0	7.74439	-20.2094	8.94845	38.1063
4 hours	Otani et al 2004	βIRKO-ND	5	25	124.829	13.23	119.205	26.46	-13.23	0	13.23	-32.0831	-5.62314	20.8369
		βIRKO-D	6	26	124.829	13.23	256.452	79.38	-13.23	0	13.23	52.2431	131.623	211.003
16 hours	Blueher et al 2002	FIRKO (2 months old)	5	27	64.6079	9.92342	53.4694	7.44256	-9.92342	0	9.92342	-18.5811	-11.1385	-3.69597
		FIRKO (10 months old)	6	28	80.9588	10.3632	59.7989	7.40523	-10.3632	0	10.3632	-28.5651	-21.1599	-13.7547
ON	Guerra et al 2001	BATIRKO (male, 3 months old)	7	29	83.6336	6.82917	79.4414	8.19501	-6.82917	0	6.82917	-12.3872	-4.19221	4.0028
		BATIRKO (male, 6 months old)	8	30	87.3134	6.38421	182.435	35.7516	-6.38421	0	6.38421	59.3697	95.1213	130.873
		BATIRKO (male, 12 months old)	9	31	97.8124	7.37321	180.568	15.9753	-7.37321	0	7.37321	66.7807	82.756	98.7313
		BATIRKO (female, 3 months old)	10	32	90.0715	0	112.572	7.78808	0	0	0	14.7128	22.5009	30.289
		BATIRKO (female, 6 months old)	11	33	96.389	0	144.586	27.1563	0	0	0	21.0404	48.1967	75.3531
		BATIRKO (female, 12 months old)	12	34	96.6449	0	121.102	11.9871	0	0	0	12.4695	24.4566	36.4437
ON	Lauro et al 1998	Ins R	1	35	124.465	19.1804	163.609	29.9694	-19.1804	0	19.1804	9.17431	39.1437	69.1131
		Ins R-K1030 mutant	2	36	124.465	19.1804	122.535	39.1209	-19.1804	0	19.1804	-41.0511	-1.93013	37.1908
ON	Bruening et al 1998	MIRKO	5	37	52.9826	10.6519	63.8519	7.98896	-10.6519	0	10.6519	2.88037	10.8693	18.8583
ON	Wojtaszewski et al 1999	MIRKO	6	38	96.6894	6.78966	73.1334	11.5424	-6.78966	0	6.78966	-35.0984	-23.556	-12.0135
16 hours	Micheal et al 2000	LIRKO (2 months old)	8	39	109.971	14.3695	131.965	20.1173	-14.3695	0	14.3695	1.87683	21.9941	42.1114
		LIRKO (6 months old)	9	40	112.069	18.1034	100.985	25.3448	-18.1034	0	18.1034	-36.4286	-11.0837	14.2611
ON	Mauvais Jarvis et al 2000	βIRKO(2 months old)	7	41	64.0294	11.5905	59.7434	0	-11.5905	0	11.5905	-4.28593	-4.28593	-4.28593
		βIRKO(6 months old)	8	42	83.0582	12.3686	107.335	12.3686	-12.3686	0	12.3686	11.9087	24.2772	36.6458
		MIRKO(2 months old)	7	43	64.0294	11.5905	61.879	4.21474	-11.5905	0	11.5905	-6.36512	-2.15038	2.06436
		MIRKO(6 months old)	8	44	83.0582	12.3686	74.3267	0	-12.3686	0	12.3686	-8.73148	-8.73148	-8.73148
		βIRKO-MIRKO (2 months old)	9,9	45	64.0294	11.5905	51.1271	0	-11.5905	0	11.5905	-12.9023	-12.9023	-12.9023
		βIRKO+C4:D49-MIRKO (6 months old)	10,10	46	83.0582	12.3686	75.2853	12.3746	-12.3686	0	12.3686	-20.1474	-7.77287	4.60168
											Control	IRKO
		1		-20.6997	0	20.6997	52.066	80.5281	108.99		-20.6997	52.066	1	6 hours	FIRKO
		2		-18.226	0	18.226	45.3791	95.8512	146.323		0	80.5281	1
		3		0	0	0	41.892	66.581	91.2699		20.6997	108.99	1
		4		-4.57944	0	4.57944	10.9346	31.5421	52.1495
		5		0	0	0	-22.8728	-16.6687	-10.4645		-18.226	45.3791	2	6 hours	FIRKO
		6		0	0	0	0	0	0		0	95.8512	2
		7		-36.0837	0	36.0837	-0.870293	38.4937	77.8577		18.226	146.323	2
		8		-50.8452	0	50.8452	-41.8075	0.83682	43.4812
		9		-62.3264	0	62.3264	-63.6318	-24.2678	15.0962		0	41.892	3	ON	FIRKO
		10		-5.88674	0	5.88674	-0.394681	10.3853	21.1653		0	66.581	3
		11		-18.931	0	18.931	-19.8485	13.2781	46.4048		0	91.2699	3
		12		-29.8594	0	29.8594	-35.4219	-10.1562	15.1094
		13		-28.3906	0	28.3906	-54.618	-33.7983	-12.9785		-4.57944	10.9346	4	ON	FIRKO
		14		-24.0491	0	24.0491	-14.3558	-3.83436	6.68712		0	31.5421	4
		15		-4.91542	0	4.91542	-10.7863	13.7908	38.3679		4.57944	52.1495	4
		16		-22.0508	0	22.0508	-15.8079	6.24295	28.2937
		17		-18.023	0	18.023	-34	-10.3448	13.3103		0	-22.8728	5	16 hours	αIRKO
		18		-9.24534	0	9.24534	11.434	16.9812	22.5285		0	-16.6687	5
		19		-9.24534	0	9.24534	-37.2833	-15.0944	7.09439		0	-10.4645	5
		20		-9.24534	0	9.24534	113.661	135.85	158.039
		21		-8.70558	0	8.70558	-3.6802	2.53807	8.75635		0	0	6	16 hours	αIRKO
		22		-41.0406	0	41.0406	49.4162	76.7766	104.137		0	0	6
		23		-6.04302	0	6.04302	-29.809	-14.6731	0.4627		0	0	6
		24		-7.74439	0	7.74439	-20.2094	8.94845	38.1063
		25		-13.23	0	13.23	-32.0831	-5.62314	20.8369		-36.0837	-0.870293	7	16 hours	αIRKO
		26		-13.23	0	13.23	52.2431	131.623	211.003		0	38.4937	7
		27		-9.92342	0	9.92342	-18.5811	-11.1385	-3.69597		36.0837	77.8577	7
		28		-10.3632	0	10.3632	-28.5651	-21.1599	-13.7547
		29		-6.82917	0	6.82917	-12.3872	-4.19221	4.0028		-50.8452	-41.8075	8	16 hours	αIRKO
		30		-6.38421	0	6.38421	59.3697	95.1213	130.873		0	0.83682	8
		31		-7.37321	0	7.37321	66.7807	82.756	98.7313		50.8452	43.4812	8
		32		0	0	0	14.7128	22.5009	30.289
		33		0	0	0	21.0404	48.1967	75.3531		-62.3264	-63.6318	9	16 hours	αIRKO
		34		0	0	0	12.4695	24.4566	36.4437		0	-24.2678	9
		35		-19.1804	0	19.1804	9.17431	39.1437	69.1131		62.3264	15.0962	9
		36		-19.1804	0	19.1804	-41.0511	-1.93013	37.1908
		37		-10.6519	0	10.6519	2.88037	10.8693	18.8583		-5.88674	-0.394681	10	16 hours	LIRKO
		38		-6.78966	0	6.78966	-35.0984	-23.556	-12.0135		0	10.3853	10
		39		-14.3695	0	14.3695	1.87683	21.9941	42.1114		5.88674	21.1653	10
		40		-18.1034	0	18.1034	-36.4286	-11.0837	14.2611
		41		-11.5905	0	11.5905	-4.28593	-4.28593	-4.28593		-18.931	-19.8485	11	16 hours	LIRKO
		42		-12.3686	0	12.3686	11.9087	24.2772	36.6458		0	13.2781	11
		43		-11.5905	0	11.5905	-6.36512	-2.15038	2.06436		18.931	46.4048	11
		44		-12.3686	0	12.3686	-8.73148	-8.73148	-8.73148
		45		-11.5905	0	11.5905	-12.9023	-12.9023	-12.9023		-29.8594	-35.4219	12	16 hours	LIRKO
		46		-12.3686	0	12.3686	-20.1474	-7.77287	4.60168		0	-10.1562	12
											29.8594	15.1094	12
											-28.3906	-54.618	13	16 hours	LIRKO
											0	-33.7983	13
											28.3906	-12.9785	13
											-24.0491	-14.3558	14	ON	MIRKO
											0	-3.83436	14
											24.0491	6.68712	14
											-4.91542	-10.7863	15	ON	MIRKO
											0	13.7908	15
											4.91542	38.3679	15
											-22.0508	-15.8079	16	ON	MIRKO
											0	6.24295	16
											22.0508	28.2937	16
											-18.023	-34	17	ON	MIRKO
											0	-10.3448	17
											18.023	13.3103	17
											-9.24534	11.434	18	ON	βIRKO
											0	16.9812	18
											9.24534	22.5285	18
											-9.24534	-37.2833	19	ON	LIRKO
											0	-15.0944	19
											9.24534	7.09439	19
											-9.24534	113.661	20	ON	βIRKO
											0	135.85	20
											9.24534	158.039	20
											-8.70558	-3.6802	21	ON	βIRKO
											0	2.53807	21
											8.70558	8.75635	21
											-41.0406	49.4162	22	ON	βIRKO
											0	76.7766	22
											41.0406	104.137	22
											-6.04302	-29.809	23	ON	LIRKO
											0	-14.6731	23
											6.04302	0.4627	23
											-7.74439	-20.2094	24	16 hours	LIRKO
											0	8.94845	24
											7.74439	38.1063	24
											-13.23	-32.0831	25	4 hours	βIRKO
											0	-5.62314	25
											13.23	20.8369	25
											-13.23	52.2431	26	4 hours	βIRKO
											0	131.623	26
											13.23	211.003	26
											-9.92342	-18.5811	27	16 hours	FIRKO
											0	-11.1385	27
											9.92342	-3.69597	27
											-10.3632	-28.5651	28	16 hours	FIRKO
											0	-21.1599	28
											10.3632	-13.7547	28
											-6.82917	-12.3872	29	ON	FIRKO
											0	-4.19221	29
											6.82917	4.0028	29
											-6.38421	59.3697	30	ON	FIRKO
											0	95.1213	30
											6.38421	130.873	30
											-7.37321	66.7807	31	ON	FIRKO
											0	82.756	31
											7.37321	98.7313	31
											0	14.7128	32	ON	FIRKO
											0	22.5009	32
											0	30.289	32
											0	21.0404	33	ON	FIRKO
											0	48.1967	33
											0	75.3531	33
											0	12.4695	34	ON	FIRKO
											0	24.4566	34
											0	36.4437	34
											-19.1804	9.17431	35	ON	Ins R
											0	39.1437	35
											19.1804	69.1131	35
											-19.1804	-41.0511	36	ON	Ins R K103R
											0	-1.93013	36
											19.1804	37.1908	36
											-10.6519	2.88037	37	ON	MIRKO
											0	10.8693	37
											10.6519	18.8583	37
											-6.78966	-35.0984	38	ON	MIRKO
											0	-23.556	38
											6.78966	-12.0135	38
											-14.3695	1.87683	39	16 hours	LIRKO
											0	21.9941	39
											14.3695	42.1114	39
											-18.1034	-36.4286	40	16 hours	LIRKO
											0	-11.0837	40
											18.1034	14.2611	40
											-11.5905	-4.28593	41	ON	βIRKO
											0	-4.28593	41
											11.5905	-4.28593	41
											-12.3686	11.9087	42	ON	βIRKO
											0	24.2772	42
											12.3686	36.6458	42
											-11.5905	-6.36512	43	ON	MIRKO
											0	-2.15038	43
											11.5905	2.06436	43
											-12.3686	-8.73148	44	ON	MIRKO
											0	-8.73148	44
											12.3686	-8.73148	44
											-11.5905	-12.9023	45	ON	βIRKO-MIRKO
											0	-12.9023	45
											11.5905	-12.9023	45
											-12.3686	-20.1474	46	ON	βIRKO-MIRKO
											0	-7.77287	46
											12.3686	4.60168	46
				Control					IRKO					only means compared
				mean	95% CI	upper bound	lower bound	mean	95% CI	upper bound	lower bound	IRKO > control	IRKO< Control	IRKO> Con	IRKO <Con
		1		149.837	20.6997	170.537	129.137	230.365	28.462	258.827	201.903	1	0	1	0	6 hours
		2		140.2	18.226	158.426	121.974	236.052	50.4721	286.524	185.579	1	0	1	0	6 hours
		3		88.1748	0	88.1748	88.1748	154.756	24.6889	179.445	130.067	1	0	1	0	ON
		4		92.2897	4.57944	96.8692	87.7103	123.832	20.6075	144.439	103.224	1	0	1	0	ON
		5		78.3232	0	78.3232	78.3232	61.6545	6.20417	67.8587	55.4504	0	1	0	1	16 hours
		6		78.2924	0	78.2924	78.2924	78.2924	0	78.2924	78.2924	0	0	0	0	16 hours
		7		77.8243	36.0837	113.908	41.7406	116.318	39.364	155.682	76.954	0	0	1	0	16 hours
		8		114.644	50.8452	165.49	63.7992	115.481	42.6444	158.126	72.8368	0	0	1	0	16 hours
		9		147.28	62.3264	209.607	84.954	123.013	39.364	162.377	83.6485	0	0	0	1	16 hours
		10		75.5674	5.88674	81.4541	69.6807	85.9527	10.78	96.7327	75.1727	0	0	1	0	16 hours
		11		80.4026	18.931	99.3335	61.4716	93.6807	33.1266	126.807	60.554	0	0	1	0	16 hours
		12		115.625	29.8594	145.484	85.7656	105.469	25.2656	130.734	80.2031	0	0	0	1	16 hours
		13		129.491	28.3906	157.882	101.101	95.693	20.8197	116.513	74.8733	0	0	0	1	16 hours
		14		95.092	24.0491	119.141	71.0429	91.2577	10.5215	101.779	80.7362	0	0	0	1	ON
		15		73.9796	4.91542	78.8951	69.0642	87.7705	24.5771	112.348	63.1934	0	0	1	0	ON
		16		92.5034	22.0508	114.554	70.4526	98.7463	22.0508	120.797	76.6955	0	0	1	0	ON
		17		82.7586	18.023	100.782	64.7356	72.4138	23.6552	96.069	48.7586	0	0	0	1	ON
		18		88.466	9.24534	97.7114	79.2207	105.447	5.54721	110.994	99.9001	1	0	1	0	ON
		19		88.466	9.24534	97.7114	79.2207	73.3716	22.1888	95.5604	51.1828	0	0	0	1	ON
		20		88.466	9.24534	97.7114	79.2207	224.316	22.1888	246.505	202.127	1	0	1	0	ON
		21		89.8477	8.70558	98.5533	81.1421	92.3858	6.21827	98.6041	86.1675	0	0	1	0	ON
		22		128.553	41.0406	169.594	87.5127	205.33	27.3604	232.69	177.97	1	0	1	0	ON
		23		79.3492	6.04302	85.3922	73.3061	64.676	15.1358	79.8119	49.5402	0	0	0	1	ON
		24		111.951	7.74439	119.696	104.207	120.9	29.1578	150.058	91.7418	0	0	1	0	16 hours
		25		124.829	13.23	138.059	111.599	119.205	26.46	145.665	92.7454	0	0	0	1	4 hours
		26		124.829	13.23	138.059	111.599	256.452	79.38	335.832	177.072	1	0	1	0	4 hours
		27		64.6079	9.92342	74.5314	54.6845	53.4694	7.44256	60.912	46.0268	0	0	0	1	16 hours
		28		80.9588	10.3632	91.322	70.5957	59.7989	7.40523	67.2041	52.3937	0	1	0	1	16 hours
		29		83.6336	6.82917	90.4628	76.8044	79.4414	8.19501	87.6364	71.2464	0	0	0	1	ON
		30		87.3134	6.38421	93.6976	80.9291	182.435	35.7516	218.186	146.683	1	0	1	0	ON
		31		97.8124	7.37321	105.186	90.4392	180.568	15.9753	196.544	164.593	1	0	1	0	ON
		32		90.0715	0	90.0715	90.0715	112.572	7.78808	120.36	104.784	1	0	1	0	ON
		33		96.389	0	96.389	96.389	144.586	27.1563	171.742	117.429	1	0	1	0	ON
		34		96.6449	0	96.6449	96.6449	121.102	11.9871	133.089	109.114	1	0	1	0	ON
		35		124.465	19.1804	143.645	105.284	163.609	29.9694	193.578	133.639	0	0	1	0	ON
		36		124.465	19.1804	143.645	105.284	122.535	39.1209	161.656	83.4138	0	0	0	1	ON
		37		52.9826	10.6519	63.6345	42.3307	63.8519	7.98896	71.8409	55.863	0	0	1	0	ON
		38		96.6894	6.78966	103.479	89.8997	73.1334	11.5424	84.6759	61.591	0	1	0	1	ON
		39		109.971	14.3695	124.34	95.6012	131.965	20.1173	152.082	111.848	0	0	1	0	16 hours
		40		112.069	18.1034	130.172	93.9655	100.985	25.3448	126.33	75.6404	0	0	0	1	16 hours
		41		64.0294	11.5905	75.6199	52.4388	59.7434	0	59.7434	59.7434	0	0	0	1	ON
		42		83.0582	12.3686	95.4267	70.6896	107.335	12.3686	119.704	94.9668	0	0	1	0	ON
		43		64.0294	11.5905	75.6199	52.4388	61.879	4.21474	66.0937	57.6642	0	0	0	1	ON
		44		83.0582	12.3686	95.4267	70.6896	74.3267	0	74.3267	74.3267	0	0	0	1	ON
		45		64.0294	11.5905	75.6199	52.4388	51.1271	0	51.1271	51.1271	0	1	0	1	ON
		46		83.0582	12.3686	95.4267	70.6896	75.2853	12.3746	87.6598	62.9107	0	0	0	1	ON
												13	4	25	20

## Sheet: Fasting duration
fasting duration
Control	IRKO						Control	IRKO									Control					IRKO					only means compared
-20.6997	52.066	1	6 hours	FIRKO	1		-13.23	-32.0831	25	4 hours	βIRKO	1					mean	95% CI	upper bound	lower bound	mean	95% CI	upper bound	lower bound	IRKO > control	IRKO< Control	IRKO> Con	IRKO <Con
0	80.5281	1					0	-5.62314	25				T<C		1		149.837	20.6997	170.537	129.137	230.365	28.462	258.827	201.903	1	0	1	0	6 hours
20.6997	108.99	1					13.23	20.8369	25						2		140.2	18.226	158.426	121.974	236.052	50.4721	286.524	185.579	1	0	1	0	6 hours
															3		88.1748	0	88.1748	88.1748	154.756	24.6889	179.445	130.067	1	0	1	0	ON
-18.226	45.3791	2	6 hours	FIRKO	2		-13.23	52.2431	26	4 hours	βIRKO	2	T>C		4		92.2897	4.57944	96.8692	87.7103	123.832	20.6075	144.439	103.224	1	0	1	0	ON			IRKO > control	IRKO< Control	IRKO> Con	IRKO <Con
0	95.8512	2					0	131.623	26						5		78.3232	0	78.3232	78.3232	61.6545	6.20417	67.8587	55.4504	0	1	0	1	16 hours		1	0	1	0	1	16 hours
18.226	146.323	2					13.23	211.003	26						6		78.2924	0	78.2924	78.2924	78.2924	0	78.2924	78.2924	0	0	0	0	16 hours		2	0	0	0	0	16 hours
															7		77.8243	36.0837	113.908	41.7406	116.318	39.364	155.682	76.954	0	0	1	0	16 hours		3	0	0	1	0	16 hours
0	41.892	3	ON	FIRKO	1		-20.6997	52.066	1	6 hours	FIRKO	1			8		114.644	50.8452	165.49	63.7992	115.481	42.6444	158.126	72.8368	0	0	1	0	16 hours		4	0	0	1	0	16 hours
0	66.581	3					0	80.5281	1				T>C		9		147.28	62.3264	209.607	84.954	123.013	39.364	162.377	83.6485	0	0	0	1	16 hours		5	0	0	0	1	16 hours
0	91.2699	3					20.6997	108.99	1						10		75.5674	5.88674	81.4541	69.6807	85.9527	10.78	96.7327	75.1727	0	0	1	0	16 hours		6	0	0	1	0	16 hours
															11		80.4026	18.931	99.3335	61.4716	93.6807	33.1266	126.807	60.554	0	0	1	0	16 hours		7	0	0	1	0	16 hours
-4.57944	10.9346	4	ON	FIRKO	2		-18.226	45.3791	2	6 hours	FIRKO	2			12		115.625	29.8594	145.484	85.7656	105.469	25.2656	130.734	80.2031	0	0	0	1	16 hours		8	0	0	0	1	16 hours
0	31.5421	4					0	95.8512	2				T>C		13		129.491	28.3906	157.882	101.101	95.693	20.8197	116.513	74.8733	0	0	0	1	16 hours		9	0	0	0	1	16 hours
4.57944	52.1495	4					18.226	146.323	2						14		95.092	24.0491	119.141	71.0429	91.2577	10.5215	101.779	80.7362	0	0	0	1	ON		10	0	0	1	0	16 hours
															15		73.9796	4.91542	78.8951	69.0642	87.7705	24.5771	112.348	63.1934	0	0	1	0	ON		11	0	0	0	1	16 hours
0	-22.8728	5	16 hours	αIRKO	1		0	41.892	3	ON	FIRKO	1			16		92.5034	22.0508	114.554	70.4526	98.7463	22.0508	120.797	76.6955	0	0	1	0	ON		12	0	1	0	1	16 hours
0	-16.6687	5					0	66.581	3				T>C	1	17		82.7586	18.023	100.782	64.7356	72.4138	23.6552	96.069	48.7586	0	0	0	1	ON		13	0	0	1	0	16 hours
0	-10.4645	5					0	91.2699	3						18		88.466	9.24534	97.7114	79.2207	105.447	5.54721	110.994	99.9001	1	0	1	0	ON		14	0	0	0	1	16 hours
															19		88.466	9.24534	97.7114	79.2207	73.3716	22.1888	95.5604	51.1828	0	0	0	1	ON			0	2	6	7
0	0	6	16 hours	αIRKO	2		-4.57944	10.9346	4	ON	FIRKO	2			20		88.466	9.24534	97.7114	79.2207	224.316	22.1888	246.505	202.127	1	0	1	0	ON		1	1	0	1	0	ON
0	0	6					0	31.5421	4				T>C	2	21		89.8477	8.70558	98.5533	81.1421	92.3858	6.21827	98.6041	86.1675	0	0	1	0	ON		2	1	0	1	0	ON
0	0	6					4.57944	52.1495	4						22		128.553	41.0406	169.594	87.5127	205.33	27.3604	232.69	177.97	1	0	1	0	ON		3	0	0	0	1	ON
															23		79.3492	6.04302	85.3922	73.3061	64.676	15.1358	79.8119	49.5402	0	0	0	1	ON		4	0	0	1	0	ON
-36.0837	-0.870293	7	16 hours	αIRKO	3		-24.0491	-14.3558	14	ON	MIRKO	3			24		111.951	7.74439	119.696	104.207	120.9	29.1578	150.058	91.7418	0	0	1	0	16 hours		5	0	0	1	0	ON
0	38.4937	7					0	-3.83436	14				T<C	1	25		124.829	13.23	138.059	111.599	119.205	26.46	145.665	92.7454	0	0	0	1	4 hours		6	0	0	0	1	ON
36.0837	77.8577	7					24.0491	6.68712	14						26		124.829	13.23	138.059	111.599	256.452	79.38	335.832	177.072	1	0	1	0	4 hours		7	1	0	1	0	ON
															27		64.6079	9.92342	74.5314	54.6845	53.4694	7.44256	60.912	46.0268	0	0	0	1	16 hours		8	0	0	0	1	ON
-50.8452	-41.8075	8	16 hours	αIRKO	4		-4.91542	-10.7863	15	ON	MIRKO	4			28		80.9588	10.3632	91.322	70.5957	59.7989	7.40523	67.2041	52.3937	0	1	0	1	16 hours		9	1	0	1	0	ON
0	0.83682	8					0	13.7908	15				T>C	3	29		83.6336	6.82917	90.4628	76.8044	79.4414	8.19501	87.6364	71.2464	0	0	0	1	ON		10	0	0	1	0	ON
50.8452	43.4812	8					4.91542	38.3679	15						30		87.3134	6.38421	93.6976	80.9291	182.435	35.7516	218.186	146.683	1	0	1	0	ON		11	1	0	1	0	ON
															31		97.8124	7.37321	105.186	90.4392	180.568	15.9753	196.544	164.593	1	0	1	0	ON		12	0	0	0	1	ON
-62.3264	-63.6318	9	16 hours	αIRKO	5		-22.0508	-15.8079	16	ON	MIRKO	5			32		90.0715	0	90.0715	90.0715	112.572	7.78808	120.36	104.784	1	0	1	0	ON		13	0	0	0	1	ON
0	-24.2678	9					0	6.24295	16				T>C	4	33		96.389	0	96.389	96.389	144.586	27.1563	171.742	117.429	1	0	1	0	ON		14	1	0	1	0	ON
62.3264	15.0962	9					22.0508	28.2937	16						34		96.6449	0	96.6449	96.6449	121.102	11.9871	133.089	109.114	1	0	1	0	ON		15	1	0	1	0	ON
															35		124.465	19.1804	143.645	105.284	163.609	29.9694	193.578	133.639	0	0	1	0	ON		16	1	0	1	0	ON
-5.88674	-0.394681	10	16 hours	LIRKO	6		-18.023	-34	17	ON	MIRKO	6			36		124.465	19.1804	143.645	105.284	122.535	39.1209	161.656	83.4138	0	0	0	1	ON		17	1	0	1	0	ON
0	10.3853	10					0	-10.3448	17				T<C	2	37		52.9826	10.6519	63.6345	42.3307	63.8519	7.98896	71.8409	55.863	0	0	1	0	ON		18	1	0	1	0	ON
5.88674	21.1653	10					18.023	13.3103	17						38		96.6894	6.78966	103.479	89.8997	73.1334	11.5424	84.6759	61.591	0	1	0	1	ON		19	0	0	1	0	ON
															39		109.971	14.3695	124.34	95.6012	131.965	20.1173	152.082	111.848	0	0	1	0	16 hours		20	0	0	0	1	ON
-18.931	-19.8485	11	16 hours	LIRKO	7		-9.24534	11.434	18	ON	βIRKO	7			40		112.069	18.1034	130.172	93.9655	100.985	25.3448	126.33	75.6404	0	0	0	1	16 hours		21	0	0	1	0	ON
0	13.2781	11					0	16.9812	18				T>C	5	41		64.0294	11.5905	75.6199	52.4388	59.7434	0	59.7434	59.7434	0	0	0	1	ON		22	0	1	0	1	ON
18.931	46.4048	11					9.24534	22.5285	18						42		83.0582	12.3686	95.4267	70.6896	107.335	12.3686	119.704	94.9668	0	0	1	0	ON		23	0	0	0	1	ON
															43		64.0294	11.5905	75.6199	52.4388	61.879	4.21474	66.0937	57.6642	0	0	0	1	ON		24	0	0	1	0	ON
-29.8594	-35.4219	12	16 hours	LIRKO	8		-9.24534	-37.2833	19	ON	LIRKO	8			44		83.0582	12.3686	95.4267	70.6896	74.3267	0	74.3267	74.3267	0	0	0	1	ON		25	0	0	0	1	ON
0	-10.1562	12					0	-15.0944	19				T<C	3	45		64.0294	11.5905	75.6199	52.4388	51.1271	0	51.1271	51.1271	0	1	0	1	ON		26	0	0	0	1	ON
29.8594	15.1094	12					9.24534	7.09439	19						46		83.0582	12.3686	95.4267	70.6896	75.2853	12.3746	87.6598	62.9107	0	0	0	1	ON		27	0	1	0	1	ON
																									13	4	25	20			28	0	0	0	1	ON
-28.3906	-54.618	13	16 hours	LIRKO	9		-9.24534	113.661	20	ON	βIRKO	9																				10	2	16	12
0	-33.7983	13					0	135.85	20				T>C	6
28.3906	-12.9785	13					9.24534	158.039	20
-24.0491	-14.3558	14	ON	MIRKO	3		-8.70558	-3.6802	21	ON	βIRKO	10
0	-3.83436	14					0	2.53807	21				T>C	7
24.0491	6.68712	14					8.70558	8.75635	21
-4.91542	-10.7863	15	ON	MIRKO	4		-41.0406	49.4162	22	ON	βIRKO	11
0	13.7908	15					0	76.7766	22				T>C	8
4.91542	38.3679	15					41.0406	104.137	22
-22.0508	-15.8079	16	ON	MIRKO	5		-6.04302	-29.809	23	ON	LIRKO	12
0	6.24295	16					0	-14.6731	23				T<C	4
22.0508	28.2937	16					6.04302	0.4627	23
-18.023	-34	17	ON	MIRKO	6		-6.82917	-12.3872	29	ON	FIRKO	13
0	-10.3448	17					0	-4.19221	29				T<C	5
18.023	13.3103	17					6.82917	4.0028	29
-9.24534	11.434	18	ON	βIRKO	7		-6.38421	59.3697	30	ON	FIRKO	14
0	16.9812	18					0	95.1213	30				T>C	9
9.24534	22.5285	18					6.38421	130.873	30
-9.24534	-37.2833	19	ON	LIRKO	8		-7.37321	66.7807	31	ON	FIRKO	15
0	-15.0944	19					0	82.756	31				T>C	10
9.24534	7.09439	19					7.37321	98.7313	31
-9.24534	113.661	20	ON	βIRKO	9		0	14.7128	32	ON	FIRKO	16
0	135.85	20					0	22.5009	32				T>C	11
9.24534	158.039	20					0	30.289	32
-8.70558	-3.6802	21	ON	βIRKO	10		0	21.0404	33	ON	FIRKO	17
0	2.53807	21					0	48.1967	33				T>C	12
8.70558	8.75635	21					0	75.3531	33
-41.0406	49.4162	22	ON	βIRKO	11		0	12.4695	34	ON	FIRKO	18
0	76.7766	22					0	24.4566	34				T>C	13
41.0406	104.137	22					0	36.4437	34
-6.04302	-29.809	23	ON	LIRKO	12		-19.1804	9.17431	35	ON	Ins R	19
0	-14.6731	23					0	39.1437	35				T>C	14
6.04302	0.4627	23					19.1804	69.1131	35
-7.74439	-20.2094	24	16 hours	LIRKO	10		-19.1804	-41.0511	36	ON	Ins R K103R	20
0	8.94845	24					0	-1.93013	36				T<C	6
7.74439	38.1063	24					19.1804	37.1908	36
-13.23	-32.0831	25	4 hours	βIRKO	1		-10.6519	2.88037	37	ON	MIRKO	21
0	-5.62314	25					0	10.8693	37				T>C	15
13.23	20.8369	25					10.6519	18.8583	37
-13.23	52.2431	26	4 hours	βIRKO	2		-6.78966	-35.0984	38	ON	MIRKO	22
0	131.623	26					0	-23.556	38				T<C	7
13.23	211.003	26					6.78966	-12.0135	38
-9.92342	-18.5811	27	16 hours	FIRKO	11		-11.5905	-4.28593	41	ON	βIRKO	23
0	-11.1385	27					0	-4.28593	41				T<C	8
9.92342	-3.69597	27					11.5905	-4.28593	41
-10.3632	-28.5651	28	16 hours	FIRKO	12		-12.3686	11.9087	42	ON	βIRKO	24
0	-21.1599	28					0	24.2772	42				T>C	16
10.3632	-13.7547	28					12.3686	36.6458	42
-6.82917	-12.3872	29	ON	FIRKO	13		-11.5905	-6.36512	43	ON	MIRKO	25
0	-4.19221	29					0	-2.15038	43				T<C	9
6.82917	4.0028	29					11.5905	2.06436	43
-6.38421	59.3697	30	ON	FIRKO	14		-12.3686	-8.73148	44	ON	MIRKO	26
0	95.1213	30					0	-8.73148	44				T<C	10
6.38421	130.873	30					12.3686	-8.73148	44
-7.37321	66.7807	31	ON	FIRKO	15		-11.5905	-12.9023	45	ON	βIRKO-MIRKO	27
0	82.756	31					0	-12.9023	45				T<C	11
7.37321	98.7313	31					11.5905	-12.9023	45
0	14.7128	32	ON	FIRKO	16		-12.3686	-20.1474	46	ON	βIRKO-MIRKO	28
0	22.5009	32					0	-7.77287	46				T<C	12
0	30.289	32					12.3686	4.60168	46
0	21.0404	33	ON	FIRKO	17		0	-22.8728	5	16 hours	αIRKO	1
0	48.1967	33					0	-16.6687	5				T<C	1
0	75.3531	33					0	-10.4645	5
0	12.4695	34	ON	FIRKO	18		0	0	6	16 hours	αIRKO	2
0	24.4566	34					0	0	6				T=C
0	36.4437	34					0	0	6
-19.1804	9.17431	35	ON	Ins R	19		-36.0837	-0.870293	7	16 hours	αIRKO	3
0	39.1437	35					0	38.4937	7				T>C	1
19.1804	69.1131	35					36.0837	77.8577	7
-19.1804	-41.0511	36	ON	Ins R K103R	20		-50.8452	-41.8075	8	16 hours	αIRKO	4
0	-1.93013	36					0	0.83682	8				T>C	2
19.1804	37.1908	36					50.8452	43.4812	8
-10.6519	2.88037	37	ON	MIRKO	21		-62.3264	-63.6318	9	16 hours	αIRKO	5
0	10.8693	37					0	-24.2678	9				T<C	2
10.6519	18.8583	37					62.3264	15.0962	9
-6.78966	-35.0984	38	ON	MIRKO	22		-5.88674	-0.394681	10	16 hours	LIRKO	6
0	-23.556	38					0	10.3853	10				T>C	3
6.78966	-12.0135	38					5.88674	21.1653	10
-14.3695	1.87683	39	16 hours	LIRKO	13		-18.931	-19.8485	11	16 hours	LIRKO	7
0	21.9941	39					0	13.2781	11				T>C	4
14.3695	42.1114	39					18.931	46.4048	11
-18.1034	-36.4286	40	16 hours	LIRKO	14		-29.8594	-35.4219	12	16 hours	LIRKO	8
0	-11.0837	40					0	-10.1562	12				T<C	3
18.1034	14.2611	40					29.8594	15.1094	12
-11.5905	-4.28593	41	ON	βIRKO	23		-28.3906	-54.618	13	16 hours	LIRKO	9
0	-4.28593	41					0	-33.7983	13				T<C	4
11.5905	-4.28593	41					28.3906	-12.9785	13
-12.3686	11.9087	42	ON	βIRKO	24		-7.74439	-20.2094	24	16 hours	LIRKO	10
0	24.2772	42					0	8.94845	24				T>C	5
12.3686	36.6458	42					7.74439	38.1063	24
-11.5905	-6.36512	43	ON	MIRKO	25		-9.92342	-18.5811	27	16 hours	FIRKO	11
0	-2.15038	43					0	-11.1385	27				T<C	5
11.5905	2.06436	43					9.92342	-3.69597	27
-12.3686	-8.73148	44	ON	MIRKO	26		-10.3632	-28.5651	28	16 hours	FIRKO	12
0	-8.73148	44					0	-21.1599	28				T<C	6
12.3686	-8.73148	44					10.3632	-13.7547	28
-11.5905	-12.9023	45	ON	βIRKO-MIRKO	27		-14.3695	1.87683	39	16 hours	LIRKO	13
0	-12.9023	45					0	21.9941	39				T>C	6
11.5905	-12.9023	45					14.3695	42.1114	39
-12.3686	-20.1474	46	ON	βIRKO-MIRKO	28		-18.1034	-36.4286	40	16 hours	LIRKO	14
0	-7.77287	46					0	-11.0837	40				T<C	7
12.3686	4.60168	46					18.1034	14.2611	40

## Sheet: 15 min_all
Kind of IRKO		15 minutes/fed
		Control		IRKO
	Sr. no.	mean	95% CI	mean	95% CI	Control 0-CI	Control 0	Control 0+CI	(IRKO-Control)-CI	IRKO-Control	(IRKO-control)+CI
inducible DO IR and IGF-R	1	364.191	18.1161	486.965	55.6304	-18.1161	0	18.1161	67.1439	122.774	178.405
αIRKO (2 months old)	2	255.101	21.7765	251.933	60.663	-21.7765	0	21.7765	-63.8314	-3.1684	57.4946
αIRKO (5 months old)	3	296.201	0	264.427	0	0	0	0	-31.7746	-31.7746	-31.7746
LIRKO	4	161.644	17.398	193.285	17.3886	-17.398	0	17.398	14.2532	31.6418	49.0304
FIRKO (2 months old)	5	152.963	9.92342	149.925	6.94639	-9.92342	0	9.92342	-9.98417	-3.03778	3.90861
FIRKO (10 months old)	6	199.977	7.39486	161.183	6.41786	-7.39486	0	7.39486	-45.2114	-38.7935	-32.3757
MIRKO	7	147.755	37.2818	183.086	24.6326	-37.2818	0	37.2818	10.6981	35.3307	59.9633
MIRKO	8	200.494	10.8635	199.112	19.011	-10.8635	0	10.8635	-20.3927	-1.38167	17.6294
βIRKO(2 months old)	9	180.294	13.6979	204.501	3.16106	-13.6979	0	13.6979	21.0455	24.2066	27.3676
βIRKO(6 months old)	10	211.826	10.4657	305.02	27.5914	-10.4657	0	10.4657	65.6035	93.1949	120.786
MIRKO(2 months old)	11	180.294	13.6979	166.855	13.6979	-13.6979	0	13.6979	-27.1378	-13.4399	0.258045
MIRKO(6 months old)	12	211.826	10.4657	200.169	14.2714	-10.4657	0	10.4657	-25.9277	-11.6562	2.61516
βIRKO-MIRKO (2 months old)	13	180.294	13.6979	195.877	0	-13.6979	0	13.6979	15.5828	15.5828	15.5828
βIRKO-MIRKO (6 months old)	14	211.826	10.4657	243.863	32.3485	-10.4657	0	10.4657	-0.31067	32.0379	64.3864
								Control	IRKO
	-18.1161	0	18.1161	67.1439	122.774	178.405		-18.1161	67.1439	1									iiser
	-21.7765	0	21.7765	-63.8314	-3.1684	57.4946		0	122.774	1
	0	0	0	-31.7746	-31.7746	-31.7746		18.1161	178.405	1
	-17.398	0	17.398	14.2532	31.6418	49.0304
	-9.92342	0	9.92342	-9.98417	-3.03778	3.90861		-21.7765	-63.8314	2
	-7.39486	0	7.39486	-45.2114	-38.7935	-32.3757		0	-3.1684	2
	-37.2818	0	37.2818	10.6981	35.3307	59.9633		21.7765	57.4946	2
	-10.8635	0	10.8635	-20.3927	-1.38167	17.6294
	-13.6979	0	13.6979	21.0455	24.2066	27.3676		0	-31.7746	3
	-10.4657	0	10.4657	65.6035	93.1949	120.786		0	-31.7746	3
	-13.6979	0	13.6979	-27.1378	-13.4399	0.258045		0	-31.7746	3
	-10.4657	0	10.4657	-25.9277	-11.6562	2.61516
	-13.6979	0	13.6979	15.5828	15.5828	15.5828		-17.398	14.2532	4
	-10.4657	0	10.4657	-0.31067	32.0379	64.3864		0	31.6418	4
								17.398	49.0304	4
								-9.92342	-9.98417	5
								0	-3.03778	5
								9.92342	3.90861	5
								-7.39486	-45.2114	6
								0	-38.7935	6
								7.39486	-32.3757	6
								-37.2818	10.6981	7
								0	35.3307	7
								37.2818	59.9633	7
								-10.8635	-20.3927	8
								0	-1.38167	8
								10.8635	17.6294	8
								-13.6979	21.0455	9
								0	24.2066	9
								13.6979	27.3676	9
								-10.4657	65.6035	10
								0	93.1949	10
								10.4657	120.786	10
								-13.6979	-27.1378	11
								0	-13.4399	11
								13.6979	0.258045	11
								-10.4657	-25.9277	12
								0	-11.6562	12
								10.4657	2.61516	12
								-13.6979	15.5828	13
								0	15.5828	13
								13.6979	15.5828	13
								-10.4657	-0.31067	14
								0	32.0379	14
								10.4657	64.3864	14
		15 minutes/fed
		Control				IRKO						only means compared
	Sr. no.	mean	95% CI	upper bound	lower bound	mean	95% CI	upper bound	lower bound	IRKO > control	IRKO< Control	IRKO> Con	IRKO <Con
	1	364.191	18.1161	382.307	346.075	486.965	55.6304	542.596	431.335	1	0	1	0
	2	255.101	21.7765	276.878	233.325	251.933	60.663	312.596	191.27	0	0	0	1
	3	296.201	0	296.201	296.201	264.427	0	264.427	264.427	0	1	0	1
	4	161.644	17.398	179.042	144.246	193.285	17.3886	210.674	175.897	0	0	1	0
	5	152.963	9.92342	162.886	143.039	149.925	6.94639	156.871	142.978	0	0	0	1
	6	199.977	7.39486	207.372	192.582	161.183	6.41786	167.601	154.765	0	1	0	1
	7	147.755	37.2818	185.037	110.473	183.086	24.6326	207.718	158.453	0	0	1	0
	8	200.494	10.8635	211.357	189.63	199.112	19.011	218.123	180.101	0	0	0	1
	9	180.294	13.6979	193.992	166.596	204.501	3.16106	207.662	201.34	1	0	1	0
	10	211.826	10.4657	222.291	201.36	305.02	27.5914	332.612	277.429	1	0	1	0
	11	180.294	13.6979	193.992	166.596	166.855	13.6979	180.552	153.157	0	0	0	1
	12	211.826	10.4657	222.291	201.36	200.169	14.2714	214.441	185.898	0	0	0	1
	13	180.294	13.6979	193.992	166.596	195.877	0	195.877	195.877	1	0	1	0
	14	211.826	10.4657	222.291	201.36	243.863	32.3485	276.212	211.515	0	0	1	0
										4	2	7	7

## Sheet: 30 min_all
Kind of IRKO		30 minutes/fed
		Control			IRKO
	Sr. no.	mean	95% CI	mean	95% CI	Control 0-CI	Control 0	Control 0+CI	(IRKO-Control)-CI	IRKO-Control	(IRKO-control)+CI
inducible DO IR and IGF-R	1	248.522	23.2832	509.906	46.5703	-23.2832	0	23.2832	214.814	261.384	307.954
αIRKO (2 months old)	2	219.984	23.3319	304.118	80.8781	-23.3319	0	23.3319	3.25582	84.134	165.012
αIRKO (5 months old)	3	257.422	0	294.802	35.4131	0	0	0	1.96697	37.38	72.7931
LIRKO (2 months old)	4	208.635	48.2814	314.851	42.1399	-48.2814	0	48.2814	64.0764	106.216	148.356
LIRKO (4 months old)	5	233.961	26.0281	336.578	41.8027	-26.0281	0	26.0281	60.8142	102.617	144.419
LIRKO (6 months old)	6	225.781	34.4531	381.72	89.7337	-34.4531	0	34.4531	66.2051	155.939	245.672
LIRKO (12 months old)	7	212.73	42.5858	381.72	45.4249	-42.5858	0	42.5858	123.566	168.99	214.415
MIRKO (7 weeks old)	8	436.067	12.0342	431.465	31.5644	-12.0342	0	12.0342	-36.1656	-4.60123	26.9632
MIRKO (16 weeks old)	9	380.836	29.4925	385.222	33.1791	-29.4925	0	29.4925	-28.7928	4.38632	37.5654
MIRKO (24 weeks old)	10	332.288	41.6515	349.785	41.6515	-41.6515	0	41.6515	-24.1545	17.497	59.1485
MIRKO (40 weeks old)	11	299.425	37.1724	358.621	37.1724	-37.1724	0	37.1724	22.023	59.1954	96.3678
βIRKO (4/5 weeks old)	12	225.978	12.9435	224.087	79.51	-12.9435	0	12.9435	-81.4007	-1.89075	77.6192
LIRKO (4/5 weeks old)	13	225.978	12.9435	273.144	18.4907	-12.9435	0	12.9435	28.6755	47.1662	65.6569
βIRKO-LIRKO (4/5 weeks old)	14	225.978	12.9435	441.07	90.6044	-12.9435	0	12.9435	124.487	215.092	305.696
βIRKO (chow 20 weeks old)	15	202.792	34.8223	346.193	39.797	-34.8223	0	34.8223	103.604	143.401	183.198
βIRKO (HFD 20 weeks old)	16	370.939	48.5025	478.173	47.2589	-48.5025	0	48.5025	59.9746	107.234	154.492
LIRKO	17	198.423	41.5795	216.945	37.8082	-41.5795	0	41.5795	-19.2867	18.5215	56.3296
LIRKO	18	284.488	24.5239	411.779	47.9022	-24.5239	0	24.5239	79.3895	127.292	175.194
βIRKO-ND	19	290.762	41.895	305.395	15.4204	-41.895	0	41.895	-0.78802	14.6324	30.0529
βIRKO-D	20	290.762	41.895	566.387	123.48	-41.895	0	41.895	152.145	275.625	399.105
FIRKO (2 months old)	21	186.633	15.8775	169.415	5.95405	-15.8775	0	15.8775	-23.1724	-17.2183	-11.2643
FIRKO (10 months old)	22	219.744	16.2977	170.38	1.97473	-16.2977	0	16.2977	-51.3387	-49.364	-47.3892
BATIRKO (male, 3 months old)	23	179.331	8.19501	219.738	35.5117	-8.19501	0	8.19501	4.89477	40.4065	75.9182
BATIRKO (male, 6 months old)	24	214.123	29.3674	319.648	17.8758	-29.3674	0	29.3674	87.6496	105.525	123.401
BATIRKO (male, 12 months old)	25	211.49	11.0598	348.175	31.9506	-11.0598	0	11.0598	104.734	136.685	168.635
BATIRKO (female, 3 months old)	26	169.074	15.5762	216.782	22.0662	-15.5762	0	15.5762	25.642	47.7082	69.7745
BATIRKO (female, 6 months old)	27	165.862	11.8071	262.251	53.1319	-11.8071	0	11.8071	43.257	96.389	149.521
BATIRKO (female, 12 months old)	28	166.359	10.7884	275.215	52.7434	-10.7884	0	10.7884	56.1124	108.856	161.599
Ins R	29	263.914	33.5657	320.183	45.5535	-33.5657	0	33.5657	10.7156	56.2691	101.823
Ins R-K1030 mutant	30	263.914	33.5657	281.52	33.6622	-33.5657	0	33.5657	-16.0568	17.6054	51.2676
MIRKO	31	197.691	38.6133	198.365	27.2956	-38.6133	0	38.6133	-26.6217	0.673942	27.9695
MIRKO	32	231.544	25.1373	259.965	32.5904	-25.1373	0	25.1373	-4.16877	28.4216	61.012
LIRKO (2 months old)	33	294.721	22.9912	319.648	61.7889	-22.9912	0	22.9912	-36.8622	24.9267	86.7155
LIRKO (6 months old)	34	291.872	25.3448	302.956	63.9655	-25.3448	0	25.3448	-52.8818	11.0837	75.0493
βIRKO(2 months old)	35	164.571	7.3758	256.77	3.16106	-7.3758	0	7.3758	89.0383	92.1993	95.3604
βIRKO(6 months old)	36	226.992	14.2714	352.237	34.2514	-14.2714	0	14.2714	90.9936	125.245	159.496
MIRKO(2 months old)	37	164.571	7.3758	212.68	29.5032	-7.3758	0	7.3758	18.606	48.1092	77.6123
MIRKO(6 months old)	38	226.992	14.2714	246.403	21.8828	-14.2714	0	14.2714	-2.47206	19.4108	41.2936
βIRKO-MIRKO (2 months old)	39	164.571	7.3758	244.935	8.42948	-7.3758	0	7.3758	71.9353	80.3648	88.7943
βIRKO-MIRKO (6 months old)	40	226.992	14.2714	281.353	35.2088	-14.2714	0	14.2714	19.1523	54.3611	89.57
1	-23.2832	0	23.2832	214.814	261.384	307.954		Control	IRKO
2	-23.3319	0	23.3319	3.25582	84.134	165.012		-23.2832	214.814	1
3	0	0	0	1.96697	37.38	72.7931		0	261.384	1
4	-48.2814	0	48.2814	64.0764	106.216	148.356		23.2832	307.954	1
5	-26.0281	0	26.0281	60.8142	102.617	144.419
6	-34.4531	0	34.4531	66.2051	155.939	245.672		-23.3319	3.25582	2
7	-42.5858	0	42.5858	123.566	168.99	214.415		0	84.134	2
8	-12.0342	0	12.0342	-36.1656	-4.60123	26.9632		23.3319	165.012	2
9	-29.4925	0	29.4925	-28.7928	4.38632	37.5654
10	-41.6515	0	41.6515	-24.1545	17.497	59.1485		0	1.96697	3
11	-37.1724	0	37.1724	22.023	59.1954	96.3678		0	37.38	3
12	-12.9435	0	12.9435	-81.4007	-1.89075	77.6192		0	72.7931	3
13	-12.9435	0	12.9435	28.6755	47.1662	65.6569
14	-12.9435	0	12.9435	124.487	215.092	305.696		-48.2814	64.0764	4
15	-34.8223	0	34.8223	103.604	143.401	183.198		0	106.216	4
16	-48.5025	0	48.5025	59.9746	107.234	154.492		48.2814	148.356	4
17	-41.5795	0	41.5795	-19.2867	18.5215	56.3296
18	-24.5239	0	24.5239	79.3895	127.292	175.194		-26.0281	60.8142	5
19	-41.895	0	41.895	-0.78802	14.6324	30.0529		0	102.617	5
20	-41.895	0	41.895	152.145	275.625	399.105		26.0281	144.419	5
21	-15.8775	0	15.8775	-23.1724	-17.2183	-11.2643
22	-16.2977	0	16.2977	-51.3387	-49.364	-47.3892		-34.4531	66.2051	6
23	-8.19501	0	8.19501	4.89477	40.4065	75.9182		0	155.939	6
24	-29.3674	0	29.3674	87.6496	105.525	123.401		34.4531	245.672	6
25	-11.0598	0	11.0598	104.734	136.685	168.635
26	-15.5762	0	15.5762	25.642	47.7082	69.7745		-42.5858	123.566	7
27	-11.8071	0	11.8071	43.257	96.389	149.521		0	168.99	7
28	-10.7884	0	10.7884	56.1124	108.856	161.599		42.5858	214.415	7
29	-33.5657	0	33.5657	10.7156	56.2691	101.823
30	-33.5657	0	33.5657	-16.0568	17.6054	51.2676		-12.0342	-36.1656	8
31	-38.6133	0	38.6133	-26.6217	0.673942	27.9695		0	-4.60123	8
32	-25.1373	0	25.1373	-4.16877	28.4216	61.012		12.0342	26.9632	8
33	-22.9912	0	22.9912	-36.8622	24.9267	86.7155
34	-25.3448	0	25.3448	-52.8818	11.0837	75.0493		-12.0342	-28.7928	9
35	-7.3758	0	7.3758	89.0383	92.1993	95.3604		0	4.38632	9
36	-14.2714	0	14.2714	90.9936	125.245	159.496		12.0342	37.5654	9
37	-7.3758	0	7.3758	18.606	48.1092	77.6123
38	-14.2714	0	14.2714	-2.47206	19.4108	41.2936		-41.6515	-24.1545	10
39	-7.3758	0	7.3758	71.9353	80.3648	88.7943		0	17.497	10
40	-14.2714	0	14.2714	19.1523	54.3611	89.57		41.6515	59.1485	10
								-37.1724	22.023	11
								0	59.1954	11
								37.1724	96.3678	11
								-12.9435	-81.4007	12
								0	-1.89075	12
								12.9435	77.6192	12
								-12.9435	28.6755	13
								0	47.1662	13
								12.9435	65.6569	13
								-12.9435	124.487	14
								0	215.092	14
								12.9435	305.696	14
								-34.8223	103.604	15
								0	143.401	15
								34.8223	183.198	15
								-48.5025	59.9746	16
								0	107.234	16
								48.5025	154.492	16
								-41.5795	-19.2867	17
								0	18.5215	17
								41.5795	56.3296	17
								-24.5239	79.3895	18
								0	127.292	18
								24.5239	175.194	18
								-41.895	-0.78802	19
								0	14.6324	19
								41.895	30.0529	19
								-41.895	152.145	20
								0	275.625	20
								41.895	399.105	20
								-15.8775	-23.1724	21
								0	-17.2183	21
								15.8775	-11.2643	21
								-16.2977	-51.3387	22
								0	-49.364	22
								16.2977	-47.3892	22
								-8.19501	4.89477	23
								0	40.4065	23
								8.19501	75.9182	23
								-29.3674	87.6496	24
								0	105.525	24
								29.3674	123.401	24
								-11.0598	104.734	25
								0	136.685	25
								11.0598	168.635	25
								-15.5762	25.642	26
								0	47.7082	26
								15.5762	69.7745	26
								-11.8071	43.257	27
								0	96.389	27
								11.8071	149.521	27
								-10.7884	56.1124	28
								0	108.856	28
								10.7884	161.599	28
								-33.5657	10.7156	29
								0	56.2691	29
								33.5657	101.823	29
								-33.5657	-16.0568	30
								0	17.6054	30
								33.5657	51.2676	30
								-38.6133	-26.6217	31
								0	0.673942	31
								38.6133	27.9695	31
								-25.1373	-4.16877	32
								0	28.4216	32
								25.1373	61.012	32
								-22.9912	-36.8622	33
								0	24.9267	33
								22.9912	86.7155	33
								-25.3448	-52.8818	34
								0	11.0837	34
								25.3448	75.0493	34
								-7.3758	89.0383	35
								0	92.1993	35
								7.3758	95.3604	35
								-14.2714	90.9936	36
								0	125.245	36
								14.2714	159.496	36
								-7.3758	18.606	37
								0	48.1092	37
								7.3758	77.6123	37
								-14.2714	-2.47206	38
								0	19.4108	38
								14.2714	41.2936	38
								-7.3758	71.9353	39
								0	80.3648	39
								7.3758	88.7943	39
								-14.2714	19.1523	40
								0	54.3611	40
								14.2714	89.57	40
		30 minutes/fed
		Control					IRKO					only means compared
	Sr. no.	mean	95% CI	upper bound	lower bound	mean	95% CI	upper bound	lower bound	IRKO > control	IRKO< Control	IRKO> Con	IRKO <Con
	1	248.522	23.2832	271.805	225.239	509.906	46.5703	556.476	463.336	1	0	1	0
	2	219.984	23.3319	243.316	196.652	304.118	80.8781	384.996	223.24	0	0	1	0
	3	257.422	0	257.422	257.422	294.802	35.4131	330.215	259.389	1	0	1	0
	4	208.635	48.2814	256.916	160.353	314.851	42.1399	356.991	272.711	1	0	1	0
	5	233.961	26.0281	259.989	207.933	336.578	41.8027	378.381	294.775	1	0	1	0
	6	225.781	34.4531	260.234	191.328	381.72	89.7337	471.454	291.986	1	0	1	0
	7	212.73	42.5858	255.315	170.144	381.72	45.4249	427.145	336.295	1	0	1	0
	8	436.067	12.0342	448.101	424.032	431.465	31.5644	463.03	399.901	0	0	0	1
	9	380.836	29.4925	410.328	351.343	385.222	33.1791	418.401	352.043	0	0	1	0
	10	332.288	41.6515	373.939	290.636	349.785	41.6515	391.436	308.133	0	0	1	0
	11	299.425	37.1724	336.598	262.253	358.621	37.1724	395.793	321.448	0	0	1	0
	12	225.978	12.9435	238.921	213.034	224.087	79.51	303.597	144.577	0	0	0	1
	13	225.978	12.9435	238.921	213.034	273.144	18.4907	291.635	254.653	1	0	1	0
	14	225.978	12.9435	238.921	213.034	441.07	90.6044	531.674	350.465	1	0	1	0
	15	202.792	34.8223	237.614	167.97	346.193	39.797	385.99	306.396	1	0	1	0
	16	370.939	48.5025	419.442	322.437	478.173	47.2589	525.431	430.914	1	0	1	0
	17	198.423	41.5795	240.003	156.844	216.945	37.8082	254.753	179.137	0	0	1	0
	18	284.488	24.5239	309.012	259.964	411.779	47.9022	459.682	363.877	1	0	1	0
	19	290.762	41.895	332.657	248.867	305.395	15.4204	320.815	289.974	0	0	1	0
	20	290.762	41.895	332.657	248.867	566.387	123.48	689.867	442.907	1	0	1	0
	21	186.633	15.8775	202.51	170.755	169.415	5.95405	175.369	163.461	0	0	0	1
	22	219.744	16.2977	236.042	203.446	170.38	1.97473	172.355	168.405	0	1	0	1
	23	179.331	8.19501	187.526	171.136	219.738	35.5117	255.249	184.226	0	0	1	0
	24	214.123	29.3674	243.49	184.755	319.648	17.8758	337.524	301.772	1	0	1	0
	25	211.49	11.0598	222.55	200.43	348.175	31.9506	380.125	316.224	1	0	1	0
	26	169.074	15.5762	184.65	153.498	216.782	22.0662	238.848	194.716	1	0	1	0
	27	165.862	11.8071	177.669	154.054	262.251	53.1319	315.382	209.119	1	0	1	0
	28	166.359	10.7884	177.148	155.571	275.215	52.7434	327.958	222.472	1	0	1	0
	29	263.914	33.5657	297.48	230.349	320.183	45.5535	365.737	274.63	0	0	1	0
	30	263.914	33.5657	297.48	230.349	281.52	33.6622	315.182	247.858	0	0	1	0
	31	197.691	38.6133	236.305	159.078	198.365	27.2956	225.661	171.07	0	0	1	0
	32	231.544	25.1373	256.681	206.406	259.965	32.5904	292.556	227.375	0	0	1	0
	33	294.721	22.9912	317.713	271.73	319.648	61.7889	381.437	257.859	0	0	1	0
	34	291.872	25.3448	317.217	266.527	302.956	63.9655	366.921	238.99	0	0	1	0
	35	164.571	7.3758	171.946	157.195	256.77	3.16106	259.931	253.609	1	0	1	0
	36	226.992	14.2714	241.263	212.721	352.237	34.2514	386.488	317.986	1	0	1	0
	37	164.571	7.3758	171.946	157.195	212.68	29.5032	242.183	183.177	1	0	1	0
	38	226.992	14.2714	241.263	212.721	246.403	21.8828	268.286	224.52	0	0	1	0
	39	164.571	7.3758	171.946	157.195	244.935	8.42948	253.365	236.506	1	0	1	0
	40	226.992	14.2714	241.263	212.721	281.353	35.2088	316.562	246.144	1	0	1	0
										22	1	36	4

## Sheet: 60 min_all
Kind of IRKO	Sr.no	60 minutes/fed
		Control			IRKO
		mean	95% CI	mean	95% CI	Control 0-CI	Control 0	Control 0+CI	(IRKO-Control)-CI	IRKO-Control	(IRKO-control)+CI
inducible DO IR and IGF-R	1	193.401	25.8746	421.122	49.1617	-25.8746	0	25.8746	178.559	227.721	276.882
αIRKO (2 months old)	2	141.814	0	248.157	96.4386	0	0	0	9.90417	106.343	202.781
αIRKO (5 months old)	3	183.583	0	252.116	52.5125	0	0	0	16.0208	68.5334	121.046
LIRKO (2 months old)	4	167.84	26.5893	242.75	38.2199	-26.5893	0	26.5893	36.6896	74.9095	113.129
LIRKO (4 months old)	5	167.799	23.6545	265.995	54.4223	-23.6545	0	23.6545	43.7732	98.1956	152.618
LIRKO (6 months old)	6	191.406	43.6406	329.77	6.28646	-43.6406	0	43.6406	132.077	138.364	144.65
LIRKO (12 months old)	7	127.95	40.6913	329.77	82.3326	-40.6913	0	40.6913	119.488	201.82	284.153
MIRKO (7 weeks old)	8	419.709	73.631	363.717	43.589	-73.631	0	73.631	-99.5804	-55.9915	-12.4025
MIRKO (16 weeks old)	9	356.651	62.6716	381.715	76.2082	-62.6716	0	62.6716	-51.1442	25.064	101.272
MIRKO (24 weeks old)	10	366.436	50.2268	378.943	51.4519	-50.2268	0	50.2268	-38.9441	12.5077	63.9596
MIRKO (40 weeks old)	11	225.287	39.4253	350.575	47.3103	-39.4253	0	39.4253	77.977	125.287	172.598
βIRKO	12	231.393	25.887	331.402	59.1702	-25.887	0	25.887	40.8384	100.009	159.179
LIRKO	13	231.393	25.887	380.451	46.2267	-25.887	0	25.887	102.831	149.058	195.284
βIRKO-LIRKO	14	231.393	25.887	555.928	149.775	-25.887	0	25.887	174.76	324.534	474.309
βIRKO (chow)	15	206.599	39.797	407.107	70.8883	-39.797	0	39.797	129.619	200.508	271.396
βIRKO (HFD)	16	324.619	34.8223	578.426	43.5279	-34.8223	0	34.8223	210.279	253.807	297.335
LIRKO	17	139.529	28.7342	166.533	21.1726	-28.7342	0	28.7342	5.83165	27.0042	48.1768
LIRKO	18	285.805	16.7795	507.122	41.6541	-16.7795	0	16.7795	179.663	221.317	262.971
βIRKO-ND	19	233.952	33.075	232.827	35.28	-33.075	0	33.075	-36.405	-1.125	34.155
βIRKO-D	20	233.952	33.075	550.08	66.15	-33.075	0	33.075	249.979	316.129	382.279
FIRKO (2 months old)	21	160.811	7.44256	150.685	12.4043	-7.44256	0	7.44256	-22.5302	-10.1259	2.27834
FIRKO (10 months old)	22	191.787	9.37996	125.292	10.3673	-9.37996	0	9.37996	-76.8632	-66.4959	-56.1286
BATIRKO (male, 3 months old)	23	150.983	9.56084	177.469	23.2192	-9.56084	0	9.56084	3.26682	26.486	49.7052
BATIRKO (male, 6 months old)	24	179.382	8.9379	277.09	30.6442	-8.9379	0	8.9379	67.0638	97.708	128.352
BATIRKO (male, 12 months old)	25	175.962	13.5175	278.785	101.996	-13.5175	0	13.5175	0.827605	102.824	204.82
BATIRKO (female, 3 months old)	26	108.609	0	165.999	25.9603	0	0	0	31.4297	57.3899	83.3502
BATIRKO (female, 6 months old)	27	124.492	15.3536	173.894	30.6984	-15.3536	0	15.3536	18.7031	49.4015	80.1
BATIRKO (female, 12 months old)	28	124.778	7.19229	195.715	11.9871	-7.19229	0	7.19229	58.9502	70.9374	82.9245
Ins R	29	239.45	28.7706	284.709	46.7523	-28.7706	0	28.7706	-1.49235	45.2599	92.0122
Ins R-K1030 mutant	30	239.45	28.7706	251.123	38.2048	-28.7706	0	28.7706	-26.531	11.6738	49.8786
MIRKO	31	143.334	31.2901	174.594	30.6243	-31.2901	0	31.2901	0.63577	31.2601	61.8844
MIRKO	32	200.148	33.2693	261.109	36.668	-33.2693	0	33.2693	24.2924	60.9604	97.6285
LIRKO (2 months old)	33	299.12	35.9238	401.76	48.8563	-35.9238	0	35.9238	53.783	102.639	151.496
LIRKO (6 months old)	34	278.325	10.8621	293.103	59.1379	-10.8621	0	10.8621	-44.3596	14.7783	73.9163
βIRKO(2 months old)	35	191.183	23.1811	241.977	25.3102	-23.1811	0	23.1811	25.4832	50.7934	76.1037
βIRKO(6 months old)	36	214.608	23.7857	348.578	39.9599	-23.7857	0	23.7857	94.0104	133.97	173.93
MIRKO(2 months old)	37	191.183	23.1811	192.526	26.3421	-23.1811	0	23.1811	-25	1.34213	27.6843
MIRKO(6 months old)	38	214.608	23.7857	238.873	24.7371	-23.7857	0	23.7857	-0.472124	24.265	49.0021
βIRKO-MIRKO (2 months old)	39	191.183	23.1811	252.744	23.1811	-23.1811	0	23.1811	38.3791	61.5601	84.7412
βIRKO-MIRKO (6 months old)	40	214.608	23.7857	291.304	35.1968	-23.7857	0	23.7857	41.4999	76.6967	111.893
1	-25.8746	0	25.8746	178.559	227.721	276.882		Control	IRKO
2	0	0	0	9.90417	106.343	202.781		-25.8746	178.559	1
3	0	0	0	16.0208	68.5334	121.046		0	227.721	1
4	-26.5893	0	26.5893	36.6896	74.9095	113.129		25.8746	276.882	1
5	-23.6545	0	23.6545	43.7732	98.1956	152.618
6	-43.6406	0	43.6406	132.077	138.364	144.65		0	9.90417	2
7	-40.6913	0	40.6913	119.488	201.82	284.153		0	106.343	2
8	-73.631	0	73.631	-99.5804	-55.9915	-12.4025		0	202.781	2
9	-62.6716	0	62.6716	-51.1442	25.064	101.272
10	-50.2268	0	50.2268	-38.9441	12.5077	63.9596		0	16.0208	3
11	-39.4253	0	39.4253	77.977	125.287	172.598		0	68.5334	3
12	-25.887	0	25.887	40.8384	100.009	159.179		0	121.046	3
13	-25.887	0	25.887	102.831	149.058	195.284
14	-25.887	0	25.887	174.76	324.534	474.309		-26.5893	36.6896	4
15	-39.797	0	39.797	129.619	200.508	271.396		0	74.9095	4
16	-34.8223	0	34.8223	210.279	253.807	297.335		26.5893	113.129	4
17	-28.7342	0	28.7342	5.83165	27.0042	48.1768
18	-16.7795	0	16.7795	179.663	221.317	262.971		-23.6545	43.7732	5
19	-33.075	0	33.075	-36.405	-1.125	34.155		0	98.1956	5
20	-33.075	0	33.075	249.979	316.129	382.279		23.6545	152.618	5
21	-7.44256	0	7.44256	-22.5302	-10.1259	2.27834
22	-9.37996	0	9.37996	-76.8632	-66.4959	-56.1286		-43.6406	132.077	6
23	-9.56084	0	9.56084	3.26682	26.486	49.7052		0	138.364	6
24	-8.9379	0	8.9379	67.0638	97.708	128.352		43.6406	144.65	6
25	-13.5175	0	13.5175	0.827605	102.824	204.82
26	0	0	0	31.4297	57.3899	83.3502		-40.6913	119.488	7
27	-15.3536	0	15.3536	18.7031	49.4015	80.1		0	201.82	7
28	-7.19229	0	7.19229	58.9502	70.9374	82.9245		40.6913	284.153	7
29	-28.7706	0	28.7706	-1.49235	45.2599	92.0122
30	-28.7706	0	28.7706	-26.531	11.6738	49.8786		-73.631	-99.5804	8
31	-31.2901	0	31.2901	0.63577	31.2601	61.8844		0	-55.9915	8
32	-33.2693	0	33.2693	24.2924	60.9604	97.6285		73.631	-12.4025	8
33	-35.9238	0	35.9238	53.783	102.639	151.496
34	-10.8621	0	10.8621	-44.3596	14.7783	73.9163		-62.6716	-51.1442	9
35	-23.1811	0	23.1811	25.4832	50.7934	76.1037		0	25.064	9
36	-23.7857	0	23.7857	94.0104	133.97	173.93		62.6716	101.272	9
37	-23.1811	0	23.1811	-25	1.34213	27.6843
38	-23.7857	0	23.7857	-0.472124	24.265	49.0021		-50.2268	-38.9441	10
39	-23.1811	0	23.1811	38.3791	61.5601	84.7412		0	12.5077	10
40	-23.7857	0	23.7857	41.4999	76.6967	111.893		50.2268	63.9596	10
								-39.4253	77.977	11
								0	125.287	11
								39.4253	172.598	11
								-25.887	40.8384	12
								0	100.009	12
								25.887	159.179	12
								-25.887	102.831	13
								0	149.058	13
								25.887	195.284	13
								-25.887	174.76	14
								0	324.534	14
								25.887	474.309	14
								-39.797	129.619	15
								0	200.508	15
								39.797	271.396	15
								-34.8223	210.279	16
								0	253.807	16
								34.8223	297.335	16
								-28.7342	5.83165	17
								0	27.0042	17
								28.7342	48.1768	17
								-16.7795	179.663	18
								0	221.317	18
								16.7795	262.971	18
								-33.075	-36.405	19
								0	-1.125	19
								33.075	34.155	19
								-33.075	249.979	20
								0	316.129	20
								33.075	382.279	20
								-7.44256	-22.5302	21
								0	-10.1259	21
								7.44256	2.27834	21
								-9.37996	-76.8632	22
								0	-66.4959	22
								9.37996	-56.1286	22
								-9.56084	3.26682	23
								0	26.486	23
								9.56084	49.7052	23
								-8.9379	67.0638	24
								0	97.708	24
								8.9379	128.352	24
								-13.5175	0.827605	25
								0	102.824	25
								13.5175	204.82	25
								0	31.4297	26
								0	57.3899	26
								0	83.3502	26
								-15.3536	18.7031	27
								0	49.4015	27
								15.3536	80.1	27
								-7.19229	58.9502	28
								0	70.9374	28
								7.19229	82.9245	28
								-28.7706	-1.49235	29
								0	45.2599	29
								28.7706	92.0122	29
								-28.7706	-26.531	30
								0	11.6738	30
								28.7706	49.8786	30
								-31.2901	0.63577	31
								0	31.2601	31
								31.2901	61.8844	31
								-33.2693	24.2924	32
								0	60.9604	32
								33.2693	97.6285	32
								-35.9238	53.783	33
								0	102.639	33
								35.9238	151.496	33
								-10.8621	-44.3596	34
								0	14.7783	34
								10.8621	73.9163	34
								-23.1811	25.4832	35
								0	50.7934	35
								23.1811	76.1037	35
								-23.7857	94.0104	36
								0	133.97	36
								23.7857	173.93	36
								-23.1811	-25	37
								0	1.34213	37
								23.1811	27.6843	37
								-23.7857	-0.472124	38
								0	24.265	38
								23.7857	49.0021	38
								-23.1811	38.3791	39
								0	61.5601	39
								23.1811	84.7412	39
								-23.7857	41.4999	40
								0	76.6967	40
								23.7857	111.893	40
	Sr.no	60 minutes/fed
		Control				IRKO						only means compared
		mean	95% CI	upper bound	lower bound	mean	95% CI	upper bound	lower bound	IRKO > control	IRKO< Control	IRKO> Con	IRKO <Con
	1	193.401	25.8746	219.276	167.527	421.122	49.1617	470.284	371.96	1	0	1	0
	2	141.814	0	141.814	141.814	248.157	96.4386	344.596	151.719	1	0	1	0
	3	183.583	0	183.583	183.583	252.116	52.5125	304.629	199.603	1	0	1	0
	4	167.84	26.5893	194.43	141.251	242.75	38.2199	280.97	204.53	1	0	1	0
	5	167.799	23.6545	191.454	144.145	265.995	54.4223	320.417	211.573	1	0	1	0
	6	191.406	43.6406	235.047	147.766	329.77	6.28646	336.056	323.483	1	0	1	0
	7	127.95	40.6913	168.641	87.2584	329.77	82.3326	412.102	247.437	1	0	1	0
	8	419.709	73.631	493.34	346.078	363.717	43.589	407.306	320.128	0	0	0	1
	9	356.651	62.6716	419.323	293.98	381.715	76.2082	457.923	305.507	0	0	1	0
	10	366.436	50.2268	416.662	316.209	378.943	51.4519	430.395	327.492	0	0	1	0
	11	225.287	39.4253	264.713	185.862	350.575	47.3103	397.885	303.264	1	0	1	0
	12	231.393	25.887	257.28	205.506	331.402	59.1702	390.572	272.232	1	0	1	0
	13	231.393	25.887	257.28	205.506	380.451	46.2267	426.678	334.224	1	0	1	0
	14	231.393	25.887	257.28	205.506	555.928	149.775	705.702	406.153	1	0	1	0
	15	206.599	39.797	246.396	166.802	407.107	70.8883	477.995	336.218	1	0	1	0
	16	324.619	34.8223	359.442	289.797	578.426	43.5279	621.954	534.898	1	0	1	0
	17	139.529	28.7342	168.263	110.795	166.533	21.1726	187.706	145.36	0	0	1	0
	18	285.805	16.7795	302.584	269.025	507.122	41.6541	548.776	465.468	1	0	1	0
	19	233.952	33.075	267.027	200.877	232.827	35.28	268.107	197.547	0	0	0	1
	20	233.952	33.075	267.027	200.877	550.08	66.15	616.23	483.93	1	0	1	0
	21	160.811	7.44256	168.253	153.368	150.685	12.4043	163.089	138.281	0	0	0	1
	22	191.787	9.37996	201.167	182.408	125.292	10.3673	135.659	114.924	0	1	0	1
	23	150.983	9.56084	160.544	141.422	177.469	23.2192	200.688	154.25	0	0	1	0
	24	179.382	8.9379	188.32	170.444	277.09	30.6442	307.734	246.446	1	0	1	0
	25	175.962	13.5175	189.479	162.444	278.785	101.996	380.781	176.789	0	0	1	0
	26	108.609	0	108.609	108.609	165.999	25.9603	191.959	140.039	1	0	1	0
	27	124.492	15.3536	139.846	109.138	173.894	30.6984	204.592	143.195	1	0	1	0
	28	124.778	7.19229	131.97	117.586	195.715	11.9871	207.703	183.728	1	0	1	0
	29	239.45	28.7706	268.22	210.679	284.709	46.7523	331.462	237.957	0	0	1	0
	30	239.45	28.7706	268.22	210.679	251.123	38.2048	289.328	212.919	0	0	1	0
	31	143.334	31.2901	174.624	112.044	174.594	30.6243	205.218	143.97	0	0	1	0
	32	200.148	33.2693	233.418	166.879	261.109	36.668	297.777	224.441	0	0	1	0
	33	299.12	35.9238	335.044	263.196	401.76	48.8563	450.616	352.903	1	0	1	0
	34	278.325	10.8621	289.187	267.463	293.103	59.1379	352.241	233.966	0	0	1	0
	35	191.183	23.1811	214.365	168.002	241.977	25.3102	267.287	216.667	1	0	1	0
	36	214.608	23.7857	238.393	190.822	348.578	39.9599	388.538	308.618	1	0	1	0
	37	191.183	23.1811	214.365	168.002	192.526	26.3421	218.868	166.183	0	0	1	0
	38	214.608	23.7857	238.393	190.822	238.873	24.7371	263.61	214.135	0	0	1	0
	39	191.183	23.1811	214.365	168.002	252.744	23.1811	275.925	229.563	1	0	1	0
	40	214.608	23.7857	238.393	190.822	291.304	35.1968	326.501	256.107	1	0	1	0
										24	1	36	4

## Sheet: 90min_all
Kind of IRKO		90 minutes/fed
		Control			IRKO
	Sr. no.	mean	95% CI	mean	95% CI	Control 0-CI	Control 0	Control 0+CI	(IRKO-Control)-CI	IRKO-Control	(IRKO-control)+CI
LIRKO (2 months old)	1	140.103	31.5187	180.649	38.2199	-31.5187	0	31.5187	2.32637	40.5463	78.7661
LIRKO (4 months old)	2	140.275	16.5589	203.055	58.366	-16.5589	0	16.5589	4.41347	62.7794	121.145
LIRKO (6 months old)	3	169.531	32.1562	259.468	0.582762	-32.1562	0	32.1562	89.3543	89.937	90.5198
LIRKO (12 months old)	4	114.139	35.0169	259.468	70.0319	-35.0169	0	35.0169	75.2978	145.33	215.362
MIRKO (7 weeks old)	5	301.045	46.5951	258.872	58.6196	-46.5951	0	46.5951	-100.793	-42.173	16.4467
MIRKO (16 weeks old)	6	237.439	61.4428	260.642	77.4179	-61.4428	0	61.4428	-54.2152	23.2027	100.621
MIRKO (24 weeks old)	7	298.491	126.18	261.622	40.4265	-126.18	0	126.18	-77.2955	-36.8691	3.55741
MIRKO (40 weeks old)	8	167.816	40.5517	241.379	56.3218	-40.5517	0	40.5517	17.2414	73.5632	129.885
βIRKO	9	202.626	14.7926	278.094	38.8304	-14.7926	0	14.7926	36.6378	75.4682	114.299
LIRKO	10	202.626	14.7926	461.114	66.5665	-14.7926	0	14.7926	191.922	258.488	325.055
βIRKO-LIRKO	11	202.626	14.7926	649.79	109.099	-14.7926	0	14.7926	338.066	447.165	556.264
βIRKO (chow)	12	178.68	18.6548	437.563	62.1827	-18.6548	0	18.6548	196.701	258.883	321.066
βIRKO (HFD)	13	313.198	60.9391	577.157	50.9898	-60.9391	0	60.9391	212.97	263.959	314.949
LIRKO	14	106.872	17.3918	123.837	27.978	-17.3918	0	17.3918	-11.0126	16.9655	44.9435
LIRKO	15	193.61	23.2332	527.808	39.5714	-23.2332	0	23.2332	294.627	334.199	373.77
Ins R	16	208.869	23.9755	260.245	34.7645	-23.9755	0	23.9755	16.6116	51.3761	86.1407
Ins R-K1030 mutant	17	208.869	23.9755	240.21	30.9328	-23.9755	0	23.9755	0.408185	31.341	62.2738
MIRKO	18	149.33	35.9969	213.766	39.3839	-35.9969	0	35.9969	25.0525	64.4364	103.82
LIRKO (2 months old)	19	224.34	33.0499	413.49	44.5455	-33.0499	0	33.0499	144.604	189.15	233.695
LIRKO (6 months old)	20	242.611	14.4828	258.621	44.6552	-14.4828	0	14.4828	-28.6453	16.0099	60.665
								Control	IRKO
1	-31.5187	0	31.5187	2.32637	40.5463	78.7661		-31.5187	2.32637	1
2	-16.5589	0	16.5589	4.41347	62.7794	121.145		0	40.5463	1
3	-32.1562	0	32.1562	89.3543	89.937	90.5198		31.5187	78.7661	1
4	-35.0169	0	35.0169	75.2978	145.33	215.362
5	-46.5951	0	46.5951	-100.793	-42.173	16.4467		-16.5589	4.41347	2
6	-61.4428	0	61.4428	-54.2152	23.2027	100.621		0	62.7794	2
7	-126.18	0	126.18	-77.2955	-36.8691	3.55741		16.5589	121.145	2
8	-40.5517	0	40.5517	17.2414	73.5632	129.885
9	-14.7926	0	14.7926	36.6378	75.4682	114.299		-32.1562	89.3543	3
10	-14.7926	0	14.7926	191.922	258.488	325.055		0	89.937	3
11	-14.7926	0	14.7926	338.066	447.165	556.264		32.1562	90.5198	3
12	-18.6548	0	18.6548	196.701	258.883	321.066
13	-60.9391	0	60.9391	212.97	263.959	314.949		-35.0169	75.2978	4
14	-17.3918	0	17.3918	-11.0126	16.9655	44.9435		0	145.33	4
15	-23.2332	0	23.2332	294.627	334.199	373.77		35.0169	215.362	4
16	-23.9755	0	23.9755	16.6116	51.3761	86.1407
17	-23.9755	0	23.9755	0.408185	31.341	62.2738		-46.5951	-100.793	5
18	-35.9969	0	35.9969	25.0525	64.4364	103.82		0	-42.173	5
19	-33.0499	0	33.0499	144.604	189.15	233.695		46.5951	16.4467	5
20	-14.4828	0	14.4828	-28.6453	16.0099	60.665
								-61.4428	-54.2152	6
								0	23.2027	6
								61.4428	100.621	6
								-126.18	-77.2955	7
								0	-36.8691	7
								126.18	3.55741	7
								-40.5517	17.2414	8
								0	73.5632	8
								40.5517	129.885	8
								-14.7926	36.6378	9
								0	75.4682	9
								14.7926	114.299	9
								-14.7926	191.922	10
								0	258.488	10
								14.7926	325.055	10
								-14.7926	338.066	11
								0	447.165	11
								14.7926	556.264	11
								-18.6548	196.701	12
								0	258.883	12
								18.6548	321.066	12
								-60.9391	212.97	13
								0	263.959	13
								60.9391	314.949	13
								-17.3918	-11.0126	14
								0	16.9655	14
								17.3918	44.9435	14
								-23.2332	294.627	15
								0	334.199	15
								23.2332	373.77	15
								-23.9755	16.6116	16
								0	51.3761	16
								23.9755	86.1407	16
								-23.9755	0.408185	17
								0	31.341	17
								23.9755	62.2738	17
								-35.9969	25.0525	18
								0	64.4364	18
								35.9969	103.82	18
								-33.0499	144.604	19
								0	189.15	19
								33.0499	233.695	19
								-14.4828	-28.6453	20
								0	16.0099	20
								14.4828	60.665	20
		90 minutes/fed
		Control					IRKO					only means compared
	Sr. no.	mean	95% CI	upper bound	lower bound	mean	95% CI	upper bound	lower bound	IRKO > control	IRKO< Control	IRKO> Con	IRKO <Con
	1	140.103	31.5187	171.621	108.584	180.649	38.2199	218.869	142.429	0	0	1	0
	2	140.275	16.5589	156.834	123.716	203.055	58.366	261.421	144.689	0	0	1	0
	3	169.531	32.1562	201.687	137.375	259.468	0.582762	260.051	258.886	1	0	1	0
	4	114.139	35.0169	149.155	79.1217	259.468	70.0319	329.5	189.436	1	0	1	0
	5	301.045	46.5951	347.64	254.45	258.872	58.6196	317.491	200.252	0	0	0	1
	6	237.439	61.4428	298.882	175.996	260.642	77.4179	338.06	183.224	0	0	1	0
	7	298.491	126.18	424.671	172.312	261.622	40.4265	302.049	221.196	0	0	0	1
	8	167.816	40.5517	208.368	127.264	241.379	56.3218	297.701	185.057	0	0	1	0
	9	202.626	14.7926	217.418	187.833	278.094	38.8304	316.924	239.263	1	0	1	0
	10	202.626	14.7926	217.418	187.833	461.114	66.5665	527.68	394.547	1	0	1	0
	11	202.626	14.7926	217.418	187.833	649.79	109.099	758.889	540.692	1	0	1	0
	12	178.68	18.6548	197.335	160.025	437.563	62.1827	499.746	375.381	1	0	1	0
	13	313.198	60.9391	374.137	252.259	577.157	50.9898	628.147	526.168	1	0	1	0
	14	106.872	17.3918	124.263	89.4798	123.837	27.978	151.815	95.859	0	0	1	0
	15	193.61	23.2332	216.843	170.377	527.808	39.5714	567.38	488.237	1	0	1	0
	16	208.869	23.9755	232.844	184.893	260.245	34.7645	295.009	225.48	0	0	1	0
	17	208.869	23.9755	232.844	184.893	240.21	30.9328	271.142	209.277	0	0	1	0
	18	149.33	35.9969	185.327	113.333	213.766	39.3839	253.15	174.383	0	0	1	0
	19	224.34	33.0499	257.39	191.29	413.49	44.5455	458.035	368.944	1	0	1	0
	20	242.611	14.4828	257.094	228.128	258.621	44.6552	303.276	213.966	0	0	1	0
										9	0	18	2

## Sheet: 120 min_all
Kind of IRKO	Sr. no.	120 minutes/fed
		Control			IRKO
		mean	95% CI	mean	95% CI	Control 0-CI	Control 0	Control 0+CI	(IRKO-Control)-CI	IRKO-Control	(IRKO-control)+CI
inducible DO IR and IGF-R	1	152.483	27.1683	252.811	69.8614	-27.1683	0	27.1683	30.4667	100.328	170.189
BAT-IRKO	2	163.09	5.60801	464.95	54.6781	-5.60801	0	5.60801	247.182	301.86	356.538
FIRKO (12 weeks)	3	133.162	10.581	518.252	42.3239	-10.581	0	10.581	342.766	385.09	427.414
FIRKO (52 weeks)	4	136.682	6.86916	189.252	34.3458	-6.86916	0	6.86916	18.2243	52.5701	86.9159
αIRKO (2 months old)	5	85.4807	0	110.858	7.7832	0	0	0	17.5941	25.3773	33.1605
αIRKO (5 months old)	6	114.428	0	192.307	56.1724	0	0	0	21.7064	77.8788	134.051
αIRKO (2 months old)	7	105.618	49.9176	191.011	30.8315	-49.9176	0	49.9176	54.5618	85.3933	116.225
αIRKO (5 months old)	8	134.831	55.7903	173.034	60.1948	-55.7903	0	55.7903	-21.9925	38.2022	98.397
αIRKO (12 months old)	9	135.581	26.427	197.004	64.5993	-26.427	0	26.427	-3.17603	61.4232	126.022
LIRKO (2 months old)	10	146.55	32.3399	121.396	13.7756	-32.3399	0	32.3399	-38.9295	-25.1539	-11.3783
LIRKO (4 months old)	11	118.388	14.9859	161.044	53.6336	-14.9859	0	14.9859	-10.9771	42.6565	96.2901
LIRKO (6 months old)	12	150.781	26.0312	187.5	49.7656	-26.0312	0	26.0312	-13.0469	36.7188	86.4844
LIRKO (12 months old)	13	117.231	36.9077	202.692	37.8541	-36.9077	0	36.9077	47.6063	85.4604	123.314
MIRKO (7 weeks old)	14	227.876	67.638	148.136	15.05	-67.638	0	67.638	-94.7898	-79.7398	-64.6898
MIRKO (16 weeks old)	15	106.224	6.14428	135.067	11.0645	-6.14428	0	6.14428	17.7784	28.8429	39.9074
MIRKO (24 weeks old)	16	215.098	86.9782	156.345	7.35027	-86.9782	0	86.9782	-66.1024	-58.7521	-51.4019
MIRKO (40 weeks old)	17	119.54	6.75862	120.69	18.023	-6.75862	0	6.75862	-16.8736	1.14943	19.1724
βIRKO	18	99.7908	33.2832	209.241	5.54721	-33.2832	0	33.2832	103.903	109.45	114.998
LIRKO	19	99.7908	33.2832	350.732	33.2832	-33.2832	0	33.2832	217.658	250.941	284.224
βIRKO-LIRKO	20	99.7908	33.2832	592.251	79.51	-33.2832	0	33.2832	412.95	492.46	571.97
βIRKO (chow)	21	132.995	36.066	304.949	90.7868	-36.066	0	36.066	81.1675	171.954	262.741
βIRKO (HFD)	22	263.706	48.5025	443.909	57.2081	-48.5025	0	48.5025	122.995	180.203	237.411
LIRKO	23	92.7197	24.1972	110.457	39.3331	-24.1972	0	24.1972	-21.596	17.7371	57.0701
LIRKO	24	119.854	14.198	316.291	52.0586	-14.198	0	14.198	144.379	196.437	248.496
βIRKO-ND	25	142.83	33.075	143.955	35.28	-33.075	0	33.075	-34.155	1.125	36.405
βIRKO-D	26	142.83	33.075	431.959	77.1677	-33.075	0	33.075	211.961	289.129	366.296
FIRKO (2 months old)	27	82.8346	5.95821	71.6918	7.44256	-5.95821	0	5.95821	-18.5853	-11.1428	-3.70021
FIRKO (10 months old)	28	144.432	6.41786	67.3574	7.89891	-6.41786	0	6.41786	-84.9737	-77.0748	-69.1759
BATIRKO (male, 3 months old)	29	117.06	6.82917	119.848	21.8534	-6.82917	0	6.82917	-19.0659	2.78742	24.6408
BATIRKO (male, 6 months old)	30	126.391	12.7684	183.718	10.2147	-12.7684	0	12.7684	47.1129	57.3276	67.5424
BATIRKO (male, 12 months old)	31	122.882	15.9753	210.659	47.9258	-15.9753	0	15.9753	39.8504	87.7763	135.702
BATIRKO (female, 3 months old)	32	151.43	3.89404	123.179	7.78808	-3.89404	0	3.89404	-36.0389	-28.2508	-20.4628
BATIRKO (female, 6 months old)	33	99.9989	0	122.886	20.0721	0	0	0	2.81473	22.8868	42.9589
BATIRKO (female, 12 months old)	34	100.308	5.99357	113.756	20.3781	-5.99357	0	5.99357	-6.93014	13.448	33.8261
Ins R	35	202.752	26.3731	212.538	41.9572	-26.3731	0	26.3731	-32.1713	9.78593	51.7431
Ins R-K1030 mutant	36	202.752	26.3731	248.801	28.2035	-26.3731	0	26.3731	17.8451	46.0486	74.252
MIRKO	37	118.883	25.2984	114.818	18.6409	-25.2984	0	25.2984	-22.7061	-4.06522	14.5757
MIRKO	38	113.766	29.2033	159.496	40.738	-29.2033	0	29.2033	4.99229	45.7302	86.4682
LIRKO (2 months old)	39	101.173	8.6217	313.783	45.9824	-8.6217	0	8.6217	166.628	212.61	258.592
LIRKO (6 months old)	40	174.877	10.8621	165.025	37.4138	-10.8621	0	10.8621	-47.266	-9.85222	27.5616
βIRKO(2 months old)	41	110.255	4.20747	152.202	2.10737	-4.20747	0	4.20747	39.8398	41.9472	44.0546
βIRKO(6 months old)	42	175.282	15.2228	284.029	43.7657	-15.2228	0	15.2228	64.9811	108.747	152.512
MIRKO(2 months old)	43	110.255	4.20747	115.638	0	-4.20747	0	4.20747	5.38336	5.38336	5.38336
MIRKO(6 months old)	44	175.282	15.2228	164.603	0	-15.2228	0	15.2228	-10.6793	-10.6793	-10.6793
βIRKO-MIRKO (2 months old)	45	110.255	4.20747	152.187	17.9272	-4.20747	0	4.20747	24.0052	41.9324	59.8596
βIRKO-MIRKO (6 months old)	46	175.282	15.2228	216.052	27.5974	-15.2228	0	15.2228	13.1719	40.7693	68.3667
								Control	IRKO
1	-27.1683	0	27.1683	30.4667	100.328	170.189		-27.1683	30.4667	1
2	-5.60801	0	5.60801	247.182	301.86	356.538		0	100.328	1
3	-10.581	0	10.581	342.766	385.09	427.414		27.1683	170.189	1
4	-6.86916	0	6.86916	18.2243	52.5701	86.9159
5	0	0	0	17.5941	25.3773	33.1605		-5.60801	247.182	2
6	0	0	0	21.7064	77.8788	134.051		0	301.86	2
7	-49.9176	0	49.9176	54.5618	85.3933	116.225		5.60801	356.538	2
8	-55.7903	0	55.7903	-21.9925	38.2022	98.397
9	-26.427	0	26.427	-3.17603	61.4232	126.022		-10.581	342.766	3
10	-32.3399	0	32.3399	-38.9295	-25.1539	-11.3783		0	385.09	3
11	-14.9859	0	14.9859	-10.9771	42.6565	96.2901		10.581	427.414	3
12	-26.0312	0	26.0312	-13.0469	36.7188	86.4844
13	-36.9077	0	36.9077	47.6063	85.4604	123.314		-6.86916	18.2243	4
14	-67.638	0	67.638	-94.7898	-79.7398	-64.6898		0	52.5701	4
15	-6.14428	0	6.14428	17.7784	28.8429	39.9074		6.86916	86.9159	4
16	-86.9782	0	86.9782	-66.1024	-58.7521	-51.4019
17	-6.75862	0	6.75862	-16.8736	1.14943	19.1724		0	17.5941	5
18	-33.2832	0	33.2832	103.903	109.45	114.998		0	25.3773	5
19	-33.2832	0	33.2832	217.658	250.941	284.224		0	33.1605	5
20	-33.2832	0	33.2832	412.95	492.46	571.97
21	-36.066	0	36.066	81.1675	171.954	262.741		0	21.7064	6
22	-48.5025	0	48.5025	122.995	180.203	237.411		0	77.8788	6
23	-24.1972	0	24.1972	-21.596	17.7371	57.0701		0	134.051	6
24	-14.198	0	14.198	144.379	196.437	248.496
25	-33.075	0	33.075	-34.155	1.125	36.405		-49.9176	54.5618	7
26	-33.075	0	33.075	211.961	289.129	366.296		0	85.3933	7
27	-5.95821	0	5.95821	-18.5853	-11.1428	-3.70021		49.9176	116.225	7
28	-6.41786	0	6.41786	-84.9737	-77.0748	-69.1759
29	-6.82917	0	6.82917	-19.0659	2.78742	24.6408		-55.7903	-21.9925	8
30	-12.7684	0	12.7684	47.1129	57.3276	67.5424		0	38.2022	8
31	-15.9753	0	15.9753	39.8504	87.7763	135.702		55.7903	98.397	8
32	-3.89404	0	3.89404	-36.0389	-28.2508	-20.4628
33	0	0	0	2.81473	22.8868	42.9589		-26.427	-3.17603	9
34	-5.99357	0	5.99357	-6.93014	13.448	33.8261		0	61.4232	9
35	-26.3731	0	26.3731	-32.1713	9.78593	51.7431		26.427	126.022	9
36	-26.3731	0	26.3731	17.8451	46.0486	74.252
37	-25.2984	0	25.2984	-22.7061	-4.06522	14.5757		-32.3399	-38.9295	10
38	-29.2033	0	29.2033	4.99229	45.7302	86.4682		0	-25.1539	10
39	-8.6217	0	8.6217	166.628	212.61	258.592		32.3399	-11.3783	10
40	-10.8621	0	10.8621	-47.266	-9.85222	27.5616
41	-4.20747	0	4.20747	39.8398	41.9472	44.0546		-14.9859	-10.9771	11
42	-15.2228	0	15.2228	64.9811	108.747	152.512		0	42.6565	11
43	-4.20747	0	4.20747	5.38336	5.38336	5.38336		14.9859	96.2901	11
44	-15.2228	0	15.2228	-10.6793	-10.6793	-10.6793
45	-4.20747	0	4.20747	24.0052	41.9324	59.8596		-26.0312	-13.0469	12
46	-15.2228	0	15.2228	13.1719	40.7693	68.3667		0	36.7188	12
								26.0312	86.4844	12
								-36.9077	47.6063	13
								0	85.4604	13
								36.9077	123.314	13
								-67.638	-94.7898	14
								0	-79.7398	14
								67.638	-64.6898	14
								-6.14428	17.7784	15
								0	28.8429	15
								6.14428	39.9074	15
								-86.9782	-66.1024	16
								0	-58.7521	16
								86.9782	-51.4019	16
								-6.75862	-16.8736	17
								0	1.14943	17
								6.75862	19.1724	17
								-33.2832	103.903	18
								0	109.45	18
								33.2832	114.998	18
								-33.2832	217.658	19
								0	250.941	19
								33.2832	284.224	19
								-33.2832	412.95	20
								0	492.46	20
								33.2832	571.97	20
								-36.066	81.1675	21
								0	171.954	21
								36.066	262.741	21
								-48.5025	122.995	22
								0	180.203	22
								48.5025	237.411	22
								-24.1972	-21.596	23
								0	17.7371	23
								24.1972	57.0701	23
								-14.198	144.379	24
								0	196.437	24
								14.198	248.496	24
								-33.075	-34.155	25
								0	1.125	25
								33.075	36.405	25
								-33.075	211.961	26
								0	289.129	26
								33.075	366.296	26
								-5.95821	-18.5853	27
								0	-11.1428	27
								5.95821	-3.70021	27
								-6.41786	-84.9737	28
								0	-77.0748	28
								6.41786	-69.1759	28
								-6.82917	-19.0659	29
								0	2.78742	29
								6.82917	24.6408	29
								-12.7684	47.1129	30
								0	57.3276	30
								12.7684	67.5424	30
								-15.9753	39.8504	31
								0	87.7763	31
								15.9753	135.702	31
								-3.89404	-36.0389	32
								0	-28.2508	32
								3.89404	-20.4628	32
								0	2.81473	33
								0	22.8868	33
								0	42.9589	33
								-5.99357	-6.93014	34
								0	13.448	34
								5.99357	33.8261	34
								-26.3731	-32.1713	35
								0	9.78593	35
								26.3731	51.7431	35
								-26.3731	17.8451	36
								0	46.0486	36
								26.3731	74.252	36
								-25.2984	-22.7061	37
								0	-4.06522	37
								25.2984	14.5757	37
								-29.2033	4.99229	38
								0	45.7302	38
								29.2033	86.4682	38
								-8.6217	166.628	39
								0	212.61	39
								8.6217	258.592	39
								-10.8621	-47.266	40
								0	-9.85222	40
								10.8621	27.5616	40
								-4.20747	39.8398	41
								0	41.9472	41
								4.20747	44.0546	41
								-15.2228	64.9811	42
								0	108.747	42
								15.2228	152.512	42
								-4.20747	5.38336	43
								0	5.38336	43
								4.20747	5.38336	43
								-15.2228	-10.6793	44
								0	-10.6793	44
								15.2228	-10.6793	44
								-4.20747	24.0052	45
								0	41.9324	45
								4.20747	59.8596	45
								-15.2228	13.1719	46
								0	40.7693	46
								15.2228	68.3667	46
	Sr. no.	120 minutes/fed
		Control					IRKO					only means compared
		mean	95% CI	upper bound	lower bound	mean	95% CI	upper bound	lower bound	IRKO > control	IRKO< Control	IRKO> Con	IRKO <Con
	1	152.483	27.1683	179.652	125.315	252.811	69.8614	322.673	182.95	1	0	1	0
	2	163.09	5.60801	168.698	157.482	464.95	54.6781	519.628	410.272	1	0	1	0
	3	133.162	10.581	143.743	122.581	518.252	42.3239	560.576	475.928	1	0	1	0
	4	136.682	6.86916	143.551	129.813	189.252	34.3458	223.598	154.907	1	0	1	0
	5	85.4807	0	85.4807	85.4807	110.858	7.7832	118.641	103.075	1	0	1	0
	6	114.428	0	114.428	114.428	192.307	56.1724	248.479	136.135	1	0	1	0
	7	105.618	49.9176	155.536	55.7004	191.011	30.8315	221.843	160.18	1	0	1	0
	8	134.831	55.7903	190.622	79.0412	173.034	60.1948	233.228	112.839	0	0	1	0
	9	135.581	26.427	162.007	109.154	197.004	64.5993	261.603	132.404	0	0	1	0
	10	146.55	32.3399	178.89	114.21	121.396	13.7756	135.172	107.621	0	0	0	1
	11	118.388	14.9859	133.374	103.402	161.044	53.6336	214.678	107.411	0	0	1	0
	12	150.781	26.0312	176.812	124.75	187.5	49.7656	237.266	137.734	0	0	1	0
	13	117.231	36.9077	154.139	80.3237	202.692	37.8541	240.546	164.838	1	0	1	0
	14	227.876	67.638	295.514	160.238	148.136	15.05	163.186	133.086	0	0	0	1
	15	106.224	6.14428	112.369	100.08	135.067	11.0645	146.132	124.003	1	0	1	0
	16	215.098	86.9782	302.076	128.119	156.345	7.35027	163.696	148.995	0	0	0	1
	17	119.54	6.75862	126.299	112.782	120.69	18.023	138.713	102.667	0	0	1	0
	18	99.7908	33.2832	133.074	66.5076	209.241	5.54721	214.788	203.694	1	0	1	0
	19	99.7908	33.2832	133.074	66.5076	350.732	33.2832	384.015	317.449	1	0	1	0
	20	99.7908	33.2832	133.074	66.5076	592.251	79.51	671.761	512.741	1	0	1	0
	21	132.995	36.066	169.061	96.9289	304.949	90.7868	395.736	214.162	1	0	1	0
	22	263.706	48.5025	312.208	215.203	443.909	57.2081	501.117	386.701	1	0	1	0
	23	92.7197	24.1972	116.917	68.5225	110.457	39.3331	149.79	71.1237	0	0	1	0
	24	119.854	14.198	134.052	105.656	316.291	52.0586	368.35	264.232	1	0	1	0
	25	142.83	33.075	175.905	109.755	143.955	35.28	179.235	108.675	0	0	1	0
	26	142.83	33.075	175.905	109.755	431.959	77.1677	509.127	354.791	1	0	1	0
	27	82.8346	5.95821	88.7928	76.8764	71.6918	7.44256	79.1344	64.2493	0	0	0	1
	28	144.432	6.41786	150.85	138.014	67.3574	7.89891	75.2563	59.4585	0	1	0	1
	29	117.06	6.82917	123.89	110.231	119.848	21.8534	141.701	97.9945	0	0	1	0
	30	126.391	12.7684	139.159	113.622	183.718	10.2147	193.933	173.504	1	0	1	0
	31	122.882	15.9753	138.858	106.907	210.659	47.9258	258.584	162.733	1	0	1	0
	32	151.43	3.89404	155.324	147.536	123.179	7.78808	130.967	115.391	0	1	0	1
	33	99.9989	0	99.9989	99.9989	122.886	20.0721	142.958	102.814	1	0	1	0
	34	100.308	5.99357	106.301	94.314	113.756	20.3781	134.134	93.3774	0	0	1	0
	35	202.752	26.3731	229.125	176.379	212.538	41.9572	254.495	170.581	0	0	1	0
	36	202.752	26.3731	229.125	176.379	248.801	28.2035	277.004	220.597	0	0	1	0
	37	118.883	25.2984	144.182	93.5849	114.818	18.6409	133.459	96.1772	0	0	0	1
	38	113.766	29.2033	142.969	84.5625	159.496	40.738	200.234	118.758	0	0	1	0
	39	101.173	8.6217	109.795	92.5513	313.783	45.9824	359.765	267.801	1	0	1	0
	40	174.877	10.8621	185.739	164.015	165.025	37.4138	202.438	127.611	0	0	0	1
	41	110.255	4.20747	114.463	106.048	152.202	2.10737	154.31	150.095	1	0	1	0
	42	175.282	15.2228	190.505	160.059	284.029	43.7657	327.795	240.263	1	0	1	0
	43	110.255	4.20747	114.463	106.048	115.638	0	115.638	115.638	1	0	1	0
	44	175.282	15.2228	190.505	160.059	164.603	0	164.603	164.603	0	0	0	1
	45	110.255	4.20747	114.463	106.048	152.187	17.9272	170.115	134.26	1	0	1	0
	46	175.282	15.2228	190.505	160.059	216.052	27.5974	243.649	188.454	0	0	1	0
										24	2	37	9

## Sheet: FIRKO
Kind of IRKO	Sr. no.	0 minutes/fasting											Fasting													15 minutes												30 minutes											60 minutes
		Control		FIRKO
		mean	95% CI	mean	95% CI	Control 0-CI	Control 0	Control 0+CI	(FIRKO-Control)-CI	FIRKO-Control	(FIRKO-control)+CI		Control	FIRKO		Duration of fasting										Control	FIRKO											Control	FIRKO										Control
inducible DO IR and IGF-R	1	149.837	20.6997	230.365	28.462	-20.6997	0	20.6997	52.066	80.5281	108.99		-20.6997	52.066	1	6 hours										-18.1161	67.1439	1										-23.2832	214.814	1									-25.8746
BAT-IRKO	2	140.2	18.226	236.052	50.4721	-18.226	0	18.226	45.3791	95.8512	146.323		0	80.5281	1											0	122.774	1										0	261.384	1									0
FIRKO (12 weeks)	3	88.1748	0	154.756	24.6889	0	0	0	41.892	66.581	91.2699		20.6997	108.99	1											18.1161	178.405	1										23.2832	307.954	1									25.8746
FIRKO (52 weeks)	4	92.2897	4.57944	123.832	20.6075	-4.57944	0	4.57944	10.9346	31.5421	52.1495
FIRKO (2 months old)	5	64.6079	9.92342	53.4694	7.44256	-9.92342	0	9.92342	-18.5811	-11.1385	-3.69597		-18.226	45.3791	2	6 hours										-9.92342	-9.98417	2										-15.8775	-23.1724	2									-7.44256
FIRKO (10 months old)	6	80.9588	10.3632	59.7989	7.40523	-10.3632	0	10.3632	-28.5651	-21.1599	-13.7547		0	95.8512	2											0	-3.03778	2										0	-17.2183	2									0
BATIRKO (male, 3 months old)	7	83.6336	6.82917	79.4414	8.19501	-6.82917	0	6.82917	-12.3872	-4.19221	4.0028		18.226	146.323	2											9.92342	3.90861	2										15.8775	-11.2643	2									7.44256
BATIRKO (male, 6 months old)	8	87.3134	6.38421	182.435	35.7516	-6.38421	0	6.38421	59.3697	95.1213	130.873
BATIRKO (male, 12 months old)	9	97.8124	7.37321	180.568	15.9753	-7.37321	0	7.37321	66.7807	82.756	98.7313		0	41.892	3	ON										-7.39486	-45.2114	3										-16.2977	-51.3387	3									-9.37996
BATIRKO (female, 3 months old)	10	90.0715	0	112.572	7.78808	0	0	0	14.7128	22.5009	30.289		0	66.581	3											0	-38.7935	3										0	-49.364	3									0
BATIRKO (female, 6 months old)	11	96.389	0	144.586	27.1563	0	0	0	21.0404	48.1967	75.3531		0	91.2699	3											7.39486	-32.3757	3										16.2977	-47.3892	3									9.37996
BATIRKO (female, 12 months old)	12	96.6449	0	121.102	11.9871	0	0	0	12.4695	24.4566	36.4437
													-4.57944	10.9346	4	ON																						-8.19501	4.89477	4									-9.56084
		15 minutes											0	31.5421	4																							0	40.4065	4									0
inducible DO IR and IGF-R	1	364.191	18.1161	486.965	55.6304	-18.1161	0	18.1161	67.1439	122.774	178.405		4.57944	52.1495	4																							8.19501	75.9182	4									9.56084
FIRKO (2 months old)	2	152.963	9.92342	149.925	6.94639	-9.92342	0	9.92342	-9.98417	-3.03778	3.90861
FIRKO (10 months old)	3	199.977	7.39486	161.183	6.41786	-7.39486	0	7.39486	-45.2114	-38.7935	-32.3757		-9.92342	-18.5811	5	16 hours																						-29.3674	87.6496	5									-8.9379
													0	-11.1385	5																							0	105.525	5									0
													9.92342	-3.69597	5																							29.3674	123.401	5									8.9379
		30 minutes
inducible DO IR and IGF-R	1	248.522	23.2832	509.906	46.5703	-23.2832	0	23.2832	214.814	261.384	307.954		-10.3632	-28.5651	6	16 hours																						-11.0598	104.734	6									-13.5175
FIRKO (2 months old)	2	186.633	15.8775	169.415	5.95405	-15.8775	0	15.8775	-23.1724	-17.2183	-11.2643		0	-21.1599	6																							0	136.685	6									0
FIRKO (10 months old)	3	219.744	16.2977	170.38	1.97473	-16.2977	0	16.2977	-51.3387	-49.364	-47.3892		10.3632	-13.7547	6																							11.0598	168.635	6									13.5175
BATIRKO (male, 3 months old)	4	179.331	8.19501	219.738	35.5117	-8.19501	0	8.19501	4.89477	40.4065	75.9182
BATIRKO (male, 6 months old)	5	214.123	29.3674	319.648	17.8758	-29.3674	0	29.3674	87.6496	105.525	123.401		-6.82917	-12.3872	7	ON																						-15.5762	25.642	7									0
BATIRKO (male, 12 months old)	6	211.49	11.0598	348.175	31.9506	-11.0598	0	11.0598	104.734	136.685	168.635		0	-4.19221	7																							0	47.7082	7									0
BATIRKO (female, 3 months old)	7	169.074	15.5762	216.782	22.0662	-15.5762	0	15.5762	25.642	47.7082	69.7745		6.82917	4.0028	7																							15.5762	69.7745	7									0
BATIRKO (female, 6 months old)	8	165.862	11.8071	262.251	53.1319	-11.8071	0	11.8071	43.257	96.389	149.521
BATIRKO (female, 12 months old)	9	166.359	10.7884	275.215	52.7434	-10.7884	0	10.7884	56.1124	108.856	161.599		-6.38421	59.3697	8	ON																						-11.8071	43.257	8									-15.3536
													0	95.1213	8																							0	96.389	8									0
													6.38421	130.873	8																							11.8071	149.521	8									15.3536
		60 minutes
inducible DO IR and IGF-R	1	193.401	25.8746	421.122	49.1617	-25.8746	0	25.8746	178.559	227.721	276.882		-7.37321	66.7807	9	ON																						-10.7884	56.1124	9									-7.19229
FIRKO (2 months old)	2	160.811	7.44256	150.685	12.4043	-7.44256	0	7.44256	-22.5302	-10.1259	2.27834		0	82.756	9																							0	108.856	9									0
FIRKO (10 months old)	3	191.787	9.37996	125.292	10.3673	-9.37996	0	9.37996	-76.8632	-66.4959	-56.1286		7.37321	98.7313	9																							10.7884	161.599	9									7.19229
BATIRKO (male, 3 months old)	4	150.983	9.56084	177.469	23.2192	-9.56084	0	9.56084	3.26682	26.486	49.7052
BATIRKO (male, 6 months old)	5	179.382	8.9379	277.09	30.6442	-8.9379	0	8.9379	67.0638	97.708	128.352		0	14.7128	10	ON
BATIRKO (male, 12 months old)	6	175.962	13.5175	278.785	101.996	-13.5175	0	13.5175	0.827605	102.824	204.82		0	22.5009	10
BATIRKO (female, 3 months old)	7	108.609	0	165.999	25.9603	0	0	0	31.4297	57.3899	83.3502		0	30.289	10
BATIRKO (female, 6 months old)	8	124.492	15.3536	173.894	30.6984	-15.3536	0	15.3536	18.7031	49.4015	80.1
BATIRKO (female, 12 months old)	9	124.778	7.19229	195.715	11.9871	-7.19229	0	7.19229	58.9502	70.9374	82.9245		0	21.0404	11	ON
													0	48.1967	11
													0	75.3531	11
		120 minutes
inducible DO IR and IGF-R	1	152.483	27.1683	252.811	69.8614	-27.1683	0	27.1683	30.4667	100.328	170.189		0	12.4695	12	ON
BAT-IRKO	2	163.09	5.60801	464.95	54.6781	-5.60801	0	5.60801	247.182	301.86	356.538		0	24.4566	12
FIRKO (12 weeks)	3	133.162	10.581	518.252	42.3239	-10.581	0	10.581	342.766	385.09	427.414		0	36.4437	12
FIRKO (52 weeks)	4	136.682	6.86916	189.252	34.3458	-6.86916	0	6.86916	18.2243	52.5701	86.9159
FIRKO (2 months old)	5	82.8346	5.95821	71.6918	7.44256	-5.95821	0	5.95821	-18.5853	-11.1428	-3.70021
FIRKO (10 months old)	6	144.432	6.41786	67.3574	7.89891	-6.41786	0	6.41786	-84.9737	-77.0748	-69.1759
BATIRKO (male, 3 months old)	7	117.06	6.82917	119.848	21.8534	-6.82917	0	6.82917	-19.0659	2.78742	24.6408
BATIRKO (male, 6 months old)	8	126.391	12.7684	183.718	10.2147	-12.7684	0	12.7684	47.1129	57.3276	67.5424
BATIRKO (male, 12 months old)	9	122.882	15.9753	210.659	47.9258	-15.9753	0	15.9753	39.8504	87.7763	135.702
BATIRKO (female, 3 months old)	10	151.43	3.89404	123.179	7.78808	-3.89404	0	3.89404	-36.0389	-28.2508	-20.4628
BATIRKO (female, 6 months old)	11	99.9989	0	122.886	20.0721	0	0	0	2.81473	22.8868	42.9589
BATIRKO (female, 12 months old)	12	100.308	5.99357	113.756	20.3781	-5.99357	0	5.99357	-6.93014	13.448	33.8261
Fasting		Control				FIRKO						only means compared
		mean	95% CI	upper bound	lower bound	mean	95% CI	upper bound	lower bound	IRKO > control	IRKO< Control	IRKO> Con	IRKO <Con
	1	149.837	20.6997	170.537	129.137	230.365	28.462	258.827	201.903	1	0	1	0
	2	140.2	18.226	158.426	121.974	236.052	50.4721	286.524	185.579	1	0	1	0
	3	88.1748	0	88.1748	88.1748	154.756	24.6889	179.445	130.067	1	0	1	0
	4	92.2897	4.57944	96.8692	87.7103	123.832	20.6075	144.439	103.224	1	0	1	0
	5	64.6079	9.92342	74.5314	54.6845	53.4694	7.44256	60.912	46.0268	0	0	0	1
	6	80.9588	10.3632	91.322	70.5957	59.7989	7.40523	67.2041	52.3937	0	1	0	1
	7	83.6336	6.82917	90.4628	76.8044	79.4414	8.19501	87.6364	71.2464	0	0	0	1
	8	87.3134	6.38421	93.6976	80.9291	182.435	35.7516	218.186	146.683	1	0	1	0
	9	97.8124	7.37321	105.186	90.4392	180.568	15.9753	196.544	164.593	1	0	1	0
	10	90.0715	0	90.0715	90.0715	112.572	7.78808	120.36	104.784	1	0	1	0
	11	96.389	0	96.389	96.389	144.586	27.1563	171.742	117.429	1	0	1	0
	12	96.6449	0	96.6449	96.6449	121.102	11.9871	133.089	109.114	1	0	1	0
										9	1	9	3
15 minutes
	1	364.191	18.1161	382.307	346.075	486.965	55.6304	542.596	431.335	1	0	1	0
	2	152.963	9.92342	162.886	143.039	149.925	6.94639	156.871	142.978	0	0	0	1
	3	199.977	7.39486	207.372	192.582	161.183	6.41786	167.601	154.765	0	1	0	1
										1	1	1	2
	1	248.522	23.2832	271.805	225.239	509.906	46.5703	556.476	463.336	1	0	1	0
	2	186.633	15.8775	202.51	170.755	169.415	5.95405	175.369	163.461	0	0	0	1
	3	219.744	16.2977	236.042	203.446	170.38	1.97473	172.355	168.405	0	1	0	1
	4	179.331	8.19501	187.526	171.136	219.738	35.5117	255.249	184.226	0	0	1	0
	5	214.123	29.3674	243.49	184.755	319.648	17.8758	337.524	301.772	1	0	1	0
	6	211.49	11.0598	222.55	200.43	348.175	31.9506	380.125	316.224	1	0	1	0
	7	169.074	15.5762	184.65	153.498	216.782	22.0662	238.848	194.716	1	0	1	0
	8	165.862	11.8071	177.669	154.054	262.251	53.1319	315.382	209.119	1	0	1	0
	9	166.359	10.7884	177.148	155.571	275.215	52.7434	327.958	222.472	1	0	1	0
										6	1	7	2
	1	193.401	25.8746	219.276	167.527	421.122	49.1617	470.284	371.96	1	0	1	0
	2	160.811	7.44256	168.253	153.368	150.685	12.4043	163.089	138.281	0	0	0	1
	3	191.787	9.37996	201.167	182.408	125.292	10.3673	135.659	114.924	0	1	0	1
	4	150.983	9.56084	160.544	141.422	177.469	23.2192	200.688	154.25	0	0	1	0
	5	179.382	8.9379	188.32	170.444	277.09	30.6442	307.734	246.446	1	0	1	0
	6	175.962	13.5175	189.479	162.444	278.785	101.996	380.781	176.789	0	0	1	0
	7	108.609	0	108.609	108.609	165.999	25.9603	191.959	140.039	1	0	1	0
	8	124.492	15.3536	139.846	109.138	173.894	30.6984	204.592	143.195	1	0	1	0
	9	124.778	7.19229	131.97	117.586	195.715	11.9871	207.703	183.728	1	0	1	0
										5	1	7	2
	1	152.483	27.1683	179.652	125.315	252.811	69.8614	322.673	182.95	1	0	1	0
	2	163.09	5.60801	168.698	157.482	464.95	54.6781	519.628	410.272	1	0	1	0
	3	133.162	10.581	143.743	122.581	518.252	42.3239	560.576	475.928	1	0	1	0
	4	136.682	6.86916	143.551	129.813	189.252	34.3458	223.598	154.907	1	0	1	0
	5	82.8346	5.95821	88.7928	76.8764	71.6918	7.44256	79.1344	64.2493	0	0	0	1
	6	144.432	6.41786	150.85	138.014	67.3574	7.89891	75.2563	59.4585	0	1	0	1
	7	117.06	6.82917	123.89	110.231	119.848	21.8534	141.701	97.9945	0	0	1	0
	8	126.391	12.7684	139.159	113.622	183.718	10.2147	193.933	173.504	1	0	1	0
	9	122.882	15.9753	138.858	106.907	210.659	47.9258	258.584	162.733	1	0	1	0
	10	151.43	3.89404	155.324	147.536	123.179	7.78808	130.967	115.391	0	1	0	1
	11	99.9989	0	99.9989	99.9989	122.886	20.0721	142.958	102.814	1	0	1	0
	12	100.308	5.99357	106.301	94.314	113.756	20.3781	134.134	93.3774	0	0	1	0
										7	2	9	3
[truncated: 5 more columns]

## Sheet: MIRKO
Kind of IRKO	Sr. no.	0 minutes/fasting											Fasting													15 minutes													30 minutes
		Control		MIRKO
		mean	95% CI	mean	95% CI	Control 0-CI	Control 0	Control 0+CI	(MIRKO-Control)-CI	MIRKO-Control	(MIRKO-control)+CI		Control	MIRKO	Serial no	Duration of fasting										Control	MIRKO												Control	MIRKO
MIRKO (7 weeks old)	1	95.092	24.0491	91.2577	10.5215	-24.0491	0	24.0491	-14.3558	-3.83436	6.68712		-24.0491	-14.3558	1	ON										-37.2818	10.6981	1											-12.0342	-36.1656	1
MIRKO (16 weeks old)	2	73.9796	4.91542	87.7705	24.5771	-4.91542	0	4.91542	-10.7863	13.7908	38.3679		0	-3.83436	1											0	35.3307	1											0	-4.60123	1
MIRKO (24 weeks old)	3	92.5034	22.0508	98.7463	22.0508	-22.0508	0	22.0508	-15.8079	6.24295	28.2937		24.0491	6.68712	1											37.2818	59.9633	1											12.0342	26.9632	1
MIRKO (40 weeks old)	4	82.7586	18.023	72.4138	23.6552	-18.023	0	18.023	-34	-10.3448	13.3103
MIRKO	5	52.9826	10.6519	63.8519	7.98896	-10.6519	0	10.6519	2.88037	10.8693	18.8583		-4.91542	-10.7863	2	ON										-10.8635	-20.3927	2											-29.4925	-28.7928	2
MIRKO	6	96.6894	6.78966	73.1334	11.5424	-6.78966	0	6.78966	-35.0984	-23.556	-12.0135		0	13.7908	2											0	-1.38167	2											0	4.38632	2
MIRKO(2 months old)	7	64.0294	11.5905	61.879	4.21474	-11.5905	0	11.5905	-6.36512	-2.15038	2.06436		4.91542	38.3679	2											10.8635	17.6294	2											29.4925	37.5654	2
MIRKO(6 months old)	8	83.0582	12.3686	74.3267	0	-12.3686	0	12.3686	-8.73148	-8.73148	-8.73148
βIRKO-MIRKO (2 months old)	9	64.0294	11.5905	51.1271	0	-11.5905	0	11.5905	-12.9023	-12.9023	-12.9023		-22.0508	-15.8079	3	ON										-13.6979	-27.1378	3											-41.6515	-24.1545	3
βIRKO-MIRKO (6 months old)	10	83.0582	12.3686	75.2853	12.3746	-12.3686	0	12.3686	-20.1474	-7.77287	4.60168		0	6.24295	3											0	-13.4399	3											0	17.497	3
													22.0508	28.2937	3											13.6979	0.258045	3											41.6515	59.1485	3
		15 minutes											-18.023	-34	4	ON										-10.4657	-25.9277	4											-37.1724	22.023	4
MIRKO	1	147.755	37.2818	183.086	24.6326	-37.2818	0	37.2818	10.6981	35.3307	59.9633		0	-10.3448	4											0	-11.6562	4											0	59.1954	4
MIRKO	2	200.494	10.8635	199.112	19.011	-10.8635	0	10.8635	-20.3927	-1.38167	17.6294		18.023	13.3103	4											10.4657	2.61516	4											37.1724	96.3678	4
MIRKO(2 months old)	3	180.294	13.6979	166.855	13.6979	-13.6979	0	13.6979	-27.1378	-13.4399	0.258045
MIRKO(6 months old)	4	211.826	10.4657	200.169	14.2714	-10.4657	0	10.4657	-25.9277	-11.6562	2.61516		-10.6519	2.88037	5	ON										-13.6979	15.5828	5											-38.6133	-26.6217	5
βIRKO-MIRKO (2 months old)	5	180.294	13.6979	195.877	0	-13.6979	0	13.6979	15.5828	15.5828	15.5828		0	10.8693	5											0	15.5828	5											0	0.673942	5
βIRKO-MIRKO (6 months old)	6	211.826	10.4657	243.863	32.3485	-10.4657	0	10.4657	-0.31067	32.0379	64.3864		10.6519	18.8583	5											13.6979	15.5828	5											38.6133	27.9695	5
													-6.78966	-35.0984	6	ON										-10.4657	-0.31067	6											-25.1373	-4.16877	6
		30 minutes											0	-23.556	6											0	32.0379	6											0	28.4216	6
MIRKO (7 weeks old)	1	436.067	12.0342	431.465	31.5644	-12.0342	0	12.0342	-36.1656	-4.60123	26.9632		6.78966	-12.0135	6											10.4657	64.3864	6											25.1373	61.012	6
MIRKO (16 weeks old)	2	380.836	29.4925	385.222	33.1791	-29.4925	0	29.4925	-28.7928	4.38632	37.5654
MIRKO (24 weeks old)	3	332.288	41.6515	349.785	41.6515	-41.6515	0	41.6515	-24.1545	17.497	59.1485		-11.5905	-6.36512	7	ON																							-7.3758	18.606	7
MIRKO (40 weeks old)	4	299.425	37.1724	358.621	37.1724	-37.1724	0	37.1724	22.023	59.1954	96.3678		0	-2.15038	7																								0	48.1092	7
MIRKO	5	197.691	38.6133	198.365	27.2956	-38.6133	0	38.6133	-26.6217	0.673942	27.9695		11.5905	2.06436	7																								7.3758	77.6123	7
MIRKO	6	231.544	25.1373	259.965	32.5904	-25.1373	0	25.1373	-4.16877	28.4216	61.012
MIRKO(2 months old)	7	164.571	7.3758	212.68	29.5032	-7.3758	0	7.3758	18.606	48.1092	77.6123		-12.3686	-8.73148	8	ON																							-14.2714	-2.47206	8
MIRKO(6 months old)	8	226.992	14.2714	246.403	21.8828	-14.2714	0	14.2714	-2.47206	19.4108	41.2936		0	-8.73148	8																								0	19.4108	8
βIRKO-MIRKO (2 months old)	9	164.571	7.3758	244.935	8.42948	-7.3758	0	7.3758	71.9353	80.3648	88.7943		12.3686	-8.73148	8																								14.2714	41.2936	8
βIRKO-MIRKO (6 months old)	10	226.992	14.2714	281.353	35.2088	-14.2714	0	14.2714	19.1523	54.3611	89.57
													-11.5905	-12.9023	9	ON																							-7.3758	71.9353	9
													0	-12.9023	9																								0	80.3648	9
		60 minutes											11.5905	-12.9023	9																								7.3758	88.7943	9
MIRKO (7 weeks old)	1	419.709	73.631	363.717	43.589	-73.631	0	73.631	-99.5804	-55.9915	-12.4025
MIRKO (16 weeks old)	2	356.651	62.6716	381.715	76.2082	-62.6716	0	62.6716	-51.1442	25.064	101.272		-12.3686	-20.1474	10	ON																							-14.2714	19.1523	10
MIRKO (24 weeks old)	3	366.436	50.2268	378.943	51.4519	-50.2268	0	50.2268	-38.9441	12.5077	63.9596		0	-7.77287	10																								0	54.3611	10
MIRKO (40 weeks old)	4	225.287	39.4253	350.575	47.3103	-39.4253	0	39.4253	77.977	125.287	172.598		12.3686	4.60168	10																								14.2714	89.57	10
MIRKO	5	143.334	31.2901	174.594	30.6243	-31.2901	0	31.2901	0.63577	31.2601	61.8844
MIRKO	6	200.148	33.2693	261.109	36.668	-33.2693	0	33.2693	24.2924	60.9604	97.6285
MIRKO(2 months old)	7	191.183	23.1811	192.526	26.3421	-23.1811	0	23.1811	-25	1.34213	27.6843
MIRKO(6 months old)	8	214.608	23.7857	238.873	24.7371	-23.7857	0	23.7857	-0.472124	24.265	49.0021
βIRKO-MIRKO (2 months old)	9	191.183	23.1811	252.744	23.1811	-23.1811	0	23.1811	38.3791	61.5601	84.7412
βIRKO-MIRKO (6 months old)	10	214.608	23.7857	291.304	35.1968	-23.7857	0	23.7857	41.4999	76.6967	111.893
		90 minutes
MIRKO (7 weeks old)	1	301.045	46.5951	258.872	58.6196	-46.5951	0	46.5951	-100.793	-42.173	16.4467
MIRKO (16 weeks old)	2	237.439	61.4428	260.642	77.4179	-61.4428	0	61.4428	-54.2152	23.2027	100.621
MIRKO (24 weeks old)	3	298.491	126.18	261.622	40.4265	-126.18	0	126.18	-77.2955	-36.8691	3.55741
MIRKO (40 weeks old)	4	167.816	40.5517	241.379	56.3218	-40.5517	0	40.5517	17.2414	73.5632	129.885
MIRKO	5	149.33	35.9969	213.766	39.3839	-35.9969	0	35.9969	25.0525	64.4364	103.82
		120 minutes
MIRKO (7 weeks old)	1	227.876	67.638	148.136	15.05	-67.638	0	67.638	-94.7898	-79.7398	-64.6898
MIRKO (16 weeks old)	2	106.224	6.14428	135.067	11.0645	-6.14428	0	6.14428	17.7784	28.8429	39.9074
MIRKO (24 weeks old)	3	215.098	86.9782	156.345	7.35027	-86.9782	0	86.9782	-66.1024	-58.7521	-51.4019
MIRKO (40 weeks old)	4	119.54	6.75862	120.69	18.023	-6.75862	0	6.75862	-16.8736	1.14943	19.1724
MIRKO	5	118.883	25.2984	114.818	18.6409	-25.2984	0	25.2984	-22.7061	-4.06522	14.5757
MIRKO	6	113.766	29.2033	159.496	40.738	-29.2033	0	29.2033	4.99229	45.7302	86.4682
MIRKO(2 months old)	7	110.255	4.20747	115.638	0	-4.20747	0	4.20747	5.38336	5.38336	5.38336
MIRKO(6 months old)	8	175.282	15.2228	164.603	0	-15.2228	0	15.2228	-10.6793	-10.6793	-10.6793
βIRKO-MIRKO (2 months old)	9	110.255	4.20747	152.187	17.9272	-4.20747	0	4.20747	24.0052	41.9324	59.8596
βIRKO-MIRKO (6 months old)	10	175.282	15.2228	216.052	27.5974	-15.2228	0	15.2228	13.1719	40.7693	68.3667
Fasting		Control				MIRKO						only means compared
		mean	95% CI	upper bound	lower bound	mean	95% CI	upper bound	lower bound	IRKO > control	IRKO< Control	IRKO> Con	IRKO <Con
	1	95.092	24.0491	119.141	71.0429	91.2577	10.5215	101.779	80.7362	0	0	0	1
	2	73.9796	4.91542	78.8951	69.0642	87.7705	24.5771	112.348	63.1934	0	0	1	0
	3	92.5034	22.0508	114.554	70.4526	98.7463	22.0508	120.797	76.6955	0	0	1	0
	4	82.7586	18.023	100.782	64.7356	72.4138	23.6552	96.069	48.7586	0	0	0	1
	5	52.9826	10.6519	63.6345	42.3307	63.8519	7.98896	71.8409	55.863	0	0	1	0
	6	96.6894	6.78966	103.479	89.8997	73.1334	11.5424	84.6759	61.591	0	1	0	1
	7	64.0294	11.5905	75.6199	52.4388	61.879	4.21474	66.0937	57.6642	0	0	0	1
	8	83.0582	12.3686	95.4267	70.6896	74.3267	0	74.3267	74.3267	0	0	0	1
	9	64.0294	11.5905	75.6199	52.4388	51.1271	0	51.1271	51.1271	0	1	0	1
	10	83.0582	12.3686	95.4267	70.6896	75.2853	12.3746	87.6598	62.9107	0	0	0	1
										0	2	3	7
15 minutes	1	147.755	37.2818	185.037	110.473	183.086	24.6326	207.718	158.453	0	0	1	0
	2	200.494	10.8635	211.357	189.63	199.112	19.011	218.123	180.101	0	0	0	1
	3	180.294	13.6979	193.992	166.596	166.855	13.6979	180.552	153.157	0	0	0	1
	4	211.826	10.4657	222.291	201.36	200.169	14.2714	214.441	185.898	0	0	0	1
	5	180.294	13.6979	193.992	166.596	195.877	0	195.877	195.877	1	0	1	0
	6	211.826	10.4657	222.291	201.36	243.863	32.3485	276.212	211.515	0	0	1	0
										1	0	3	3
30 minutes	1	436.067	12.0342	448.101	424.032	431.465	31.5644	463.03	399.901	0	0	0	1
	2	380.836	29.4925	410.328	351.343	385.222	33.1791	418.401	352.043	0	0	1	0
	3	332.288	41.6515	373.939	290.636	349.785	41.6515	391.436	308.133	0	0	1	0
	4	299.425	37.1724	336.598	262.253	358.621	37.1724	395.793	321.448	0	0	1	0
	5	197.691	38.6133	236.305	159.078	198.365	27.2956	225.661	171.07	0	0	1	0
	6	231.544	25.1373	256.681	206.406	259.965	32.5904	292.556	227.375	0	0	1	0
	7	164.571	7.3758	171.946	157.195	212.68	29.5032	242.183	183.177	1	0	1	0
	8	226.992	14.2714	241.263	212.721	246.403	21.8828	268.286	224.52	0	0	1	0
	9	164.571	7.3758	171.946	157.195	244.935	8.42948	253.365	236.506	1	0	1	0
	10	226.992	14.2714	241.263	212.721	281.353	35.2088	316.562	246.144	1	0	1	0
										3	0	9	1
60 minutes	1	419.709	73.631	493.34	346.078	363.717	43.589	407.306	320.128	0	0	0	1
	2	356.651	62.6716	419.323	293.98	381.715	76.2082	457.923	305.507	0	0	1	0
	3	366.436	50.2268	416.662	316.209	378.943	51.4519	430.395	327.492	0	0	1	0
	4	225.287	39.4253	264.713	185.862	350.575	47.3103	397.885	303.264	1	0	1	0
	5	143.334	31.2901	174.624	112.044	174.594	30.6243	205.218	143.97	0	0	1	0
	6	200.148	33.2693	233.418	166.879	261.109	36.668	297.777	224.441	0	0	1	0
	7	191.183	23.1811	214.365	168.002	192.526	26.3421	218.868	166.183	0	0	1	0
	8	214.608	23.7857	238.393	190.822	238.873	24.7371	263.61	214.135	0	0	1	0
	9	191.183	23.1811	214.365	168.002	252.744	23.1811	275.925	229.563	1	0	1	0
	10	214.608	23.7857	238.393	190.822	291.304	35.1968	326.501	256.107	1	0	1	0
										3	0	9	1
90 minutes	1	301.045	46.5951	347.64	254.45	258.872	58.6196	317.491	200.252	0	0	0	1
	2	237.439	61.4428	298.882	175.996	260.642	77.4179	338.06	183.224	0	0	1	0
	3	298.491	126.18	424.671	172.312	261.622	40.4265	302.049	221.196	0	0	0	1
	4	167.816	40.5517	208.368	127.264	241.379	56.3218	297.701	185.057	0	0	1	0
	5	149.33	35.9969	185.327	113.333	213.766	39.3839	253.15	174.383	0	0	1	0
										0	0	3	2
120 minutes	1	227.876	67.638	295.514	160.238	148.136	15.05	163.186	133.086	0	0	0	1
	2	106.224	6.14428	112.369	100.08	135.067	11.0645	146.132	124.003	1	0	1	0
	3	215.098	86.9782	302.076	128.119	156.345	7.35027	163.696	148.995	0	0	0	1
	4	119.54	6.75862	126.299	112.782	120.69	18.023	138.713	102.667	0	0	1	0
	5	118.883	25.2984	144.182	93.5849	114.818	18.6409	133.459	96.1772	0	0	0	1
	6	113.766	29.2033	142.969	84.5625	159.496	40.738	200.234	118.758	0	0	1	0
	7	110.255	4.20747	114.463	106.048	115.638	0	115.638	115.638	1	0	1	0
	8	175.282	15.2228	190.505	160.059	164.603	0	164.603	164.603	0	0	0	1
	9	110.255	4.20747	114.463	106.048	152.187	17.9272	170.115	134.26	1	0	1	0
	10	175.282	15.2228	190.505	160.059	216.052	27.5974	243.649	188.454	0	0	1	0
										3	0	6	4

[truncated: 3 more sheets: LIRKO, betaIRKO, all IRKO ]
